# Supplementary material for: Extending the Structural Diversity of Labdane Diterpenoids from Marine-Derived Fungus Talaromyces sp. HDN151403 Using Heterologous Expression
Source: MDPI journal article supplement (doi:10.3390/md21120628), 2023-12-03
Supplement: s1 [file s1]

# Extending the structural diversity of labdane diterpenoids from marine derived fungus *Talaromyces* sp. HDN151403 using heterologous expression

Falei Zhang <sup>1, #</sup>, Chuanteng Ma <sup>1, #</sup>, Qian Che <sup>1</sup>, Tianjiao Zhu <sup>1</sup>, Guojian Zhang <sup>1, 2, 3</sup> and Dehai Li <sup>1, 2, \*</sup>

## Contents

|                                                                                                                                                                             |    |
|-----------------------------------------------------------------------------------------------------------------------------------------------------------------------------|----|
| <b>Table S1.</b> Fungal strains and plasmids used in this study .....                                                                                                       | 4  |
| <b>Table S2.</b> PCR primer sets utilized in this study .....                                                                                                               | 6  |
| <b>Table S3.</b> Annotation of each gene in the <i>labd</i> cluster from <i>Talaromyces</i> sp. HDN151403.....                                                              | 8  |
| <b>Table S4.</b> <sup>1</sup> H and <sup>13</sup> C NMR Spectroscopic Data for Compounds <b>1</b> and <b>2</b> in CD <sub>3</sub> OD (125 and 500 MHz) .....                | 9  |
| <b>Table S5.</b> <sup>1</sup> H and <sup>13</sup> C NMR Spectroscopic Data for Compounds <b>8–10</b> in CD <sub>3</sub> OD (125 and 500 MHz).....                           | 10 |
| <b>Table S6.</b> <sup>1</sup> H and <sup>13</sup> C NMR Spectroscopic Data for Compounds <b>11–13</b> in CD <sub>3</sub> OD (125 and 500 MHz).....                          | 11 |
| <b>Figure S1.</b> Representative labdane diterpenoid biosynthetic gene clusters and their biosynthetic pathways in Actinomycetes, fungi and plants.....                     | 12 |
| <b>Figure S2.</b> Cluster heatmap visualization of cblaster <sup>9</sup> search results using the <i>labd</i> cluster to query the fungal genomes from online database..... | 14 |
| <b>Figure S3.</b> Visualization of gene clusters homologous to <i>labd</i> cluster searched by cblaster using clinker tool. <sup>10</sup> .....                             | 15 |
| <b>Figure S4.</b> Neighbor joining method based phylogenetic analysis of P450s from Ascomycetes fungi using MEGA X software .....                                           | 16 |
| <b>Figure S5.</b> Results of protein family classification analysis of LabdC using InterPro database .....                                                                  | 17 |
| <b>Figure S6.</b> Protein sequence alignment of LabdC with other homologs using Blastp (protein-protein BLAST). .....                                                       | 18 |
| <b>Figure S7.</b> Protein sequence alignment of LabdE with other homologs using Blastp (protein-protein BLAST). .....                                                       | 19 |
| <b>Figure S8.</b> Protein sequence alignment of LabdF with other homologs using Blastp (protein-protein BLAST). .....                                                       | 20 |
| <b>Figure S9.</b> RT-PCR results of <i>labd</i> cluster of <i>Talaromyces</i> sp. HDN 151403 under different laboratory culture conditions .....                            | 21 |
| <b>Figure S10.</b> UV-vis spectra of purified compounds. ....                                                                                                               | 22 |
| <b>Figure S11.</b> Comparison of calculated and experimental ECD spectra of <b>3–7</b> in methanol.....                                                                     | 23 |
| <b>Figure S12.</b> <sup>1</sup> H NMR of <b>3</b> in CD <sub>3</sub> OD.....                                                                                                | 24 |
| <b>Figure S13.</b> <sup>13</sup> C NMR of <b>3</b> in CD <sub>3</sub> OD.....                                                                                               | 24 |
| <b>Figure S14.</b> HSQC of <b>3</b> in CD <sub>3</sub> OD. ....                                                                                                             | 25 |
| <b>Figure S15.</b> HMBC of <b>3</b> in CD <sub>3</sub> OD. ....                                                                                                             | 25 |
| <b>Figure S16.</b> <sup>1</sup> H- <sup>1</sup> H COSY of <b>3</b> in CD <sub>3</sub> OD.....                                                                               | 26 |
| <b>Figure S17.</b> ROESY of <b>3</b> in CD <sub>3</sub> OD. ....                                                                                                            | 26 |
| <b>Figure S18.</b> HRESIMS of <b>3</b> .....                                                                                                                                | 27 |
| <b>Figure S19.</b> UV spectrum of <b>3</b> .....                                                                                                                            | 27 |
| <b>Figure S20.</b> <sup>1</sup> H NMR of <b>4</b> in CD <sub>3</sub> OD.....                                                                                                | 28 |
| <b>Figure S21.</b> <sup>13</sup> C NMR and DEPT of <b>4</b> in CD <sub>3</sub> OD. ....                                                                                     | 28 |

|                                                                                               |    |
|-----------------------------------------------------------------------------------------------|----|
| <b>Figure S22.</b> HSQC of <b>4</b> in CD <sub>3</sub> OD.....                                | 29 |
| <b>Figure S23.</b> HMBC of <b>4</b> in CD <sub>3</sub> OD.....                                | 29 |
| <b>Figure S24.</b> <sup>1</sup> H- <sup>1</sup> H COSY of <b>4</b> in CD <sub>3</sub> OD..... | 30 |
| <b>Figure S25.</b> ROESY of <b>4</b> in CD <sub>3</sub> OD.....                               | 30 |
| <b>Figure S26.</b> HRESIMS of <b>4</b> .....                                                  | 31 |
| <b>Figure S27.</b> UV spectrum of <b>4</b> .....                                              | 31 |
| <b>Figure S28.</b> <sup>1</sup> H NMR of <b>5</b> in CD <sub>3</sub> OD.....                  | 32 |
| <b>Figure S29.</b> <sup>13</sup> C NMR of <b>5</b> in CD <sub>3</sub> OD.....                 | 32 |
| <b>Figure S30.</b> HSQC of <b>5</b> in CD <sub>3</sub> OD.....                                | 33 |
| <b>Figure S31.</b> HMBC of <b>5</b> in CD <sub>3</sub> OD.....                                | 33 |
| <b>Figure S32.</b> <sup>1</sup> H- <sup>1</sup> H COSY of <b>5</b> in CD <sub>3</sub> OD..... | 34 |
| <b>Figure S33.</b> ROESY of <b>5</b> in CD <sub>3</sub> OD.....                               | 34 |
| <b>Figure S34.</b> HRESIMS of <b>5</b> .....                                                  | 35 |
| <b>Figure S35.</b> UV spectrum of <b>5</b> .....                                              | 35 |
| <b>Figure S36.</b> <sup>1</sup> H NMR of <b>6</b> in CD <sub>3</sub> OD.....                  | 36 |
| <b>Figure S37.</b> <sup>13</sup> C NMR of <b>6</b> in CD <sub>3</sub> OD.....                 | 36 |
| <b>Figure S38.</b> HSQC of <b>6</b> in CD <sub>3</sub> OD.....                                | 37 |
| <b>Figure S39.</b> HMBC of <b>6</b> in CD <sub>3</sub> OD.....                                | 37 |
| <b>Figure S40.</b> <sup>1</sup> H- <sup>1</sup> H COSY of <b>6</b> in CD <sub>3</sub> OD..... | 38 |
| <b>Figure S41.</b> ROESY of <b>6</b> in CD <sub>3</sub> OD.....                               | 38 |
| <b>Figure S42.</b> HRESIMS of <b>6</b> .....                                                  | 39 |
| <b>Figure S43.</b> UV spectrum of <b>6</b> .....                                              | 39 |
| <b>Figure S44.</b> <sup>1</sup> H NMR of <b>7</b> in CD <sub>3</sub> OD.....                  | 40 |
| <b>Figure S45.</b> <sup>13</sup> C NMR of <b>7</b> in CD <sub>3</sub> OD.....                 | 40 |
| <b>Figure S46.</b> HSQC of <b>7</b> in CD <sub>3</sub> OD.....                                | 41 |
| <b>Figure S47.</b> HMBC of <b>7</b> in CD <sub>3</sub> OD.....                                | 41 |
| <b>Figure S48.</b> <sup>1</sup> H- <sup>1</sup> H COSY of <b>7</b> in CD <sub>3</sub> OD..... | 42 |
| <b>Figure S49.</b> ROESY of <b>7</b> in CD <sub>3</sub> OD.....                               | 42 |
| <b>Figure S50.</b> HRESIMS of <b>7</b> .....                                                  | 43 |
| <b>Figure S51.</b> UV spectrum of <b>7</b> .....                                              | 43 |
| <b>Figure S52.</b> <sup>1</sup> H NMR of <b>1</b> in CD <sub>3</sub> OD.....                  | 44 |
| <b>Figure S53.</b> <sup>13</sup> C NMR of <b>1</b> in CD <sub>3</sub> OD.....                 | 44 |
| <b>Figure S54.</b> <sup>1</sup> H NMR of <b>2</b> in CD <sub>3</sub> OD.....                  | 45 |
| <b>Figure S55.</b> <sup>13</sup> C NMR of <b>2</b> in CD <sub>3</sub> OD.....                 | 45 |
| <b>Figure S56.</b> <sup>1</sup> H NMR of <b>8</b> in CD <sub>3</sub> OD.....                  | 46 |
| <b>Figure S57.</b> <sup>13</sup> C NMR of <b>8</b> in CD <sub>3</sub> OD.....                 | 46 |
| <b>Figure S58.</b> <sup>1</sup> H NMR of <b>9</b> in CD <sub>3</sub> OD.....                  | 47 |
| <b>Figure S59.</b> <sup>13</sup> C NMR of <b>9</b> in CD <sub>3</sub> OD.....                 | 47 |
| <b>Figure S60.</b> <sup>1</sup> H NMR of <b>10</b> in CD <sub>3</sub> OD.....                 | 48 |
| <b>Figure S61.</b> <sup>13</sup> C NMR of <b>10</b> in CD <sub>3</sub> OD.....                | 48 |
| <b>Figure S62.</b> <sup>1</sup> H NMR of <b>11</b> in CD <sub>3</sub> OD.....                 | 49 |
| <b>Figure S63.</b> <sup>13</sup> C NMR of <b>11</b> in CD <sub>3</sub> OD.....                | 49 |
| <b>Figure S64.</b> <sup>1</sup> H NMR of <b>12</b> in CD <sub>3</sub> OD.....                 | 50 |
| <b>Figure S65.</b> <sup>13</sup> C NMR of <b>12</b> in CD <sub>3</sub> OD.....                | 50 |

|                                                                                                                                                                                                                                |    |
|--------------------------------------------------------------------------------------------------------------------------------------------------------------------------------------------------------------------------------|----|
| <b>Figure S66.</b> $^1\text{H}$ NMR of <b>13</b> in $\text{CD}_3\text{OD}$ .....                                                                                                                                               | 51 |
| <b>Figure S67.</b> $^{13}\text{C}$ NMR of <b>13</b> in $\text{CD}_3\text{OD}$ .....                                                                                                                                            | 51 |
| <b>Figure S68.</b> Main conformers of $(2R^*,4S^*,5R^*,9S^*,10R^*)$ - <b>3</b> in ECD calculations and the energy analysis for optimized geometries of dominant conformers at B3LYP/6-31G(d)-GD3BJ level in the gas phase..... | 52 |
| <b>Figure S69.</b> Main conformers of $(5S^*,6S^*,9S^*,10R^*)$ - <b>4</b> in ECD calculations and the energy analysis for optimized geometries of dominant conformers at B3LYP/6-31G(d)-GD3BJ level in the gas phase.....      | 54 |
| <b>Figure S70.</b> Main conformers of $(2S^*,5S^*,9S^*,10R^*)$ - <b>5</b> in ECD calculations and the energy analysis for optimized geometries of dominant conformers at B3LYP/6-31G(d)-GD3BJ level in the gas phase.....      | 55 |
| <b>Figure S71.</b> Main conformers of $(4S^*,5R^*,9S^*,10R^*)$ - <b>6</b> in ECD calculations and the energy analysis for optimized geometries of dominant conformers at B3LYP/6-31G(d)-GD3BJ level in the gas phase.....      | 56 |
| <b>Figure S72.</b> Main conformers of $(2R^*,4S^*,5R^*,9S^*,10R^*)$ - <b>7</b> in ECD calculations and the energy analysis for optimized geometries of dominant conformers at B3LYP/6-31G(d)-GD3BJ level in the gas phase..... | 58 |
| <b>Supplementary S1.</b> The Z-matrices of $(2R^*,4S^*,5R^*,9S^*,10R^*)$ - <b>3</b> optimized at B3LYP/6-31G(d)-GD3BJ level by Gaussian .....                                                                                  | 60 |
| <b>Supplementary S2.</b> The Z-matrices of $(5S^*,6S^*,9S^*,10R^*)$ - <b>4</b> optimized at B3LYP/6-31G(d)-GD3BJ level by Gaussian. ....                                                                                       | 66 |
| <b>Supplementary S3.</b> The Z-matrices of $(2S^*,5S^*,9S^*,10R^*)$ - <b>5</b> optimized at B3LYP/6-31G(d)-GD3BJ level by Gaussian. ....                                                                                       | 68 |
| <b>Supplementary S4.</b> The Z-matrices of $(4S^*,5R^*,9S^*,10R^*)$ - <b>6</b> optimized at B3LYP/6-31G(d)-GD3BJ level by Gaussian. ....                                                                                       | 72 |
| <b>Supplementary S5.</b> The Z-matrices of $(2R^*,4S^*,5R^*,9S^*,10R^*)$ - <b>7</b> optimized at B3LYP/6-31G(d)-GD3BJ level by Gaussian .....                                                                                  | 78 |

**Table S1.** Fungal strains and plasmids used in this study.

| Strain/plasmid                              | Primer name                                                                        | Description                                                                                                   | Reference     |
|---------------------------------------------|------------------------------------------------------------------------------------|---------------------------------------------------------------------------------------------------------------|---------------|
| <i>Talaromyces</i> sp.<br>HDN151403         |                                                                                    | Antarctica sponge-derived fungus, GenBank: MW888514                                                           | <sup>34</sup> |
| <i>E. coli</i> XL1-blue                     |                                                                                    | <i>recA1 endA1 gyrA96 thi-1 hsdR17supE44 relA1 lac</i> [ <i>F'</i> <i>pro AB lac IqZΔM15 Tn10 (Tetr)</i> ]    | This study    |
| <i>Saccharomyces cerevisiae</i> BJ5464-NpgA |                                                                                    | ( <i>MATα ura3-52 his3-Δ200 leu2-Δ1 trp1 pep4::HIS3 prb1 Δ1.6R can1 GAL</i> )                                 | This study    |
| <i>Aspergillus nidulans</i> A1145           |                                                                                    | <i>pyrG89; pyroA4; nkuA::argB; riboB2</i>                                                                     | This study    |
| AN-empty vectors                            |                                                                                    | Harboring three empty pANU, pANR, and pANP vectors                                                            | This study    |
| AN- <i>labdA</i>                            |                                                                                    | Harboring the plasmid pANU- <i>labdA</i>                                                                      | This study    |
| AN- <i>labdAB</i>                           |                                                                                    | Harboring the plasmids pANU- <i>labdA</i> and pANP- <i>labdB</i>                                              | This study    |
| AN- <i>labdABE</i>                          |                                                                                    | Harboring the plasmids pANU- <i>labdA-labdE</i> and pANP- <i>labdB</i>                                        | This study    |
| AN- <i>labdABF</i>                          |                                                                                    | Harboring the plasmids pANU- <i>labdA-labdF</i> and pANP- <i>labdB</i>                                        | This study    |
| AN- <i>labdABEF</i>                         |                                                                                    | Harboring the plasmids pANU- <i>labdA-labdE-labdF</i> and pANP- <i>labdB</i>                                  | This study    |
| AN- <i>labdABEFG</i>                        |                                                                                    | Harboring the plasmids pANU- <i>labdA-labdE-labdF</i> , pANP- <i>labdB</i> and pANR- <i>labdG</i>             | This study    |
| AN- <i>labdABDEFG</i>                       |                                                                                    | Harboring the plasmids pANU- <i>labdA-labdE-labdF</i> , pANP- <i>labdB</i> and pANR- <i>labdD-labdG</i>       | This study    |
| AN- <i>labdABCDEG</i>                       |                                                                                    | Harboring the plasmids pANU- <i>labdA-labdE</i> , pANP- <i>labdB</i> and pANR- <i>labdC-labdD-labdG</i>       | This study    |
| AN- <i>labdABCDEFG</i>                      |                                                                                    | Harboring the plasmids pANU- <i>labdA-labdE-labdF</i> , pANP- <i>labdB</i> and pANR- <i>labdC-labdD-labdG</i> | This study    |
| AN- <i>labdCDEFG</i>                        |                                                                                    | Harboring the plasmids pANU- <i>labdE-labdF</i> and pANR- <i>labdC-labdD-labdG</i>                            | This study    |
| AN- <i>labdE</i>                            |                                                                                    | Harboring the plasmids pANU- <i>labdE</i>                                                                     | This study    |
| AN- <i>labdG</i>                            |                                                                                    | Harboring the plasmids pANR- <i>labdG</i>                                                                     | This study    |
| pANR                                        |                                                                                    | <i>E. coli</i> -yeast-fungal shuttle vectors, ampicillin resistance, selection is by <i>riboB</i> .           | <sup>35</sup> |
| pANP                                        |                                                                                    | <i>E. coli</i> -yeast-fungal shuttle vectors, ampicillin resistance, selection is by <i>pyroA</i> .           | <sup>35</sup> |
| pANU                                        |                                                                                    | <i>E. coli</i> -yeast-fungal shuttle vectors, ampicillin resistance, selection is by <i>pyrG</i> .            | <sup>35</sup> |
| pANU- <i>labdA</i>                          | U- <i>labdA</i> -F1/U- <i>labdA</i> -R1                                            | <i>labdA</i> gDNA with downstream 400 bp used the promoter <i>glaA</i> in <i>PacI</i> -linearized pANU        | This study    |
| pANU- <i>labdA-labdE-labdF</i>              | U- <i>labdA</i> -F2/U- <i>labdA</i> -R2<br>U- <i>labdE</i> -F1/U- <i>labdE</i> -R1 | <i>labdA</i> gDNA with downstream 400 bp, <i>labdE</i> gDNA with downstream 500 bp and <i>labdF</i> gDNA with | This study    |



|                                |                                         |                                                                                                        |            |
|--------------------------------|-----------------------------------------|--------------------------------------------------------------------------------------------------------|------------|
|                                | U- <i>labdF</i> -F1/U- <i>labdF</i> -R1 | downstream 400 bp in <i>PacI</i> -linearized pANU                                                      |            |
| pANU- <i>labdA-labdE</i>       | U- <i>labdA</i> -F2/U- <i>labdA</i> -R2 | <i>labdA</i> gDNA with downstream 400 bp and <i>labdE</i>                                              | This study |
|                                | U- <i>labdE</i> -F1/U- <i>labdE</i> -R2 | gDNA with downstream 500 bp in <i>PacI</i> -linearized pANU                                            |            |
| pANU- <i>labdA-labdF</i>       | U- <i>labdA</i> -F2/U- <i>labdA</i> -R2 | <i>labdA</i> gDNA with downstream 400 bp and <i>labdF</i>                                              | This study |
|                                | U- <i>labdF</i> -F2/U- <i>labdF</i> -R1 | gDNA with downstream 400 bp in <i>PacI</i> -linearized pANU                                            |            |
| pANU- <i>labdE-labdF</i>       | U- <i>labdE</i> -F2/U- <i>labdE</i> -R1 | <i>labdE</i> gDNA with downstream 500 bp and <i>labdF</i>                                              | This study |
|                                | U- <i>labdF</i> -F1/U- <i>labdF</i> -R1 | gDNA with downstream 400 bp in <i>PacI</i> -linearized pANU                                            |            |
| pANU- <i>labdE</i>             | U- <i>labdE</i> -F2/U- <i>labdE</i> -R2 | <i>labdE</i> gDNA with downstream 500 bp in <i>PacI</i> -linearized pANU                               | This study |
| pANR- <i>labdC-labdD-labdG</i> | R- <i>labdC</i> -F1/R- <i>labdC</i> -R1 | <i>labdC</i> gDNA with downstream 500 bp, <i>labdD</i> gDNA                                            | This study |
|                                | R- <i>labdD</i> -F1/R- <i>labdD</i> -R1 | with downstream 500 bp and <i>labdG</i> gDNA with                                                      |            |
|                                | R- <i>labdG</i> -F1/R- <i>labdG</i> -R1 | downstream 500 bp in <i>PacI</i> -linearized pANR                                                      |            |
| pANR- <i>labdD-labdG</i>       | R- <i>labdD</i> -F2/R- <i>labdD</i> -R1 | <i>labdD</i> gDNA with downstream 500 bp and <i>labdG</i>                                              | This study |
|                                | R- <i>labdG</i> -F1/R- <i>labdG</i> -R1 | gDNA with downstream 500 bp in <i>PacI</i> -linearized pANR                                            |            |
| pANR- <i>labdG</i>             | R- <i>labdG</i> -F1/R- <i>labdG</i> -R2 | <i>labdG</i> gDNA with downstream 500 bp in <i>PacI</i> -linearized pANR                               | This study |
| pANP- <i>labdB</i>             | P- <i>labdB</i> -F1/P- <i>labdB</i> -R1 | <i>labdB</i> gDNA with downstream 500 bp used the promoter <i>amyB</i> in <i>PacI</i> -linearized pANP | This study |

**Table S2.** PCR primer sets utilized in this study.

| Primer name         | Oligonucleotide sequence (5'→3') <sup>a</sup>                       |
|---------------------|---------------------------------------------------------------------|
| <i>amyB</i> -F      | GATTAAAGGTGCCGAACGAGC                                               |
| <i>amyB</i> -R      | AAATGCCTTCTGTGGGGTTTATTG                                            |
| <i>glaA</i> -F      | CCTGATCTTCCGAACCTGGTCG                                              |
| <i>glaA</i> -R      | TGCTGAGGTGTAATGATGCTGG                                              |
| <i>gpdA</i> -F      | ACTCCGGTGAATTGATTTGGGTG                                             |
| <i>gpaA</i> -R      | TGTTTAGATGTGTCTATGTGGCGG                                            |
| <i>labdA</i> -F     | ATGGGCCCAATGGATTTGC                                                 |
| <i>labdA</i> -R     | TCATAACTCAAGGGACATGCGG                                              |
| <i>labdB</i> -F     | ATGTCTAATGACACCACTACCACGG                                           |
| <i>labdB</i> -R     | TCAATTTCGTAATGGCCAGTGTATGAC                                         |
| <i>labdC</i> -F     | ATGATCACAGATCATGTCTCCCAGC                                           |
| <i>labdC</i> -R     | CCAAGCGGCGTAGTATGCC                                                 |
| <i>labdD</i> -F     | GTCCAGTATGACAATGCTGCAG                                              |
| <i>labdD</i> -R     | GCGTGCCTAGAACAGCGATAG                                               |
| <i>labdE</i> -F     | ATGGCTCCCAGGATCAGTC                                                 |
| <i>labdE</i> -R     | TCAAGCTTTTGTAGCTCTGGTGG                                             |
| <i>labdF</i> -F     | ATGTCCACCGCAAAGCGTG                                                 |
| <i>labdF</i> -R     | TCACACAAGTATCGGTCGTAGTCG                                            |
| <i>labdG</i> -F     | ATGGCATCTAACTGCCCCGC                                                |
| <i>labdG</i> -R     | TCAATCCAAGGGTTTGTGAGG                                               |
| ITS-1               | TCCGTAGGTGAACCTGCGG                                                 |
| ITS-4               | TCCTCCGCTTATTGATATGC                                                |
| Tubulin-F           | ATTTGCCATCTTCACATCGGTCAGGCTG                                        |
| Tubulin-R           | TTAGTACTCGGCATCACCCTCGACATCC                                        |
| U- <i>labdA</i> -F1 | <u>ATCCCCAGCATCATTACACCTCAGCATTAAATTAAGGCATGGGCCCAATGGATTTGCAAG</u> |
| U- <i>labdA</i> -R1 | <u>CTGCAGCCCGGGGATCCACTAGTTCTAGAGCGGCCGGTACCAGACGACACGATAGTTG</u>   |
| U- <i>labdA</i> -F2 | <u>CTGAGCTTCATCCCCAGCATCATTACACCTCAGCATTAAATATGGGCCCAATGGATTTGC</u> |
| U- <i>labdA</i> -R2 | <u>CTTGGGTCTCTCCCGTCACCCAAATCAATTCACCGGAGTGGTACCAGACGACACGATAG</u>  |
| P- <i>labdB</i> -F1 | <u>TTCTCTGAACAATAAACCCACAGAAAGGCATTTTTAATATGTCTAATGACACCACTACC</u>  |
| P- <i>labdB</i> -R1 | <u>CGATAAGCTTGATATCGAATTCCTGCAGCCCGGGGATCTTGAATCTGAAGTCCACGGC</u>   |
| U- <i>labdE</i> -F1 | <u>TTGACTAACCATTACCCCGCCACATAGACACATCTAAACAATGGCTCCCAGGATCAGTC</u>  |
| U- <i>labdE</i> -F2 | <u>CTGAGCTTCATCCCCAGCATCATTACACCTCAGCATTAAATATGGCTCCCAGGATCAGTC</u> |
| U- <i>labdE</i> -R1 | <u>ATTGTTATATCATTTATAGCTCGTTCGGCACCTTTAATCTAGGTTGGATGACGTGCCAG</u>  |
| U- <i>labdE</i> -R2 | <u>TCCTGCAGCCCGGGGATCCACTAGTTCTAGAGCGGCCCTAGGTTGGATGACGTGCCAGG</u>  |
| U- <i>labdF</i> -F1 | <u>AGCTCTCCCTTCTCTGAACAATAAACCCACAGAAAGGCATTTATGTCCACCGCAAAGCG</u>  |
| U- <i>labdF</i> -F2 | <u>CTCTCCCTTCTCTGAACAATAAACCCACAGAAAGGCATTTATGTCCACCGCAAAGCGTG</u>  |
| U- <i>labdF</i> -R1 | <u>CCTGCAGCCCGGGGATCCACTAGTTCTAGAGCGGCCGCGTATCATGTGTAGCACCATC</u>   |
| R- <i>labdC</i> -F1 | <u>GCCTGAGCTTCATCCCCAGCATCATTACACCTCAGCAATGATCACAGATCATGTCTCCC</u>  |
| R- <i>labdC</i> -R1 | <u>TGTTATATCATTTATAGCTCGTTCGGCACCTTTAATCCCTGACGGCGATACATACCTAG</u>  |
| R- <i>labdD</i> -F1 | <u>CTCCCTTCTCTGAACAATAAACCCACAGAAAGGCATTTATGTCTACTGCGAAAGTCCAG</u>  |
| R- <i>labdD</i> -F2 | <u>TGAGCTTCATCCCCAGCATCATTACACCTCAGCAATGTCTACTGCGAAAGTCCAGTATG</u>  |
| R- <i>labdD</i> -R1 | <u>GATAAGCTTGATATCGAATTCCTGCAGCCCGGGGATCCGAGCGTTACCTCACTTACAG</u>   |

---

|                     |                                                                      |
|---------------------|----------------------------------------------------------------------|
| R- <i>labdG</i> -F1 | <u>CCATTACCCCGCCACATAGACACATCTAAACATTAAT</u> GACACAATTGCCTTCAAGATGC  |
| R- <i>labdG</i> -R1 | <u>GTCATAGGTCGCCAGGTACGACCAGTTCGGAAGATCAGG</u> CCTGAACGATGGATGAAGCC  |
| R- <i>labdG</i> -R2 | <u>CGATAAGCTTGATATCGAATTCCTGCAGCCCGGGGGATCC</u> CCTGAACGATGGATGAAGCC |

---

<sup>a</sup> The underlined sequence is a homologous recombination binding region.

**Table S3.** Annotation of each gene in the *labd* cluster from *Talaromyces* sp. HDN151403.

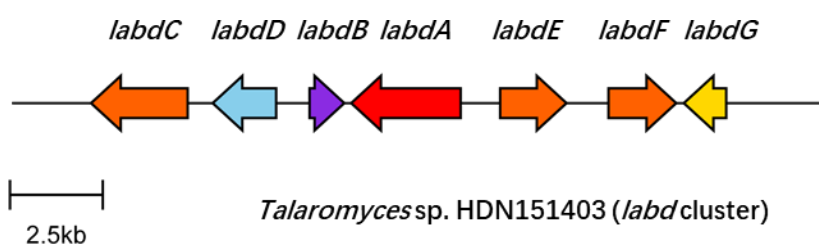

| Genes        | Size | Translate | Putative Function                       | Closest Homolog (Origin, Accession No.)        | Identity (%) |
|--------------|------|-----------|-----------------------------------------|------------------------------------------------|--------------|
| <i>labdC</i> | 780  | –         | Bifunctional<br>P450/methyltransferase. | <i>Talaromyces verruculosus</i> , KUL89355.1   | 758/780(97%) |
| <i>labdD</i> | 509  | –         | Aldehyde dehydrogenase                  | <i>Talaromyces pinophilus</i> , GAM41999.1     | 484/509(95%) |
| <i>labdB</i> | 311  | +         | Tyrosine phosphatase                    | <i>Talaromyces verruculosus</i> , KUL89334.1   | 300/311(96%) |
| <i>labdA</i> | 960  | –         | Type II terpene cyclase                 | <i>Talaromyces verruculosus</i> , A0A348FUE1.1 | 860/963(89%) |
| <i>labdE</i> | 501  | +         | P450                                    | <i>Talaromyces pinophilus</i> , KAF3385867.1   | 500/501(99%) |
| <i>labdF</i> | 542  | +         | P450                                    | <i>Talaromyces verruculosus</i> , KUL89225.1   | 527/542(97%) |
| <i>labdG</i> | 314  | –         | SDR                                     | <i>Talaromyces verruculosus</i> , KUL89357.1   | 308/314(98%) |

**Table S4.** <sup>1</sup>H and <sup>13</sup>C NMR Spectroscopic Data for Compounds **1** and **2** in CD<sub>3</sub>OD (125 and 500 MHz).

| no. | <b>1</b>               |                      | <b>2</b>               |                      |
|-----|------------------------|----------------------|------------------------|----------------------|
|     | $\delta_C$ , mult      | $\delta_H$ (J in Hz) | $\delta_C$ , mult      | $\delta_H$ (J in Hz) |
| 1a  | 38.3, CH <sub>2</sub>  | 1.81, m              | 38.3, CH <sub>2</sub>  | 1.81, m              |
| 1b  |                        | 1.19, m              |                        | 1.19, m              |
| 2   | 28.6, CH <sub>2</sub>  | 1.65 m               | 28.6, CH <sub>2</sub>  | 1.65, m              |
| 3   | 79.4, CH               | 3.20, m              | 79.4, CH               | 3.20, m              |
| 4   | 40.2, C                | –                    | 40.2, C                | –                    |
| 5   | 56.0, CH               | 1.12, dd (12.5, 2.8) | 56.0, CH               | 1.12, dd (12.5, 3.3) |
| 6a  | 25.3, CH <sub>2</sub>  | 1.76, m              | 25.2, CH <sub>2</sub>  | 1.76, m              |
| 6b  |                        | 1.41, m              |                        | 1.40, m              |
| 7a  | 39.3, CH <sub>2</sub>  | 2.40, m              | 39.4, CH <sub>2</sub>  | 2.40, m              |
| 7b  |                        | 1.98, m              |                        | 1.98, m              |
| 8   | 149.3, C               | –                    | 149.5, C               | –                    |
| 9   | 57.1, CH               | 1.61, m              | 58.3, CH               | 1.56, m              |
| 10  | 40.4, C                | –                    | 40.5, C                | –                    |
| 11a | 22.8, CH <sub>2</sub>  | 1.68, m              | 22.2, CH <sub>2</sub>  | 1.54, m              |
| 11b |                        | 1.56, m              |                        | 1.33, m              |
| 12a | 40.7, CH <sub>2</sub>  | 2.31, m              | 37.0, CH <sub>2</sub>  | 1.51, m              |
| 12b |                        | 2.01, m              |                        | 1.02, m              |
| 13  | 161.9, C               | –                    | 32.2, CH               | 1.89, m              |
| 14a | 116.8, CH              | 5.61, s              | 42.5, CH <sub>2</sub>  | 2.28, dd (14.7, 6.6) |
| 14b |                        |                      |                        | 2.06, dd (14.7, 8.0) |
| 15  | 170.3, C               | –                    | 177.2, C               | –                    |
| 16  | 18.9, CH <sub>3</sub>  | 2.13, d (1.2)        | 20.4, CH <sub>3</sub>  | 0.96, d (6.6)        |
| 17a | 107.2, CH <sub>2</sub> | 4.89, s              | 107.2, CH <sub>2</sub> | 4.83, s              |
| 17b |                        | 4.55, s              |                        | 4.52, s              |
| 18  | 16.1, CH <sub>3</sub>  | 0.77, s              | 16.1, CH <sub>2</sub>  | 0.77, s              |
| 19  | 28.9, CH <sub>3</sub>  | 0.98, s              | 28.9, CH <sub>3</sub>  | 0.98, s              |
| 20  | 15.0, CH <sub>3</sub>  | 0.73, s              | 15.0, CH <sub>3</sub>  | 0.72, s              |

**Table S5.**  $^1\text{H}$  and  $^{13}\text{C}$  NMR Spectroscopic Data for Compounds **8–10** in  $\text{CD}_3\text{OD}$  (125 and 500 MHz).

| no. | 8                          |                               | 9                          |                               | 10                         |                               |
|-----|----------------------------|-------------------------------|----------------------------|-------------------------------|----------------------------|-------------------------------|
|     | $\delta_{\text{C}}$ , mult | $\delta_{\text{H}}$ (J in Hz) | $\delta_{\text{C}}$ , mult | $\delta_{\text{H}}$ (J in Hz) | $\delta_{\text{C}}$ , mult | $\delta_{\text{H}}$ (J in Hz) |
| 1a  | 40.8, CH <sub>2</sub>      | 1.85–1.94, m                  | 47.5, CH <sub>2</sub>      | 2.37–2.44, m                  | 41.8, CH <sub>2</sub>      | 1.70–1.79, m                  |
| 1b  |                            | 1.05–1.15, m                  |                            | 0.98–1.04, m                  |                            | 1.47, t (12.2)                |
| 2a  | 21.2, CH <sub>2</sub>      | 1.85–1.94, m                  | 65.5, CH                   | 4.11, m                       | 67.7, CH                   | 4.16, m                       |
| 2b  |                            | 1.49–1.57 m                   |                            |                               |                            |                               |
| 3a  | 39.9, CH <sub>2</sub>      | 2.11–2.15, m                  | 48.9, CH <sub>2</sub>      | 1.99–2.06, m                  | 75.1, CH                   | 3.96, d (2.6)                 |
| 3b  |                            | 1.05–1.15, m                  |                            | 0.98–1.04, m                  |                            |                               |
| 4   | 45.1, C                    | –                             | 46.0, C                    | –                             | 49.8, C                    | –                             |
| 5   | 57.4, CH                   | 1.36, m                       | 56.7, CH                   | 1.34, dd (12.5, 2.9)          | 48.9, CH                   | 1.70–1.79, m                  |
| 6a  | 27.6, CH <sub>2</sub>      | 1.99–2.04, m                  | 27.1, CH <sub>2</sub>      | 1.99–2.06, m                  | 26.7, CH <sub>2</sub>      | 1.86–1.95, m                  |
| 6b  |                            | 1.85–1.94, m                  |                            | 1.83, m                       |                            |                               |
| 7a  | 40.4, CH <sub>2</sub>      | 2.42, m                       | 39.6, CH <sub>2</sub>      | 2.37–2.44, m                  | 39.7, CH <sub>2</sub>      | 2.42, m                       |
| 7b  |                            | 1.85–1.94, m                  |                            | 1.94, m                       |                            | 1.86–1.95, m                  |
| 8   | 149.4, C                   | –                             | 148.8, C                   | –                             | 149.0, C                   | –                             |
| 9   | 56.6, CH                   | 1.64, dd (11.0, 1.7)          | 56.5, CH                   | 1.69, m                       | 56.4, CH                   | 1.70–1.79, m                  |
| 10  | 41.5, C                    | –                             | 42.4, C                    | –                             | 41.7, C                    | –                             |
| 11a | 22.9, CH <sub>2</sub>      | 1.73, m                       | 23.0, CH <sub>2</sub>      | 1.76, m                       | 23.0, CH <sub>2</sub>      | 1.70–1.79, m                  |
| 11b |                            | 1.49–1.57 m                   |                            | 1.57, m                       |                            | 1.57, m                       |
| 12a | 39.3, CH <sub>2</sub>      | 2.30, m                       | 40.7, CH <sub>2</sub>      | 2.31, m                       | 40.7, CH <sub>2</sub>      | 2.31, m                       |
| 12b |                            | 1.99–2.04, m                  |                            | 2.11, m                       |                            | 2.04, m                       |
| 13  | 162.0, C                   | –                             | 161.9, C                   | –                             | 161.9, C                   | –                             |
| 14  | 116.7, CH                  | 5.61, d (1.2)                 | 116.8, CH                  | 5.62, d (1.2)                 | 116.9, CH                  | 5.62, s                       |
| 15  | 170.2, C                   | –                             | 170.2, C                   | –                             | 170.3, C                   | –                             |
| 16  | 18.9, CH <sub>3</sub>      | 2.13, d (1.2)                 | 18.9, CH <sub>3</sub>      | 2.14, d (1.2)                 | 18.9, CH <sub>3</sub>      | 2.14, d (1.2)                 |
| 17a | 106.9, CH <sub>2</sub>     | 4.89, s                       | 107.6, CH <sub>2</sub>     | 4.93, s                       | 107.4, CH <sub>2</sub>     | 4.92, s                       |
| 17b |                            | 4.54, s                       |                            | 4.57, s                       |                            | 4.56, s                       |
| 18  | 181.2, C                   | –                             | 180.5, C                   | –                             | 180.3, C                   | –                             |
| 19  | 29.6, CH <sub>3</sub>      | 1.20, s                       | 29.5, CH <sub>3</sub>      | 1.26, s                       | 25.0, CH <sub>3</sub>      | 1.30, s                       |
| 20  | 13.4, CH <sub>3</sub>      | 0.65, s                       | 14.2, CH <sub>3</sub>      | 0.66, s                       | 14.2, CH <sub>3</sub>      | 0.67, s                       |

**Table S6.**  $^1\text{H}$  and  $^{13}\text{C}$  NMR Spectroscopic Data for Compounds **11–13** in  $\text{CD}_3\text{OD}$  (125 and 500 MHz).

| no.                 | <b>11</b>                  |                               | <b>12</b>                  |                               | <b>13</b>                  |                               |
|---------------------|----------------------------|-------------------------------|----------------------------|-------------------------------|----------------------------|-------------------------------|
|                     | $\delta_{\text{C}}$ , mult | $\delta_{\text{H}}$ (J in Hz) | $\delta_{\text{C}}$ , mult | $\delta_{\text{H}}$ (J in Hz) | $\delta_{\text{C}}$ , mult | $\delta_{\text{H}}$ (J in Hz) |
| 1a                  | 54.8, CH <sub>2</sub>      | 2.49, m                       | 51.5, CH <sub>2</sub>      | 2.62, m                       | 38.5, CH <sub>2</sub>      | 3.09, d (15.0)                |
| 1b                  |                            | 2.27–2.34, m                  |                            | 2.36, m                       |                            | 2.71, d (15.0)                |
| 2                   | 212.0, C                   | –                             | 194.5, C                   | –                             | 173.9, C                   | –                             |
| 3a                  | 52.2, CH <sub>2</sub>      | 2.75, dd (14.0, 2.1)          | 146.4, C                   | –                             | –                          | –                             |
| 3b                  |                            | 2.27–2.34, m                  |                            |                               |                            |                               |
| 4                   | 48.9, C                    | –                             | 134.7, C                   | –                             | 39.3, CH                   | 2.89, p (7.5)                 |
| 5                   | 56.1, CH                   | 1.92, m                       | 55.0, CH                   | 2.58, d (11.0)                | 52.9, CH                   | 2.66, dd (11.4, 7.5)          |
| 6a                  | 26.9, CH <sub>2</sub>      | 2.15, m                       | 70.2, CH                   | 3.85, td (11.0, 5.1)          | 78.7, CH                   | 4.99, td (11.4, 4.8)          |
| 6b                  |                            | 1.84, m                       |                            |                               |                            |                               |
| 7a                  | 39.0, CH <sub>2</sub>      | 2.45, m                       | 48.8, CH <sub>2</sub>      | 2.77, m                       | 43.0, CH <sub>2</sub>      | 3.03, dd (11.4, 4.8)          |
| 7b                  |                            | 2.06, m                       |                            | 2.15, m                       |                            | 2.25, t (11.4)                |
| 8                   | 148.2, C                   | –                             | 145.0, C                   | –                             | 142.8, C                   | –                             |
| 9                   | 55.4, CH                   | 2.00, m                       | 53.0, CH                   | 2.02, m                       | 49.5, CH                   | 2.48, d (10.6)                |
| 10                  | 45.0, C                    | –                             | 45.0, C                    | –                             | 51.9, C                    | –                             |
| 11a                 | 22.9, CH <sub>2</sub>      | 1.59, m                       | 23.0, CH <sub>2</sub>      | 1.62, m                       | 24.7, CH <sub>2</sub>      | 1.86, m                       |
| 11b                 |                            |                               |                            |                               |                            | 1.46, m                       |
| 12a                 | 40.4, CH <sub>2</sub>      | 2.27–2.34, m                  | 40.3, CH <sub>2</sub>      | 2.36, m                       | 40.5, CH <sub>2</sub>      | 2.34, m                       |
| 12b                 |                            | 2.06, m                       |                            | 2.11, m                       |                            | 2.10, m                       |
| 13                  | 161.5, C                   | –                             | 161.3, C                   | –                             | 160.8, C                   | –                             |
| 14                  | 117.0, CH                  | 5.62, d (1.2)                 | 117.0, CH                  | 5.65, s                       | 117.1, CH                  | 5.62, s                       |
| 15                  | 170.1, C                   | –                             | 170.1, C                   | –                             | 170.1, C                   | –                             |
| 16                  | 18.9, CH <sub>3</sub>      | 2.13, d (1.2)                 | 18.8, CH <sub>3</sub>      | 2.16, d (1.2)                 | 18.9, CH <sub>3</sub>      | 2.15, d (1.2)                 |
| 17a                 | 108.1, CH <sub>2</sub>     | 4.98, s                       | 110.0, CH <sub>2</sub>     | 5.08, s                       | 114.3, CH <sub>2</sub>     | 5.20, s                       |
| 17b                 |                            | 4.62, s                       |                            | 4.72, s                       |                            | 4.88, s                       |
| 18                  | 179.5, C                   | –                             | –                          | –                             | 180.9, C                   | –                             |
| 19                  | 28.3, CH <sub>3</sub>      | 1.35, s                       | 15.3, CH <sub>3</sub>      | 2.10, d (2.0)                 | 10.4, CH <sub>3</sub>      | 1.07, d (7.5)                 |
| 20                  | 14.2, CH <sub>3</sub>      | 0.66, s                       | 14.0, CH <sub>3</sub>      | 0.71, s                       | 173.3, C                   | –                             |
| -COOCH <sub>3</sub> | –                          | –                             | –                          | –                             | 52.2, CH <sub>3</sub>      | 3.65, s                       |

### (A) Actinomycetes

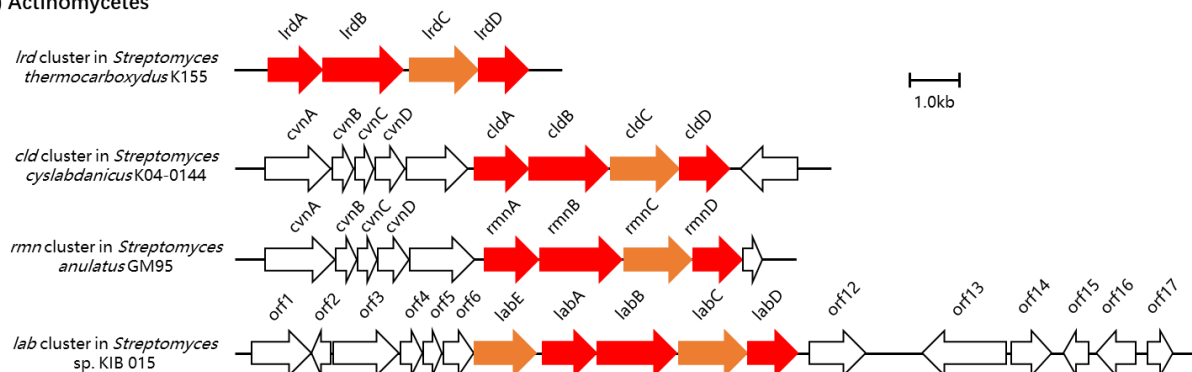

### (B) Fungi

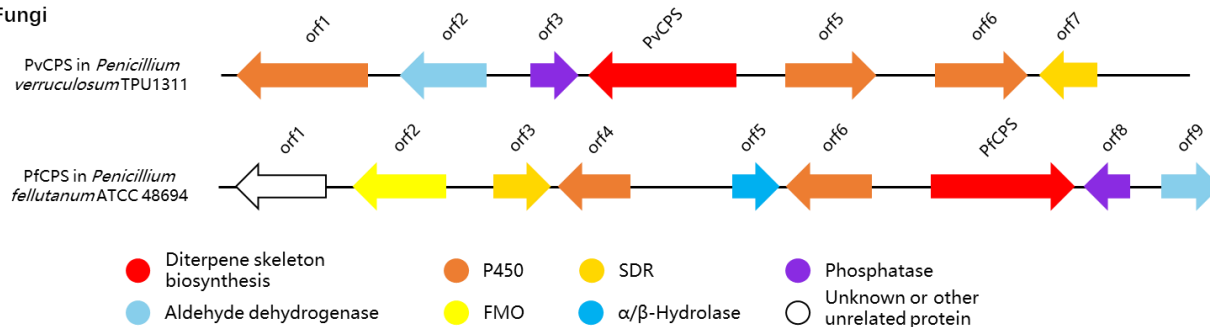

### (C)

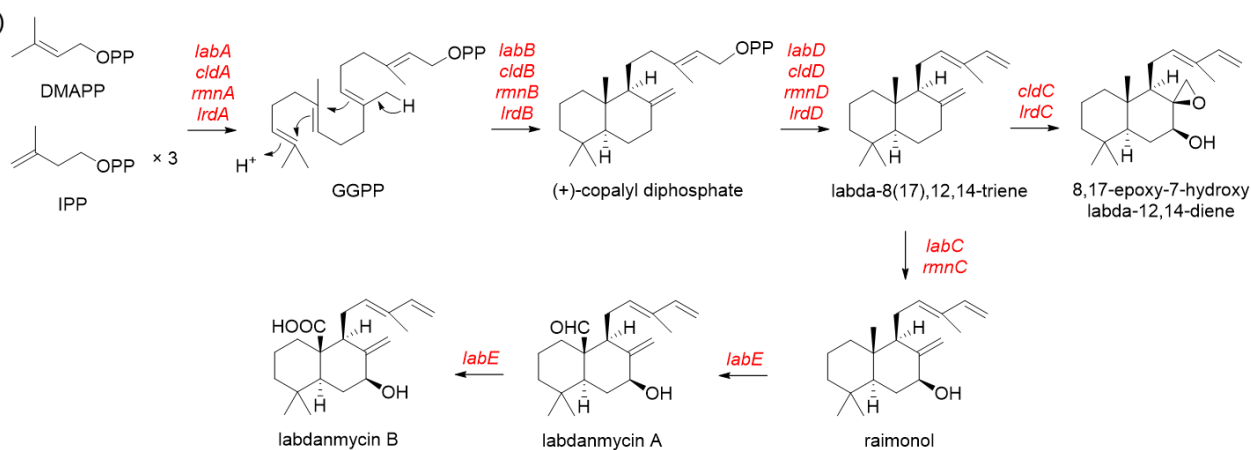

### (D)

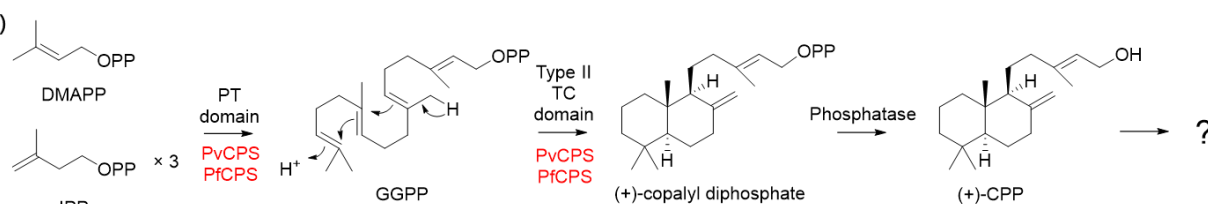

### (E)

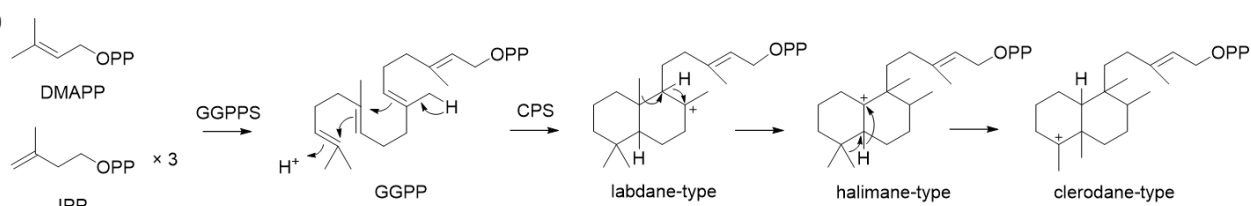

**Figure S1.** Representative labdane diterpenoid biosynthetic gene clusters and their biosynthetic pathways in Actinomycetes, fungi and plants. (A) The *lrd*, *cld*, *rmn* and *lab* BGCs clusters in *Streptomyces*. [16, 20,33]. (B) The BGCs



containing the bifunctional terpene synthase PvCPS and PfCPS in *Penicillium*. [15]. (C) Proposed biosynthetic pathway of labdane-type bicyclic diterpenes catalyzed by *lrd*, *cld*, *rmn* and *lab* BGCs. [16,20,33]. (D) The reactions catalyzed by PvCPS and PfCPS. (E) Biosynthetic pathway of halimane and clerodane diterpenes in plants. [7,18].

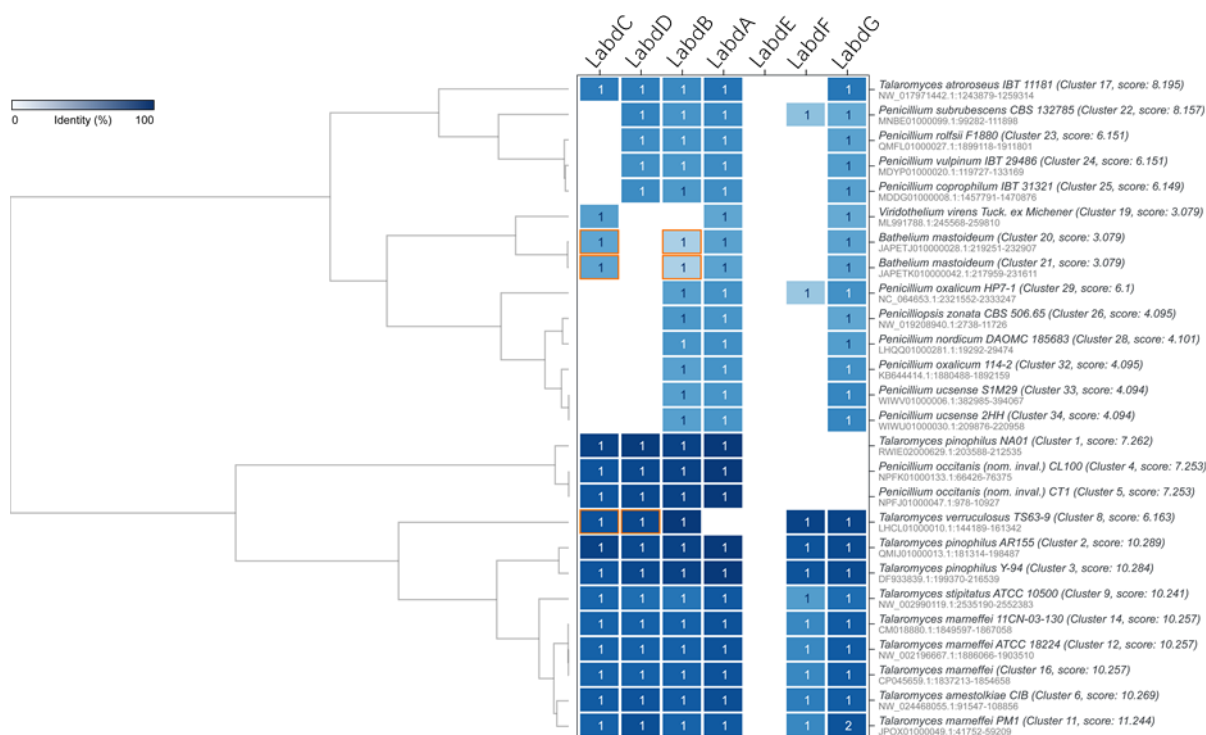

**Figure S2.** Cluster heatmap visualization of cblaster<sup>9</sup> search results using the *labd* cluster to query the fungal genomes from online database.

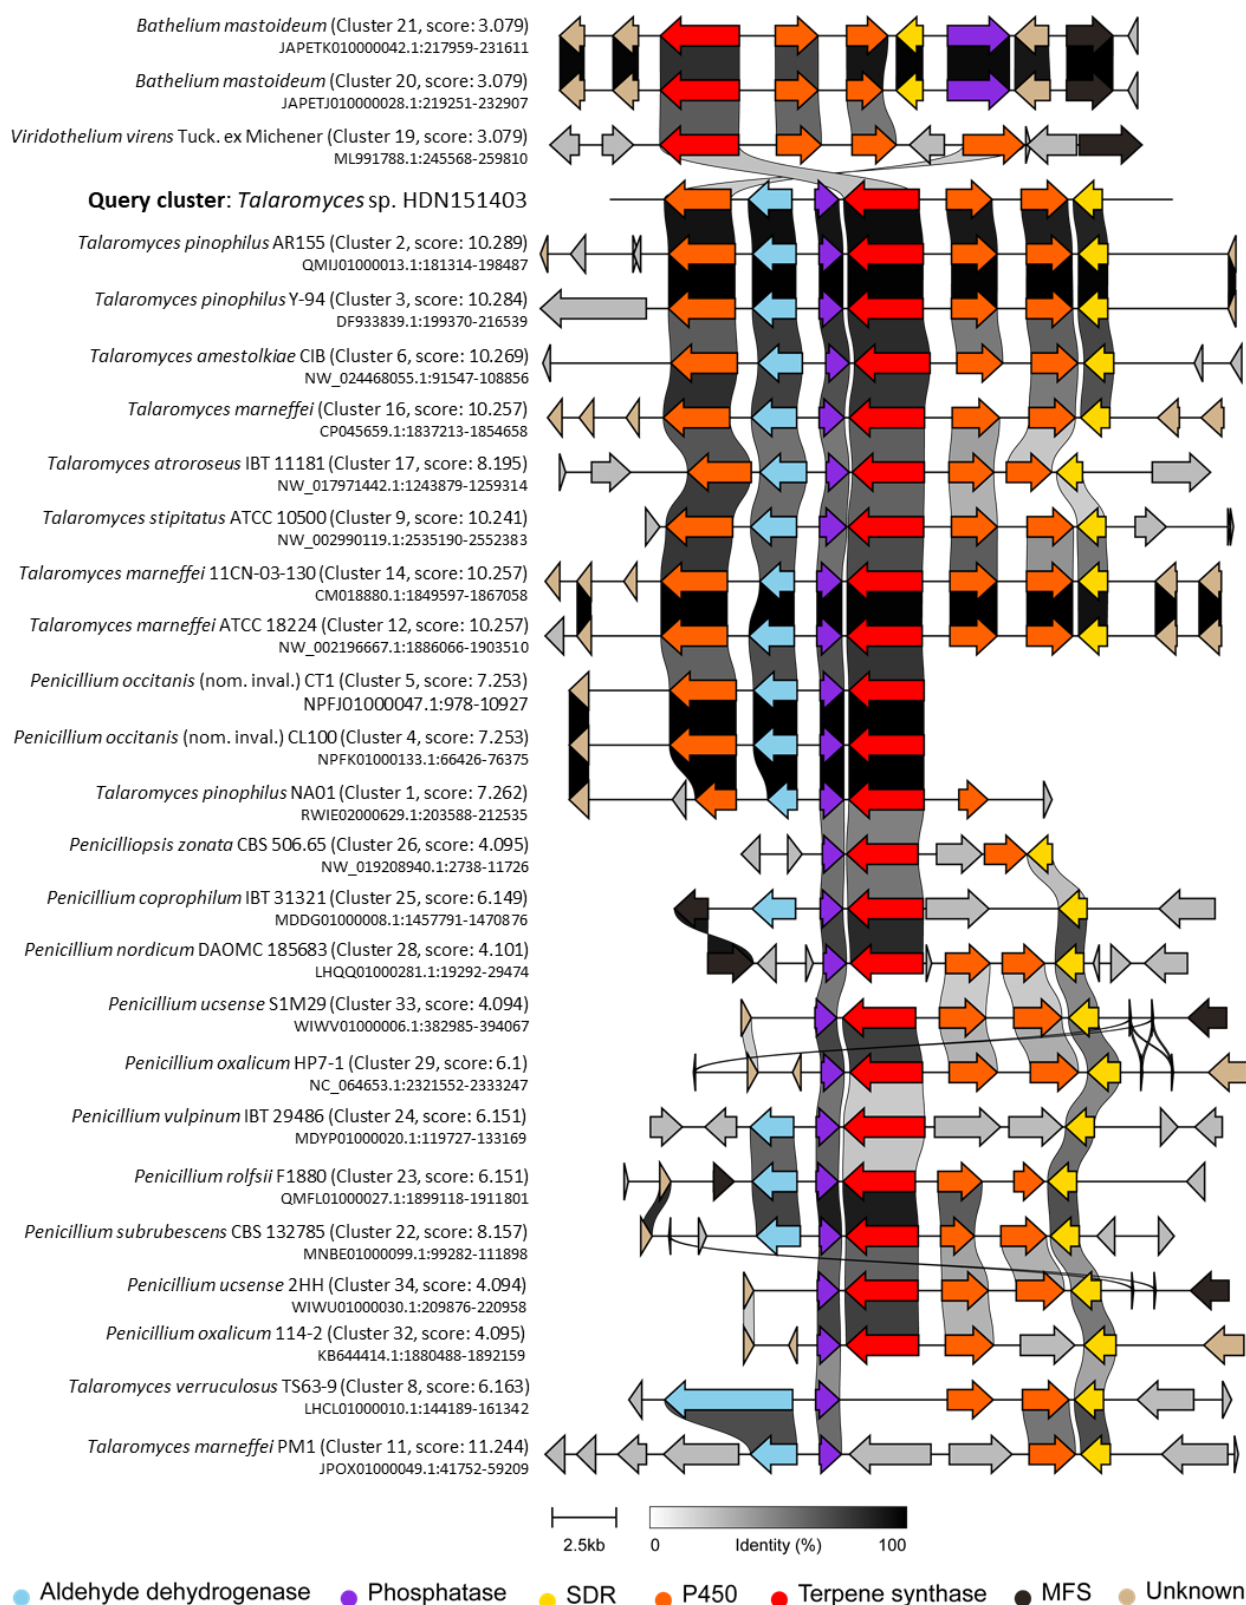

**Figure S3.** Visualization of gene clusters homologous to *labd* cluster searched by cblaster using clinker tool. [23].

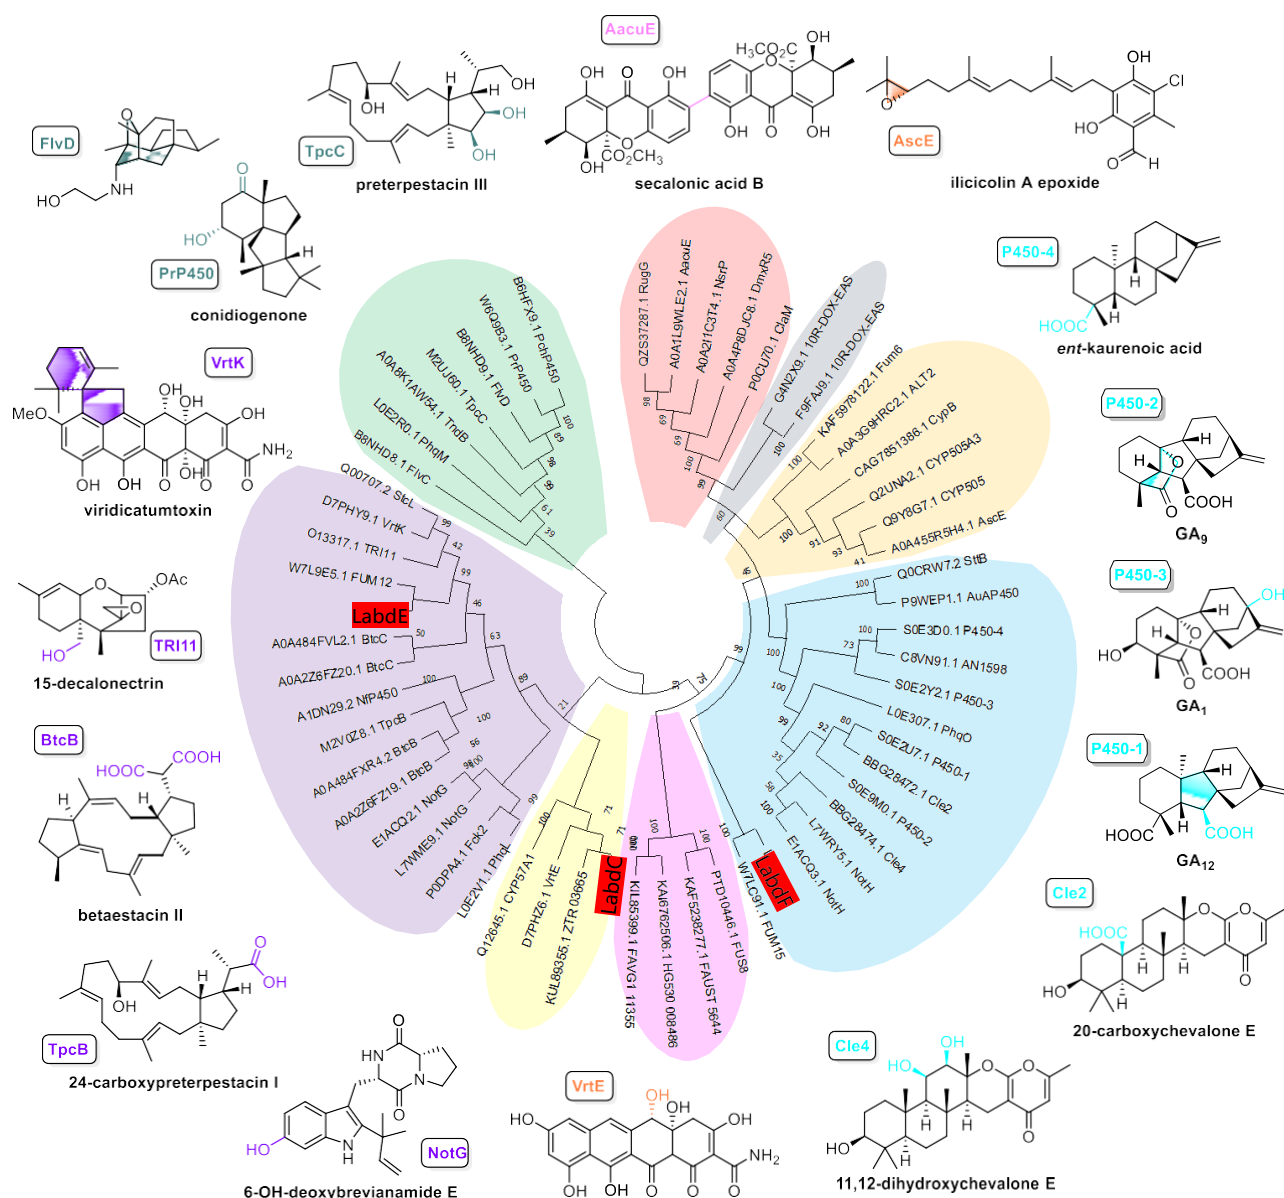

**Figure S4.** Neighbor joining method based phylogenetic analysis of P450s from Ascomycetes fungi using MEGA X software. The bootstrap consensus tree inferred from 1000 replicates is taken to represent the evolutionary history of the taxa analyzed. Protein names and accession numbers are shown at the leaves of the tree. The representative structures are listed in the figure, and the key catalytic sites of the relevant P450 enzymes are highlighted in different colors.

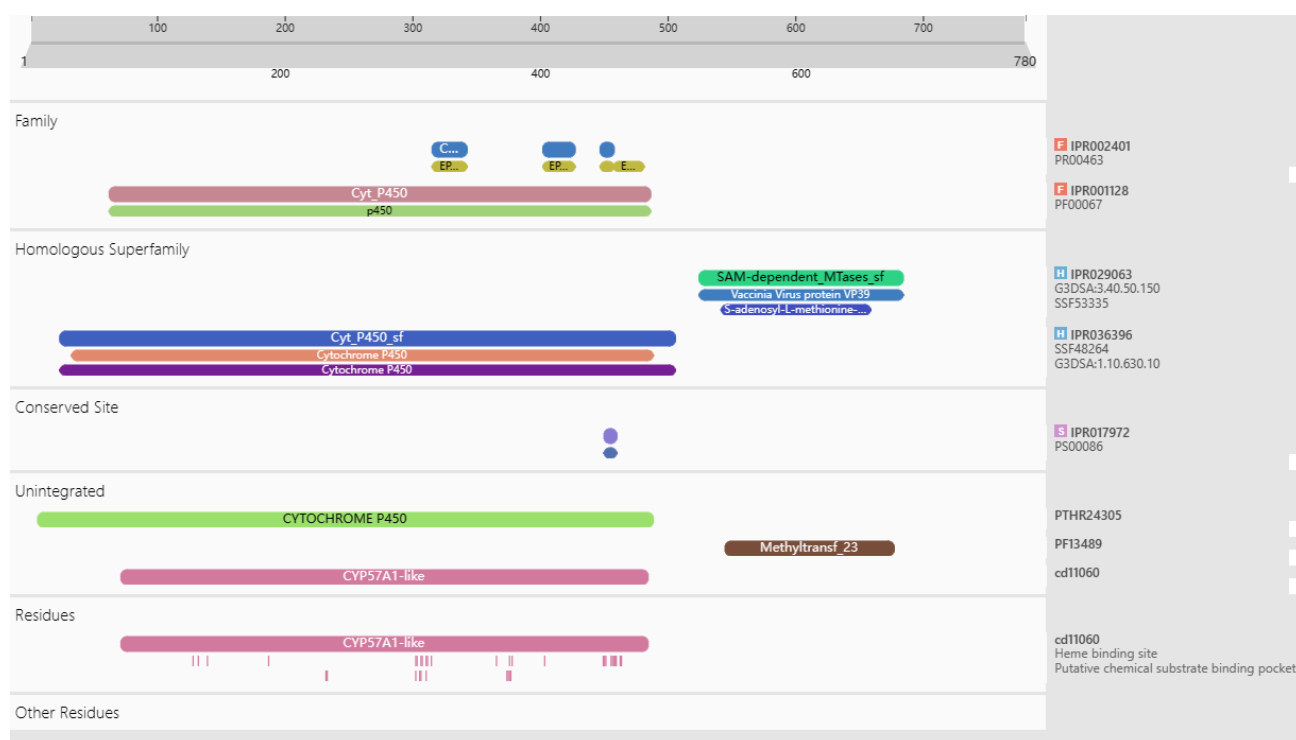

**Figure S5.** Results of protein family classification analysis of LabdC using InterPro database. The results showed that LabdC is a bifunctional P450 enzyme, including two functional domains of cytochrome P450 and methyltransferase.

|   | Description                                                                         | Scientific Name                                     | Max Score | Total Score | Query Cover | E value | Per. Ident | Acc. Len | Accession                      |
|---|-------------------------------------------------------------------------------------|-----------------------------------------------------|-----------|-------------|-------------|---------|------------|----------|--------------------------------|
| ✓ | hypothetical protein ZTR_03665 [Talaromyces verruculosus]                           | <a href="#">Talaromyces verruculosus</a>            | 1578      | 1578        | 100%        | 0.0     | 97.18%     | 1333     | <a href="#">KUI189355.1</a>    |
| ✓ | hypothetical protein TCE0_043r15581 [Talaromyces pinophilus]                        | <a href="#">Talaromyces pinophilus</a>              | 1562      | 1562        | 100%        | 0.0     | 96.04%     | 782      | <a href="#">GAM41998.1</a>     |
| ✓ | Cytochrome P450 [Penicillium occitanis (nom. inval.)]                               | <a href="#">Penicillium occitanis (nom. inval.)</a> | 1561      | 1561        | 100%        | 0.0     | 95.78%     | 782      | <a href="#">PCG99752.1</a>     |
| ✓ | Cytochrome P450 monooxygenase vrtE [Talaromyces pinophilus]                         | <a href="#">Talaromyces pinophilus</a>              | 1538      | 1538        | 100%        | 0.0     | 92.45%     | 808      | <a href="#">KAF3385863.1</a>   |
| ✓ | uncharacterized protein BHO10_008362 [Talaromyces amestolkiae]                      | <a href="#">Talaromyces amestolkiae</a>             | 1521      | 1521        | 100%        | 0.0     | 93.09%     | 782      | <a href="#">XP_040736864.1</a> |
| ✓ | uncharacterized protein FYB26_009327 [Talaromyces marneffei]                        | <a href="#">Talaromyces marneffei</a>               | 1447      | 1447        | 99%         | 0.0     | 89.74%     | 782      | <a href="#">XP_054124552.1</a> |
| ✓ | benzoate 4-monooxygenase cytochrome P450 . putative [Talaromyces stipitatus ATCC... | <a href="#">Talaromyces stipitatus ATCC 10500</a>   | 1444      | 1444        | 100%        | 0.0     | 87.47%     | 782      | <a href="#">XP_002486679.1</a> |
| ✓ | hypothetical protein EIK77_007927 [Talaromyces pinophilus]                          | <a href="#">Talaromyces pinophilus</a>              | 960       | 960         | 61%         | 0.0     | 91.49%     | 517      | <a href="#">KAI7970747.1</a>   |
| ✓ | hypothetical protein UA08_07234 [Talaromyces atroseus]                              | <a href="#">Talaromyces atroseus</a>                | 776       | 1115        | 84%         | 0.0     | 80.17%     | 692      | <a href="#">XP_020117855.1</a> |
| ✓ | cytochrome P450 [Viridothellium virens]                                             | <a href="#">Viridothellium virens</a>               | 650       | 650         | 62%         | 0.0     | 61.81%     | 720      | <a href="#">KAF2235944.1</a>   |
| ✓ | hypothetical protein M1822_007084 [Bathellium mastoideum]                           | <a href="#">Bathellium mastoideum</a>               | 643       | 643         | 63%         | 0.0     | 60.45%     | 810      | <a href="#">KAI9681732.1</a>   |
| ✓ | hypothetical protein M1821_005805 [Bathellium mastoideum]                           | <a href="#">Bathellium mastoideum</a>               | 642       | 642         | 63%         | 0.0     | 60.45%     | 810      | <a href="#">KAI9654811.1</a>   |
| ✓ | uncharacterized protein PgN1_02220 [Pyricularia grisea]                             | <a href="#">Pyricularia grisea</a>                  | 545       | 545         | 62%         | 0.0     | 49.80%     | 501      | <a href="#">XP_030986481.1</a> |
| ✓ | hypothetical protein FGRMN_6520 [Fusarium gramineum]                                | <a href="#">Fusarium gramineum</a>                  | 545       | 545         | 60%         | 0.0     | 50.42%     | 523      | <a href="#">KAF4993391.1</a>   |
| ✓ | uncharacterized protein FTOL_07655 [Fusarium torulosum]                             | <a href="#">Fusarium torulosum</a>                  | 541       | 541         | 59%         | 0.0     | 49.89%     | 480      | <a href="#">SPJ79264.1</a>     |
| ✓ | uncharacterized protein PpBr36_10745 [Pyricularia pennisetigena]                    | <a href="#">Pyricularia pennisetigena</a>           | 532       | 532         | 60%         | 9e-179  | 51.58%     | 501      | <a href="#">XP_029743706.1</a> |
| ✓ | benzoate 4-monooxygenase cytochrome P450 [Pyricularia oryzae]                       | <a href="#">Pyricularia oryzae</a>                  | 527       | 527         | 59%         | 9e-177  | 50.53%     | 501      | <a href="#">KAI7909201.1</a>   |
| ✓ | benzoate 4-monooxygenase cytochrome P450 [Pyricularia oryzae 70-15]                 | <a href="#">Pyricularia oryzae 70-15</a>            | 527       | 527         | 59%         | 1e-176  | 50.53%     | 508      | <a href="#">XP_003720475.1</a> |
| ✓ | hypothetical protein MCOR01_010310 [Pyricularia oryzae]                             | <a href="#">Pyricularia oryzae</a>                  | 525       | 525         | 59%         | 6e-176  | 50.32%     | 501      | <a href="#">KAH8838880.1</a>   |
| ✓ | hypothetical protein PspL_S_10363 [Pyricularia sp. CBS 133598]                      | <a href="#">Pyricularia sp. CBS 133598</a>          | 468       | 468         | 59%         | 2e-154  | 47.77%     | 467      | <a href="#">TLD18038.1</a>     |
| ✓ | hypothetical protein F66182_12136 [Fusarium sp. NRRL 66182]                         | <a href="#">Fusarium sp. NRRL 66182</a>             | 444       | 444         | 28%         | 9e-149  | 95.43%     | 219      | <a href="#">KAF5016246.1</a>   |
| ✓ | hypothetical protein M1820_009678 [Bogoriella megaspora]                            | <a href="#">Bogoriella megaspora</a>                | 456       | 456         | 47%         | 8e-147  | 55.65%     | 646      | <a href="#">KAI9691406.1</a>   |
| ✓ | benzoate 4-monooxygenase cytochrome P450 [Hyaloscypha variabilis F]                 | <a href="#">Hyaloscypha variabilis F</a>            | 384       | 384         | 59%         | 3e-121  | 40.94%     | 489      | <a href="#">PMD45842.1</a>     |
| ✓ | cytochrome P450 [Hyaloscypha hepaticicola]                                          | <a href="#">Hyaloscypha hepaticicola</a>            | 378       | 378         | 60%         | 9e-119  | 39.62%     | 495      | <a href="#">PMD22400.1</a>     |
| ✓ | hypothetical protein B0A52_00440 [Exophiala mesophila]                              | <a href="#">Exophiala mesophila</a>                 | 364       | 364         | 62%         | 3e-113  | 38.49%     | 506      | <a href="#">RVX76083.1</a>     |
| ✓ | hypothetical protein AYO20_04127 [Fonsecaea nubica]                                 | <a href="#">Fonsecaea nubica</a>                    | 362       | 362         | 61%         | 2e-112  | 37.92%     | 519      | <a href="#">XP_022501523.1</a> |
| ✓ | hypothetical protein B0A52_07104 [Exophiala mesophila]                              | <a href="#">Exophiala mesophila</a>                 | 353       | 353         | 61%         | 3e-109  | 36.76%     | 497      | <a href="#">RVX68677.1</a>     |
| ✓ | hypothetical protein FE257_012986 [Aspergillus nanangensis]                         | <a href="#">Aspergillus nanangensis</a>             | 353       | 353         | 61%         | 6e-109  | 35.88%     | 513      | <a href="#">KAF9885369.1</a>   |
| ✓ | hypothetical protein A109_04703 [Exophiala aquamarina CBS 119918]                   | <a href="#">Exophiala aquamarina CBS 119918</a>     | 351       | 351         | 62%         | 2e-108  | 36.73%     | 499      | <a href="#">XP_013262445.1</a> |

**Figure S6.** Protein sequence alignment of LabdC with other homologs using Blastp (protein-protein BLAST).



|   | Description                                                             | Scientific Name                                     | Max Score | Total Score | Query Cover | E value | Per. Ident | Acc. Len | Accession                      |
|---|-------------------------------------------------------------------------|-----------------------------------------------------|-----------|-------------|-------------|---------|------------|----------|--------------------------------|
| ✓ | Isotrichodermin C-15 hydroxylase [Talaromyces pinophilus]               | <a href="#">Talaromyces pinophilus</a>              | 1040      | 1040        | 100%        | 0.0     | 99.80%     | 501      | <a href="#">KAF3385867.1</a>   |
| ✓ | hypothetical protein PFNOC_085340 [Penicillium occitanis (nom. inval.)] | <a href="#">Penicillium occitanis (nom. inval.)</a> | 1038      | 1038        | 100%        | 0.0     | 99.40%     | 501      | <a href="#">PCG93888.1</a>     |
| ✓ | hypothetical protein ZTR_03649 [Talaromyces verrucosus]                 | <a href="#">Talaromyces verrucosus</a>              | 1037      | 1037        | 100%        | 0.0     | 99.60%     | 501      | <a href="#">KUL89333.1</a>     |
| ✓ | uncharacterized protein RHQ10_008366 [Talaromyces amestolkiae]          | <a href="#">Talaromyces amestolkiae</a>             | 1031      | 1031        | 100%        | 0.0     | 98.60%     | 503      | <a href="#">XP_040736868.1</a> |
| ✓ | uncharacterized protein EYB26_009323 [Talaromyces marneffe]             | <a href="#">Talaromyces marneffe</a>                | 996       | 996         | 100%        | 0.0     | 94.21%     | 501      | <a href="#">XP_054124548.1</a> |
| ✓ | cytochrome P450, putative [Talaromyces stipitatus ATCC 10500]           | <a href="#">Talaromyces stipitatus ATCC 10500</a>   | 985       | 985         | 99%         | 0.0     | 94.79%     | 500      | <a href="#">XP_002486675.1</a> |
| ✓ | hypothetical protein UA08_07230 [Talaromyces atroseus]                  | <a href="#">Talaromyces atroseus</a>                | 942       | 942         | 100%        | 0.0     | 92.02%     | 501      | <a href="#">XP_020117851.1</a> |
| ✓ | Isotrichodermin C-15 hydroxylase [Penicillium rolfsii]                  | <a href="#">Penicillium rolfsii</a>                 | 906       | 906         | 97%         | 0.0     | 87.12%     | 497      | <a href="#">KAF3385030.1</a>   |
| ✓ | Averantin hydroxylase [Penicillium vulpinum]                            | <a href="#">Penicillium vulpinum</a>                | 902       | 902         | 98%         | 0.0     | 86.38%     | 497      | <a href="#">XP_057110490.1</a> |
| ✓ | Averantin hydroxylase [Penicillium subrubescens]                        | <a href="#">Penicillium subrubescens</a>            | 899       | 899         | 97%         | 0.0     | 86.91%     | 497      | <a href="#">XP_057003734.1</a> |
| ✓ | Averantin hydroxylase [Penicillium oxalicum]                            | <a href="#">Penicillium oxalicum</a>                | 899       | 899         | 98%         | 0.0     | 86.76%     | 497      | <a href="#">XP_049969383.1</a> |
| ✓ | Averantin hydroxylase [Penicillium cataractarum]                        | <a href="#">Penicillium cataractarum</a>            | 898       | 898         | 97%         | 0.0     | 86.71%     | 497      | <a href="#">XP_056554907.1</a> |
| ✓ | hypothetical protein PDE_07206 [Penicillium oxalicum 114-2]             | <a href="#">Penicillium oxalicum 114-2</a>          | 898       | 898         | 98%         | 0.0     | 86.56%     | 497      | <a href="#">EPS32246.1</a>     |
| ✓ | Averantin hydroxylase [Penicillium tannophilum]                         | <a href="#">Penicillium tannophilum</a>             | 897       | 897         | 97%         | 0.0     | 86.71%     | 497      | <a href="#">KAJ5904104.1</a>   |
| ✓ | Cytochrome P450 monooxygenase [Penicillium ucsense]                     | <a href="#">Penicillium ucsense</a>                 | 893       | 893         | 98%         | 0.0     | 85.98%     | 497      | <a href="#">KAF7719414.1</a>   |
| ✓ | Averantin hydroxylase [Penicillium odoratum]                            | <a href="#">Penicillium odoratum</a>                | 893       | 893         | 98%         | 0.0     | 84.99%     | 504      | <a href="#">XP_056993152.1</a> |
| ✓ | Averantin hydroxylase [Penicillium robsamsonii]                         | <a href="#">Penicillium robsamsonii</a>             | 892       | 892         | 98%         | 0.0     | 85.57%     | 497      | <a href="#">XP_057088019.1</a> |
| ✓ | Averantin hydroxylase [Penicillium glabrum]                             | <a href="#">Penicillium glabrum</a>                 | 892       | 892         | 97%         | 0.0     | 86.09%     | 497      | <a href="#">KAJ5553235.1</a>   |
| ✓ | Averantin hydroxylase [Penicillium diatomitis]                          | <a href="#">Penicillium diatomitis</a>              | 891       | 891         | 98%         | 0.0     | 85.77%     | 497      | <a href="#">XP_056791296.1</a> |
| ✓ | Averantin hydroxylase [Penicillium longicatenatum]                      | <a href="#">Penicillium longicatenatum</a>          | 890       | 890         | 97%         | 0.0     | 87.09%     | 497      | <a href="#">KAJ5664045.1</a>   |
| ✓ | Averantin hydroxylase [Penicillium longicatenatum]                      | <a href="#">Penicillium longicatenatum</a>          | 890       | 890         | 97%         | 0.0     | 87.09%     | 497      | <a href="#">XP_056977175.1</a> |
| ✓ | Averantin hydroxylase [Penicillium concentricum]                        | <a href="#">Penicillium concentricum</a>            | 889       | 889         | 98%         | 0.0     | 85.37%     | 497      | <a href="#">XP_056582103.1</a> |
| ✓ | Averantin hydroxylase [Penicillium lividum]                             | <a href="#">Penicillium lividum</a>                 | 889       | 889         | 98%         | 0.0     | 84.58%     | 504      | <a href="#">KAJ5627861.1</a>   |
| ✓ | Averantin hydroxylase [Penicillium samsonianum]                         | <a href="#">Penicillium samsonianum</a>             | 885       | 885         | 97%         | 0.0     | 85.10%     | 497      | <a href="#">XP_057135627.1</a> |
| ✓ | hypothetical protein ASP2ODRAFT_1503734 [Penicillium zonata CBS 506.65] | <a href="#">Penicillium zonata CBS 506.65</a>       | 885       | 885         | 94%         | 0.0     | 87.26%     | 471      | <a href="#">XP_022576702.1</a> |
| ✓ | Averantin hydroxylase [Penicillium verhagenii]                          | <a href="#">Penicillium verhagenii</a>              | 884       | 884         | 96%         | 0.0     | 86.16%     | 497      | <a href="#">XP_057016147.1</a> |
| ✓ | Averantin hydroxylase [Penicillium glabrum]                             | <a href="#">Penicillium glabrum</a>                 | 882       | 882         | 97%         | 0.0     | 84.88%     | 504      | <a href="#">KAJ5554181.1</a>   |
| ✓ | Averantin hydroxylase [Penicillium sp. IBT 16267x]                      | <a href="#">Penicillium sp. IBT 16267x</a>          | 881       | 881         | 94%         | 0.0     | 87.74%     | 497      | <a href="#">KAJ6109479.1</a>   |
| ✓ | Averantin hydroxylase [Penicillium sp. IBT 35674x]                      | <a href="#">Penicillium sp. IBT 35674x</a>          | 879       | 879         | 94%         | 0.0     | 87.13%     | 497      | <a href="#">KAJ5987131.1</a>   |
| ✓ | Averantin hydroxylase [Penicillium sp. IBT 35674x]                      | <a href="#">Penicillium sp. IBT 35674x</a>          | 879       | 879         | 94%         | 0.0     | 87.13%     | 497      | <a href="#">KAJ5987131.1</a>   |
| ✓ | hypothetical protein ACN38_g11222 [Penicillium nordicum]                | <a href="#">Penicillium nordicum</a>                | 879       | 879         | 97%         | 0.0     | 84.29%     | 497      | <a href="#">KOS37964.1</a>     |
| ✓ | Averantin hydroxylase [Penicillium verrucosum]                          | <a href="#">Penicillium verrucosum</a>              | 878       | 878         | 97%         | 0.0     | 84.29%     | 497      | <a href="#">XP_057076769.1</a> |
| ✓ | Averantin hydroxylase [Penicillium verhagenii]                          | <a href="#">Penicillium verhagenii</a>              | 877       | 877         | 96%         | 0.0     | 86.36%     | 497      | <a href="#">KAJ5937840.1</a>   |
| ✓ | Averantin hydroxylase [Penicillium angulare]                            | <a href="#">Penicillium angulare</a>                | 874       | 874         | 96%         | 0.0     | 85.30%     | 498      | <a href="#">KAJ5114237.1</a>   |
| ✓ | hypothetical protein VN97_g8291 [Penicillium thymicola]                 | <a href="#">Penicillium thymicola</a>               | 874       | 874         | 97%         | 0.0     | 84.29%     | 497      | <a href="#">KAJ9485073.1</a>   |
| ✓ | Averantin hydroxylase [Penicillium pulvis]                              | <a href="#">Penicillium pulvis</a>                  | 801       | 801         | 87%         | 0.0     | 86.10%     | 468      | <a href="#">XP_056924516.1</a> |
| ✓ | hypothetical protein PENCOP_c008G02740 [Penicillium coprophilum]        | <a href="#">Penicillium coprophilum</a>             | 786       | 786         | 84%         | 0.0     | 87.91%     | 446      | <a href="#">OQE38664.1</a>     |
| ✓ | putative cytochrome P450 [Viridothelium virens]                         | <a href="#">Viridothelium virens</a>                | 755       | 755         | 92%         | 0.0     | 76.61%     | 505      | <a href="#">KAF2335947.1</a>   |
| ✓ | hypothetical protein M1820_009681 [Bogoriella megaspora]                | <a href="#">Bogoriella megaspora</a>                | 753       | 753         | 98%         | 0.0     | 72.76%     | 505      | <a href="#">KAJ9691409.1</a>   |
| ✓ | hypothetical protein M1821_005808 [Bathelium mastoideum]                | <a href="#">Bathelium mastoideum</a>                | 746       | 746         | 93%         | 0.0     | 75.11%     | 498      | <a href="#">KAJ9654814.1</a>   |
| ✓ | hypothetical protein M1822_007087 [Bathelium mastoideum]                | <a href="#">Bathelium mastoideum</a>                | 745       | 745         | 93%         | 0.0     | 75.11%     | 498      | <a href="#">KAJ9681735.1</a>   |
| ✓ | Isotrichodermin C-15 hydroxylase [Penicillium subrubescens]             | <a href="#">Penicillium subrubescens</a>            | 695       | 695         | 76%         | 0.0     | 86.20%     | 402      | <a href="#">OKP14338.1</a>     |
| ✓ | hypothetical protein EIK77_007931 [Talaromyces pinophilus]              | <a href="#">Talaromyces pinophilus</a>              | 686       | 686         | 66%         | 0.0     | 97.94%     | 359      | <a href="#">KAJ7970751.1</a>   |
| ✓ | uncharacterized protein N7510_007632 [Penicillium lagena]               | <a href="#">Penicillium lagena</a>                  | 530       | 530         | 98%         | 0.0     | 53.55%     | 498      | <a href="#">XP_056832600.1</a> |
| ✓ | Cytochrome p450 protein [Lasiodiplodia theobromae]                      | <a href="#">Lasiodiplodia theobromae</a>            | 525       | 525         | 96%         | 3e-180  | 52.47%     | 491      | <a href="#">XP_035367558.1</a> |
| ✓ | Cytochrome P450 monooxygenase hmp1 [Lasiodiplodia hormozganensis]       | <a href="#">Lasiodiplodia hormozganensis</a>        | 524       | 524         | 96%         | 1e-179  | 52.36%     | 491      | <a href="#">KAK0647576.1</a>   |
| ✓ | Cytochrome p450 protein [Neofusicoccum parvum]                          | <a href="#">Neofusicoccum parvum</a>                | 516       | 516         | 94%         | 3e-176  | 51.26%     | 529      | <a href="#">GME59351.1</a>     |
| ✓ | putative cytochrome p450 protein [Neofusicoccum parvum UCRNP2]          | <a href="#">Neofusicoccum parvum UCRNP2</a>         | 515       | 515         | 94%         | 1e-175  | 51.26%     | 529      | <a href="#">EOD48095.1</a>     |
| ✓ | Cytochrome p450 protein [Neofusicoccum parvum]                          | <a href="#">Neofusicoccum parvum</a>                | 513       | 513         | 94%         | 5e-175  | 51.05%     | 529      | <a href="#">GME34285.1</a>     |
| ✓ | putative cytochrome P450 [Pestalotiopsis sp. NC0098]                    | <a href="#">Pestalotiopsis sp. NC0098</a>           | 508       | 508         | 92%         | 1e-173  | 51.84%     | 488      | <a href="#">KAJ0146810.1</a>   |
| ✓ | putative cytochrome P450 [Corynespora cassicola Philippines]            | <a href="#">Corynespora cassicola Philippines</a>   | 505       | 505         | 97%         | 2e-172  | 51.53%     | 490      | <a href="#">PSN63043.1</a>     |
| ✓ | hypothetical protein PFICI_06539 [Pestalotiopsis fici W106-1]           | <a href="#">Pestalotiopsis fici W106-1</a>          | 503       | 503         | 93%         | 2e-171  | 51.17%     | 490      | <a href="#">XP_007833311.1</a> |
| ✓ | Cytochrome p450 protein [Lasiodiplodia theobromae]                      | <a href="#">Lasiodiplodia theobromae</a>            | 502       | 502         | 96%         | 2e-171  | 49.38%     | 476      | <a href="#">XP_035368502.1</a> |
| ✓ | Heterokaryon incompatibility [Botryosphaeria dothidea]                  | <a href="#">Botryosphaeria dothidea</a>             | 493       | 493         | 93%         | 2e-167  | 51.06%     | 499      | <a href="#">KAF4300746.1</a>   |
| ✓ | hypothetical protein PFICI_06539 [Neofusicoccum parvum]                 | <a href="#">Neofusicoccum parvum</a>                | 492       | 492         | 93%         | 3e-167  | 49.89%     | 494      | <a href="#">GME59698.1</a>     |
| ✓ | hypothetical protein S40288_03084 [Stachybotrys chartarum IBT 40288]    | <a href="#">Stachybotrys chartarum IBT 40288</a>    | 493       | 493         | 92%         | 3e-167  | 50.64%     | 500      | <a href="#">KFA77429.1</a>     |
| ✓ | hypothetical protein S7711_03465 [Stachybotrys chartarum IBT 7711]      | <a href="#">Stachybotrys chartarum IBT 7711</a>     | 491       | 491         | 92%         | 8e-167  | 50.43%     | 500      | <a href="#">KEY64172.1</a>     |
| ✓ | Isotrichodermin C-15 hydroxylase [Diplodia seriata]                     | <a href="#">Diplodia seriata</a>                    | 488       | 488         | 96%         | 9e-166  | 49.48%     | 491      | <a href="#">OMP83594.1</a>     |

**Figure S7.** Protein sequence alignment of LabdE with other homologs using Blastp (protein-protein BLAST).

|   | Description                                                                   | Scientific Name                                     | Max Score | Total Score | Query Cover | E value | Per. Ident | Acc. Len | Accession                      |
|---|-------------------------------------------------------------------------------|-----------------------------------------------------|-----------|-------------|-------------|---------|------------|----------|--------------------------------|
| ✓ | hypothetical protein ZTR_03650 [Talaromyces verruculosus]                     | <a href="#">Talaromyces verruculosus</a>            | 1086      | 1086        | 100%        | 0.0     | 97.23%     | 542      | <a href="#">KUL89225.1</a>     |
| ✓ | hypothetical protein PENQC_085350 [Penicillium occitanis (nom. inval.)]       | <a href="#">Penicillium occitanis (nom. inval.)</a> | 1068      | 1068        | 100%        | 0.0     | 95.39%     | 542      | <a href="#">PCG93889.1</a>     |
| ✓ | hypothetical protein TCE0_043f15589 [Talaromyces pinophilus]                  | <a href="#">Talaromyces pinophilus</a>              | 1060      | 1060        | 100%        | 0.0     | 95.20%     | 540      | <a href="#">GAM42003.1</a>     |
| ✓ | uncharacterized protein BHQ10_008367 [Talaromyces amestolkiae]                | <a href="#">Talaromyces amestolkiae</a>             | 1021      | 1021        | 100%        | 0.0     | 90.28%     | 545      | <a href="#">XP_040736869.1</a> |
| ✓ | uncharacterized protein EYB26_009322 [Talaromyces marneffe]                   | <a href="#">Talaromyces marneffe</a>                | 1005      | 1005        | 100%        | 0.0     | 88.56%     | 542      | <a href="#">XP_054124547.1</a> |
| ✓ | cytochrome P450, putative [Talaromyces stipitatus ATCC 10500]                 | <a href="#">Talaromyces stipitatus ATCC 10500</a>   | 929       | 929         | 100%        | 0.0     | 82.87%     | 543      | <a href="#">XP_002486674.1</a> |
| ✓ | hypothetical protein UA08_07229 [Talaromyces atroseus]                        | <a href="#">Talaromyces atroseus</a>                | 831       | 831         | 94%         | 0.0     | 77.93%     | 518      | <a href="#">XP_020117852.1</a> |
| ✓ | Cytochrome P450 3A12 [Talaromyces pinophilus]                                 | <a href="#">Talaromyces pinophilus</a>              | 802       | 802         | 77%         | 0.0     | 93.57%     | 422      | <a href="#">KAF3385868.1</a>   |
| ✓ | hypothetical protein N7451_011497 [Penicillium sp. IBT 35674x]                | <a href="#">Penicillium sp. IBT 35674x</a>          | 751       | 751         | 99%         | 0.0     | 67.96%     | 534      | <a href="#">KAJ5987132.1</a>   |
| ✓ | hypothetical protein N7486_001713 [Penicillium sp. IBT 16267x]                | <a href="#">Penicillium sp. IBT 16267x</a>          | 751       | 751         | 99%         | 0.0     | 67.47%     | 534      | <a href="#">KAJ6109478.1</a>   |
| ✓ | hypothetical protein N7494_002614 [Penicillium glabrum]                       | <a href="#">Penicillium glabrum</a>                 | 749       | 749         | 99%         | 0.0     | 67.28%     | 534      | <a href="#">KAJ5553236.1</a>   |
| ✓ | hypothetical protein N7504_006488 [Penicillium tannophilum]                   | <a href="#">Penicillium tannophilum</a>             | 749       | 749         | 99%         | 0.0     | 67.65%     | 544      | <a href="#">KAJ5904105.1</a>   |
| ✓ | uncharacterized protein N7503_004055 [Penicillium pulvis]                     | <a href="#">Penicillium pulvis</a>                  | 748       | 748         | 99%         | 0.0     | 67.46%     | 534      | <a href="#">XP_056924517.1</a> |
| ✓ | uncharacterized protein N7520_009929 [Penicillium odoratum]                   | <a href="#">Penicillium odoratum</a>                | 748       | 748         | 99%         | 0.0     | 67.83%     | 537      | <a href="#">XP_056993151.1</a> |
| ✓ | hypothetical protein N7513_004139 [Penicillium glabrum]                       | <a href="#">Penicillium glabrum</a>                 | 748       | 748         | 99%         | 0.0     | 67.10%     | 534      | <a href="#">KAJ5554180.1</a>   |
| ✓ | hypothetical protein N7454_004183 [Penicillium verhagenii]                    | <a href="#">Penicillium verhagenii</a>              | 748       | 748         | 99%         | 0.0     | 67.78%     | 536      | <a href="#">KAJ5937841.1</a>   |
| ✓ | uncharacterized protein N7496_006566 [Penicillium cataractarum]               | <a href="#">Penicillium cataractarum</a>            | 743       | 743         | 99%         | 0.0     | 67.03%     | 535      | <a href="#">XP_056554908.1</a> |
| ✓ | hypothetical protein N7490_010090 [Penicillium lividum]                       | <a href="#">Penicillium lividum</a>                 | 739       | 739         | 99%         | 0.0     | 68.26%     | 537      | <a href="#">KAJ5627862.1</a>   |
| ✓ | uncharacterized protein N7473_011946 [Penicillium subrubescens]               | <a href="#">Penicillium subrubescens</a>            | 739       | 739         | 99%         | 0.0     | 66.98%     | 535      | <a href="#">XP_057003735.1</a> |
| ✓ | uncharacterized protein N7471_008649 [Penicillium samsonianum]                | <a href="#">Penicillium samsonianum</a>             | 738       | 738         | 99%         | 0.0     | 67.53%     | 540      | <a href="#">XP_057135628.1</a> |
| ✓ | uncharacterized protein N7479_003469 [Penicillium vulpinum]                   | <a href="#">Penicillium vulpinum</a>                | 738       | 738         | 99%         | 0.0     | 67.89%     | 540      | <a href="#">XP_057110491.1</a> |
| ✓ | uncharacterized protein N7517_000237 [Penicillium concentricum]               | <a href="#">Penicillium concentricum</a>            | 732       | 732         | 99%         | 0.0     | 67.71%     | 540      | <a href="#">XP_056582102.1</a> |
| ✓ | Cytochrome P450 monooxygenase [Penicillium ucsense]                           | <a href="#">Penicillium ucsense</a>                 | 731       | 731         | 99%         | 0.0     | 66.61%     | 539      | <a href="#">KAF7719415.1</a>   |
| ✓ | Cytochrome P450 3A13 [Penicillium subrubescens]                               | <a href="#">Penicillium subrubescens</a>            | 728       | 728         | 99%         | 0.0     | 64.58%     | 553      | <a href="#">OKP14337.1</a>     |
| ✓ | hypothetical protein POX_d05589 [Penicillium oxalicum]                        | <a href="#">Penicillium oxalicum</a>                | 727       | 727         | 98%         | 0.0     | 66.85%     | 535      | <a href="#">XP_049969382.1</a> |
| ✓ | uncharacterized protein N7516_002167 [Penicillium verrucosum]                 | <a href="#">Penicillium verrucosum</a>              | 726       | 726         | 99%         | 0.0     | 66.91%     | 540      | <a href="#">XP_057076770.1</a> |
| ✓ | uncharacterized protein ASPVEDRAFT_138421 [Aspergillus versicolor CBS 583.65] | <a href="#">Aspergillus versicolor CBS 583.65</a>   | 725       | 725         | 99%         | 0.0     | 65.99%     | 541      | <a href="#">XP_040671551.1</a> |
| ✓ | hypothetical protein N7507_004777 [Penicillium longicatenatum]                | <a href="#">Penicillium longicatenatum</a>          | 724       | 724         | 90%         | 0.0     | 70.06%     | 508      | <a href="#">KAJ5664046.1</a>   |
| ✓ | uncharacterized protein N7447_004402 [Penicillium robsamsonii]                | <a href="#">Penicillium robsamsonii</a>             | 720       | 720         | 99%         | 0.0     | 67.53%     | 540      | <a href="#">XP_057088018.1</a> |
| ✓ | uncharacterized protein N7447_004402 [Penicillium robsamsonii]                | <a href="#">Penicillium robsamsonii</a>             | 720       | 720         | 99%         | 0.0     | 67.53%     | 540      | <a href="#">XP_057088018.1</a> |
| ✓ | hypothetical protein PDE_07207 [Penicillium oxalicum 114-2]                   | <a href="#">Penicillium oxalicum 114-2</a>          | 716       | 716         | 92%         | 0.0     | 69.50%     | 506      | <a href="#">EPS32247.1</a>     |
| ✓ | hypothetical protein N7456_002772 [Penicillium angulare]                      | <a href="#">Penicillium angulare</a>                | 700       | 700         | 98%         | 0.0     | 67.22%     | 537      | <a href="#">KAJ5114238.1</a>   |
| ✓ | uncharacterized protein N7539_004152 [Penicillium diatomitis]                 | <a href="#">Penicillium diatomitis</a>              | 691       | 691         | 88%         | 0.0     | 70.15%     | 494      | <a href="#">XP_056791295.1</a> |
| ✓ | uncharacterized protein N7466_011027 [Penicillium verhagenii]                 | <a href="#">Penicillium verhagenii</a>              | 668       | 668         | 89%         | 0.0     | 66.74%     | 494      | <a href="#">XP_057016148.1</a> |
| ✓ | hypothetical protein ACN38_g11223 [Penicillium nordicum]                      | <a href="#">Penicillium nordicum</a>                | 646       | 646         | 89%         | 0.0     | 65.92%     | 489      | <a href="#">KCS37976.1</a>     |
| ✓ | hypothetical protein VN97_g8292 [Penicillium thymicola]                       | <a href="#">Penicillium thymicola</a>               | 642       | 642         | 89%         | 0.0     | 65.78%     | 489      | <a href="#">KAJ9485072.1</a>   |
| ✓ | hypothetical protein EIK77_007932 [Talaromyces pinophilus]                    | <a href="#">Talaromyces pinophilus</a>              | 638       | 638         | 59%         | 0.0     | 95.65%     | 336      | <a href="#">KAI7970752.1</a>   |
| ✓ | hypothetical protein ASP2ODRAFT_77483 [Penicillioopsis zonata CBS 506.65]     | <a href="#">Penicillioopsis zonata CBS 506.65</a>   | 634       | 634         | 92%         | 0.0     | 61.90%     | 514      | <a href="#">XP_022576701.1</a> |
| ✓ | putative cytochrome P450 [Viridothellium virens]                              | <a href="#">Viridothellium virens</a>               | 580       | 580         | 91%         | 0.0     | 58.37%     | 496      | <a href="#">KAF2235946.1</a>   |
| ✓ | cytochrome p450 [Lasallia pustulata]                                          | <a href="#">Lasallia pustulata</a>                  | 568       | 568         | 96%         | 0.0     | 51.87%     | 543      | <a href="#">SLM39940.1</a>     |
| ✓ | cytochrome P450 [Lasallia pustulata]                                          | <a href="#">Lasallia pustulata</a>                  | 565       | 565         | 96%         | 0.0     | 51.50%     | 543      | <a href="#">KAA6413515.1</a>   |
| ✓ | hypothetical protein [Hypocenomyces scalaris]                                 | <a href="#">Hypocenomyces scalaris</a>              | 555       | 555         | 97%         | 0.0     | 52.04%     | 545      | <a href="#">MCJ1304961.1</a>   |
| ✓ | hypothetical protein LQ347_000766 [Umbilicaria vellea]                        | <a href="#">Umbilicaria vellea</a>                  | 555       | 555         | 93%         | 0.0     | 52.05%     | 545      | <a href="#">KAI4135313.1</a>   |
| ✓ | hypothetical protein M1821_005807 [Bathelium mastoideum]                      | <a href="#">Bathelium mastoideum</a>                | 552       | 552         | 86%         | 0.0     | 57.69%     | 463      | <a href="#">KAI9654813.1</a>   |
| ✓ | hypothetical protein M1820_009680 [Bogoriella megaspora]                      | <a href="#">Bogoriella megaspora</a>                | 550       | 550         | 86%         | 0.0     | 56.84%     | 466      | <a href="#">KAI9691408.1</a>   |
| ✓ | hypothetical protein [Lignoscripta atroalba]                                  | <a href="#">Lignoscripta atroalba</a>               | 545       | 545         | 96%         | 0.0     | 50.18%     | 548      | <a href="#">MCJ1254213.1</a>   |
| ✓ | hypothetical protein [Acarospora aff. strigata]                               | <a href="#">Acarospora aff. strigata</a>            | 541       | 541         | 99%         | 0.0     | 49.18%     | 547      | <a href="#">MCJ1362699.1</a>   |
| ✓ | cytochrome P450 [Saccharata proteae CBS 121410]                               | <a href="#">Saccharata proteae CBS 121410</a>       | 538       | 538         | 93%         | 0.0     | 51.76%     | 542      | <a href="#">KAF2092013.1</a>   |
| ✓ | hypothetical protein B0A49_00372 [Cryomyces minteri]                          | <a href="#">Cryomyces minteri</a>                   | 537       | 537         | 99%         | 0.0     | 51.38%     | 541      | <a href="#">TKA81886.1</a>     |
| ✓ | uncharacterized protein HO173_001655 [Letharia columbiana]                    | <a href="#">Letharia columbiana</a>                 | 536       | 536         | 97%         | 0.0     | 49.81%     | 546      | <a href="#">XP_037169314.1</a> |
| ✓ | hypothetical protein [Lobaria immixta]                                        | <a href="#">Lobaria immixta</a>                     | 535       | 535         | 98%         | 0.0     | 47.91%     | 547      | <a href="#">MCJ1266096.1</a>   |
| ✓ | hypothetical protein [Xylographa bjoerkii]                                    | <a href="#">Xylographa bjoerkii</a>                 | 535       | 535         | 91%         | 0.0     | 50.79%     | 548      | <a href="#">MCJ1387575.1</a>   |
| ✓ | hypothetical protein [Ptychographa xylographoides]                            | <a href="#">Ptychographa xylographoides</a>         | 533       | 533         | 98%         | 0.0     | 49.36%     | 548      | <a href="#">MCJ1406239.1</a>   |
| ✓ | hypothetical protein [Xylographa cameopallida]                                | <a href="#">Xylographa cameopallida</a>             | 533       | 533         | 96%         | 0.0     | 48.89%     | 548      | <a href="#">MCJ1295844.1</a>   |
| ✓ | hypothetical protein L6R40_003711 [Xanthomendoza cf. fulva]                   | <a href="#">Xanthomendoza cf. fulva</a>             | 532       | 532         | 95%         | 0.0     | 50.19%     | 547      | <a href="#">KAI4243020.1</a>   |
| ✓ | Cytochrome P450 3A13 [Penicillium rolfsii]                                    | <a href="#">Penicillium rolfsii</a>                 | 528       | 528         | 69%         | 0.0     | 67.09%     | 392      | <a href="#">KAF3385029.1</a>   |
| ✓ | hypothetical protein [Xylographa vitilligo]                                   | <a href="#">Xylographa vitilligo</a>                | 530       | 530         | 95%         | 1e-180  | 48.69%     | 548      | <a href="#">MCJ1316429.1</a>   |
| ✓ | hypothetical protein M1833_006363 [Piccolia ochrophora]                       | <a href="#">Piccolia ochrophora</a>                 | 529       | 529         | 91%         | 3e-180  | 51.29%     | 544      | <a href="#">KAJ9796358.1</a>   |
| ✓ | uncharacterized protein HO133_007892 [Letharia lupina]                        | <a href="#">Letharia lupina</a>                     | 528       | 528         | 97%         | 4e-180  | 49.26%     | 546      | <a href="#">XP_037156096.1</a> |

**Figure S8.** Protein sequence alignment of LabdF with other homologs using Blastp (protein-protein BLAST).



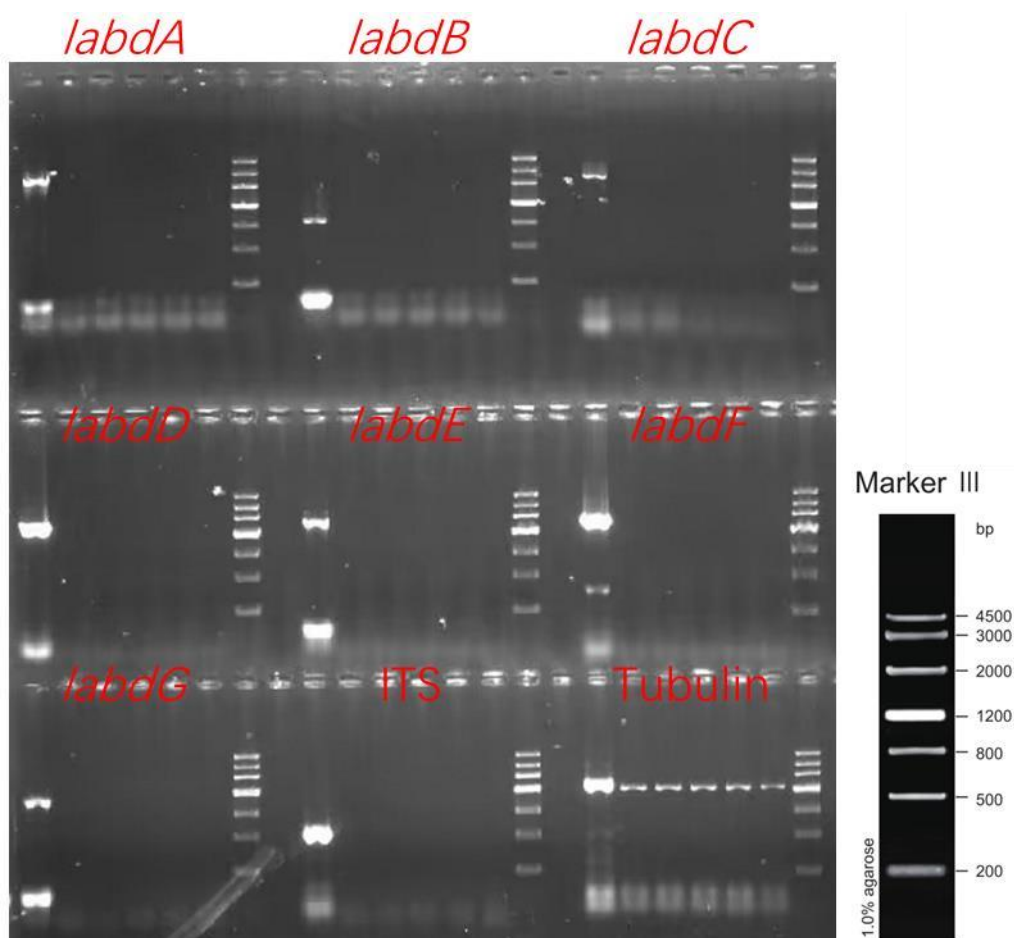

**Figure S9.** RT-PCR results of *labd* cluster of *Talaromyces* sp. HDN 151403 under different laboratory culture conditions. The PCR templates from left to right are: gDNA of *Talaromyces* sp. HDN 151403, cDNA of *Talaromyces* sp. HDN 151403 from five different media: PDB, fungal modified No. 2 medium, rice medium, glycerol medium, and trypticase (tryptic) soy broth.

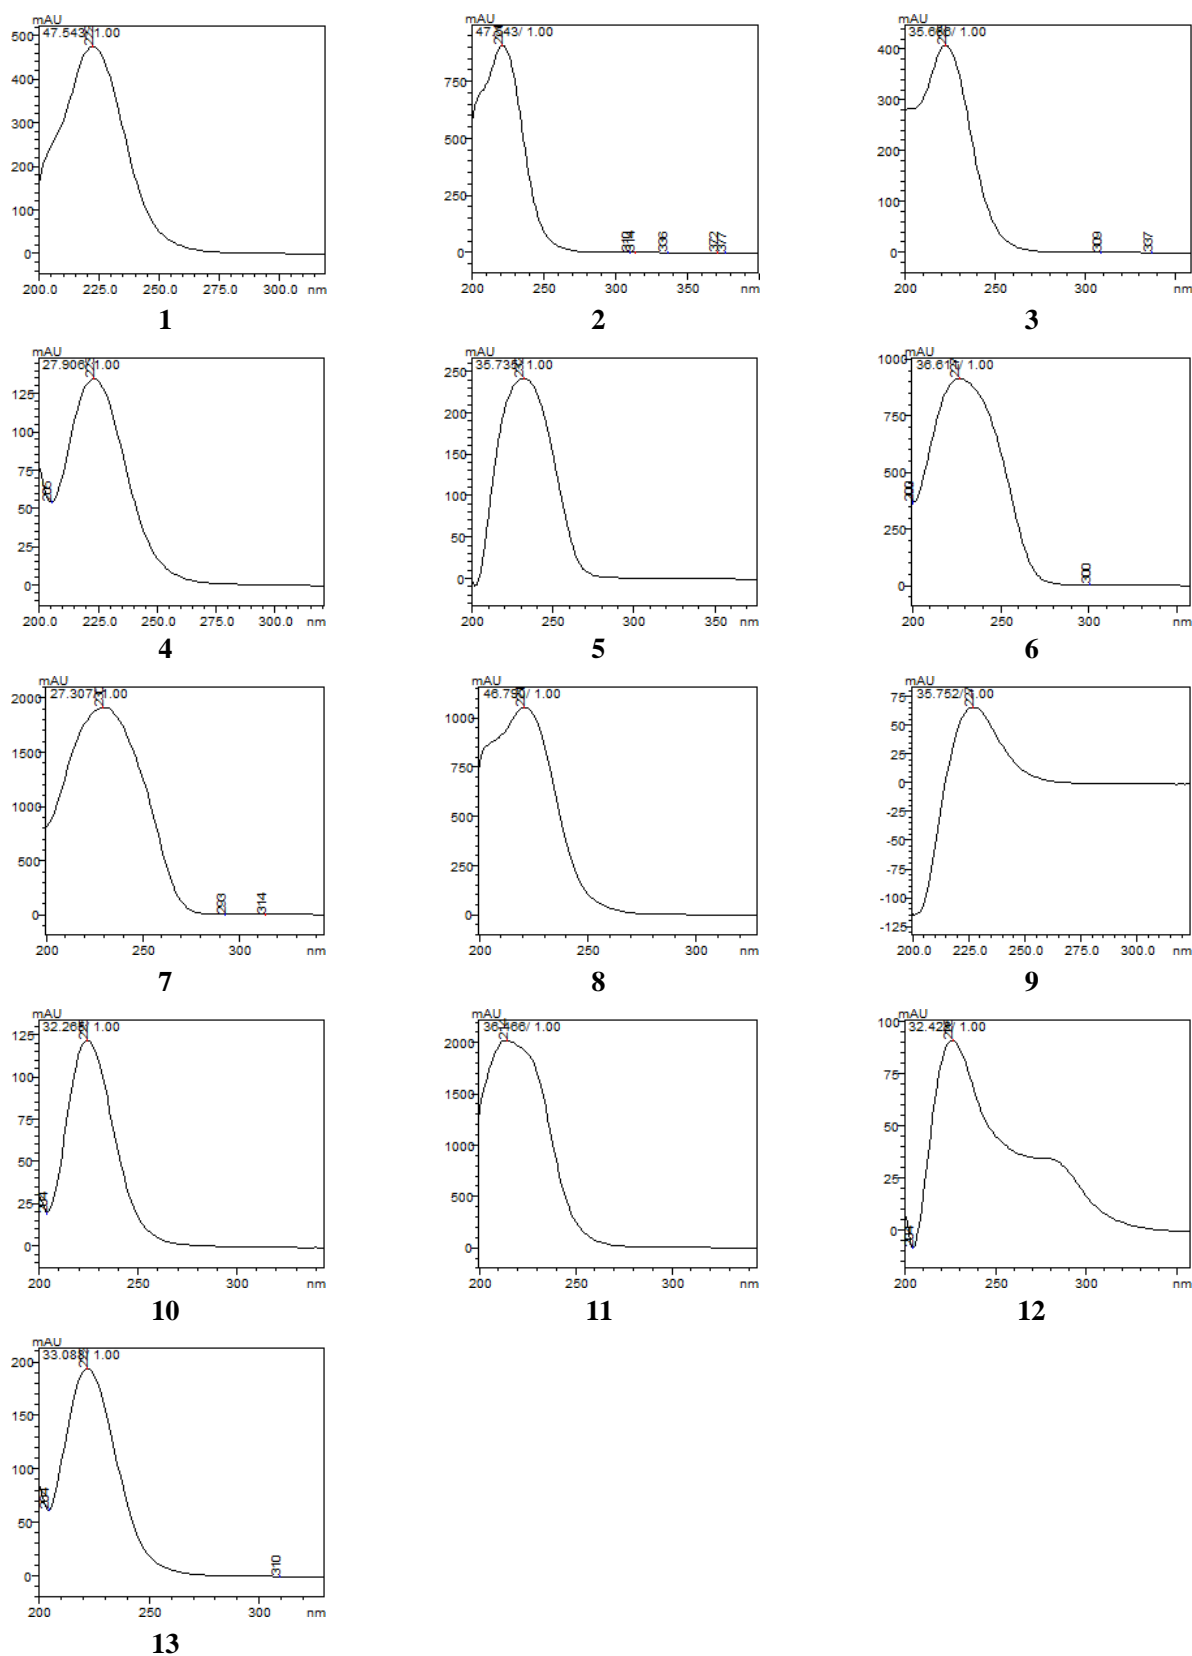

**Figure S10.** UV-vis spectra of purified compounds. All spectra were measured with a Shimadzu UFLC system equipped with a variable wavelength detector.

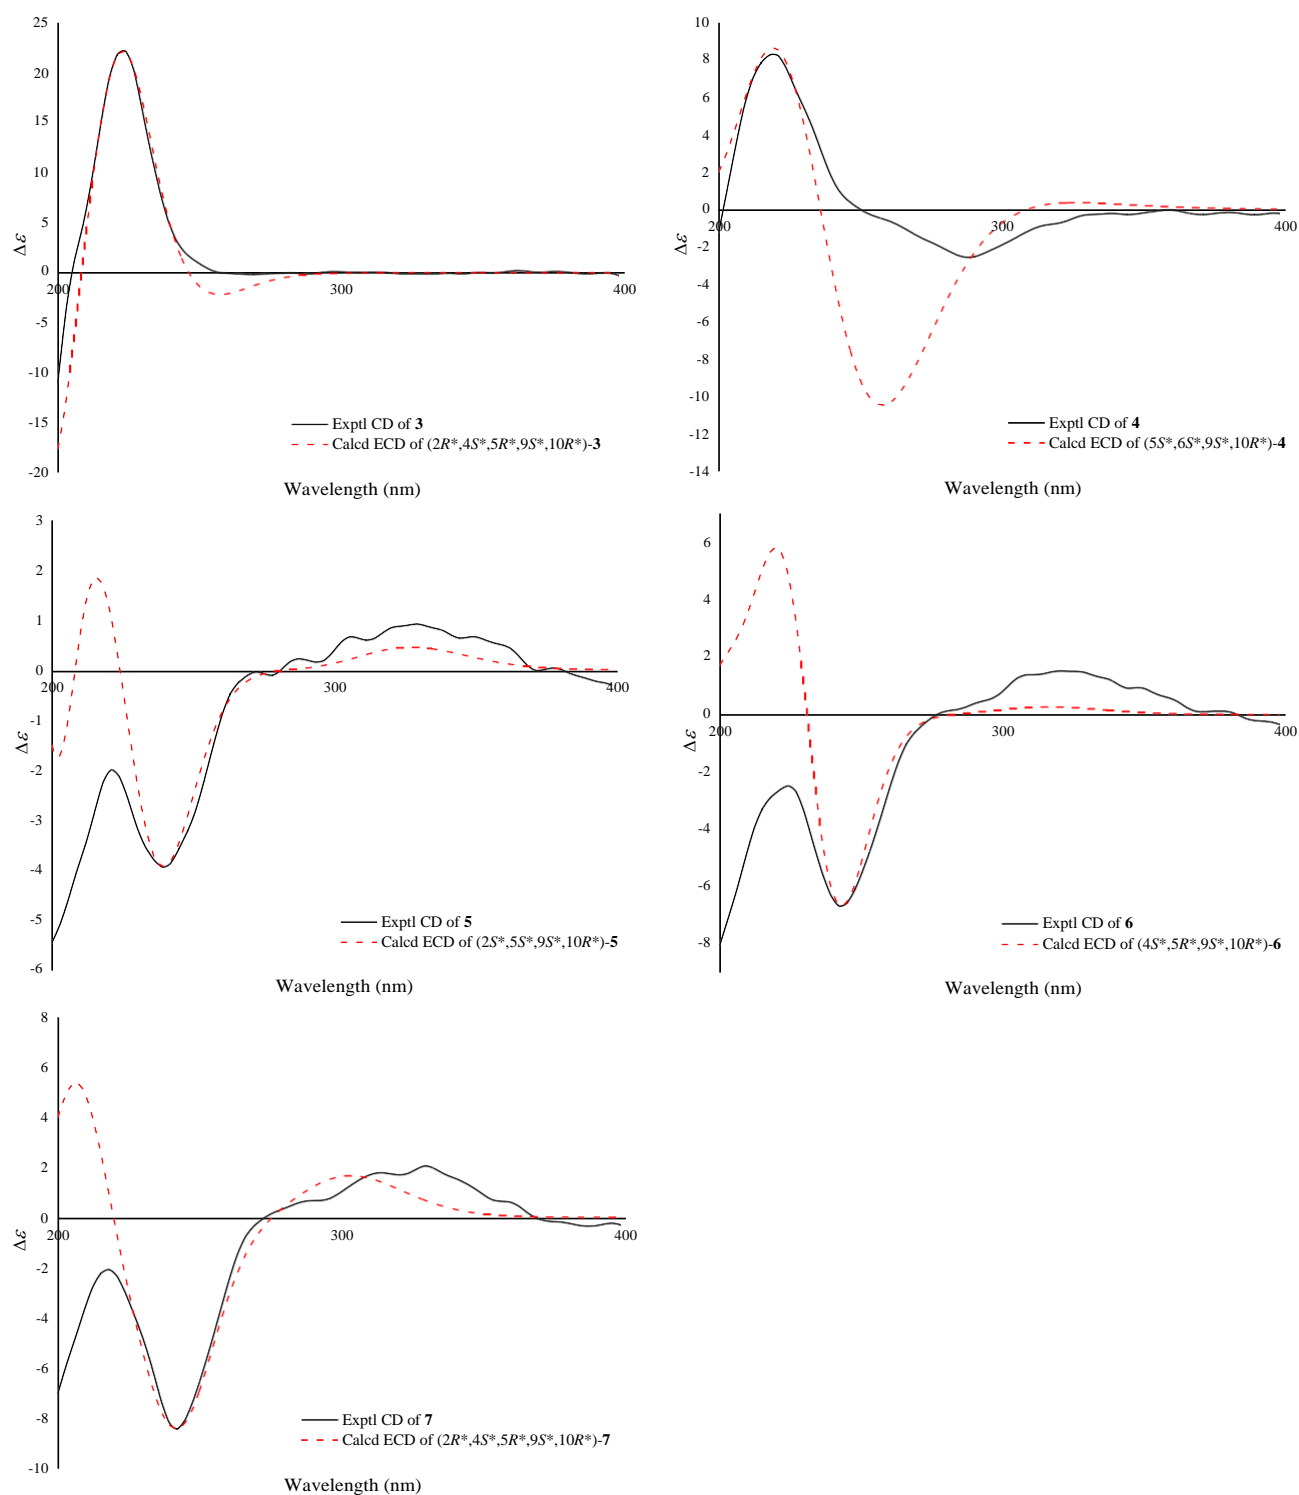

**Figure S11.** Comparison of calculated and experimental ECD spectra of **3**–**7** in methanol.

**Figure S12.**  $^1\text{H}$  NMR of **3** in  $\text{CD}_3\text{OD}$ .

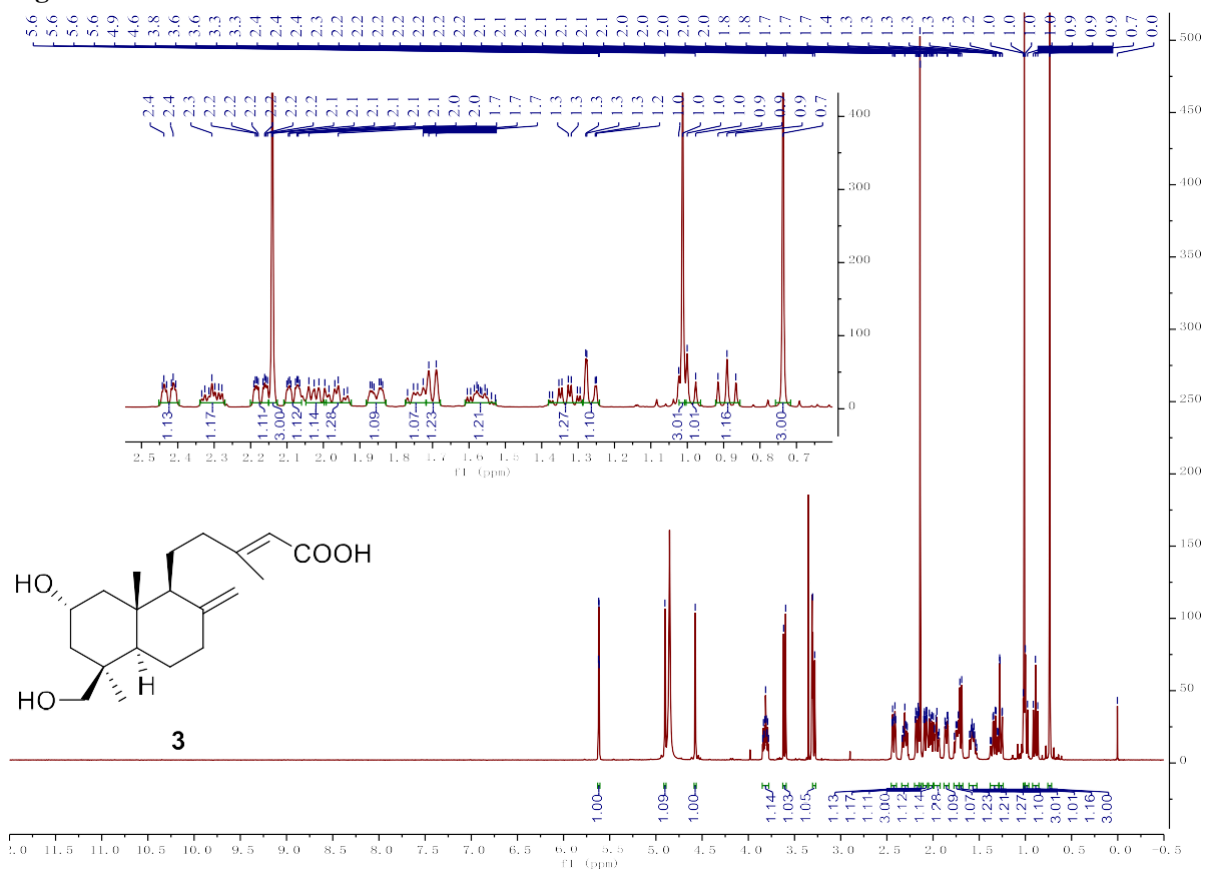

**Figure S13.**  $^{13}\text{C}$  NMR of **3** in  $\text{CD}_3\text{OD}$ .

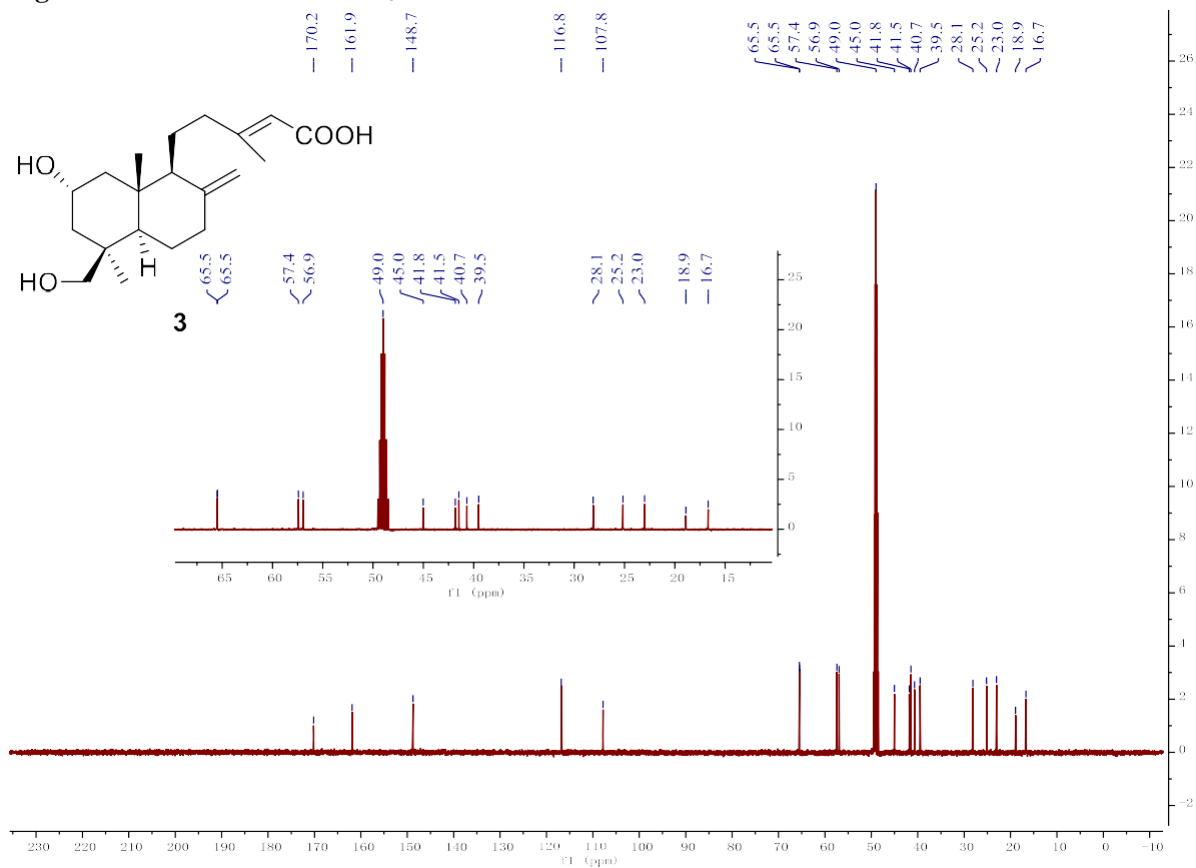

**Figure S14.** HSQC of **3** in CD<sub>3</sub>OD.

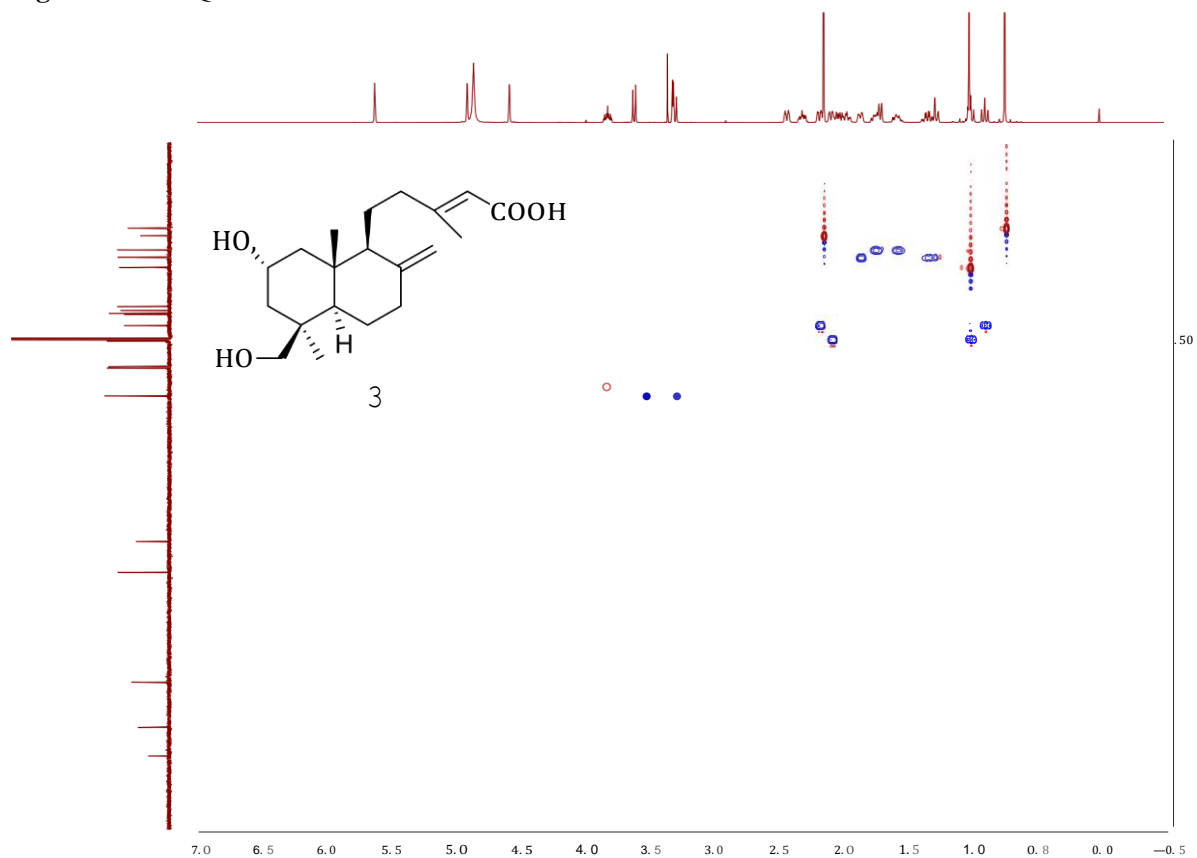

**Figure S15.** HMBC of **3** in CD<sub>3</sub>OD.

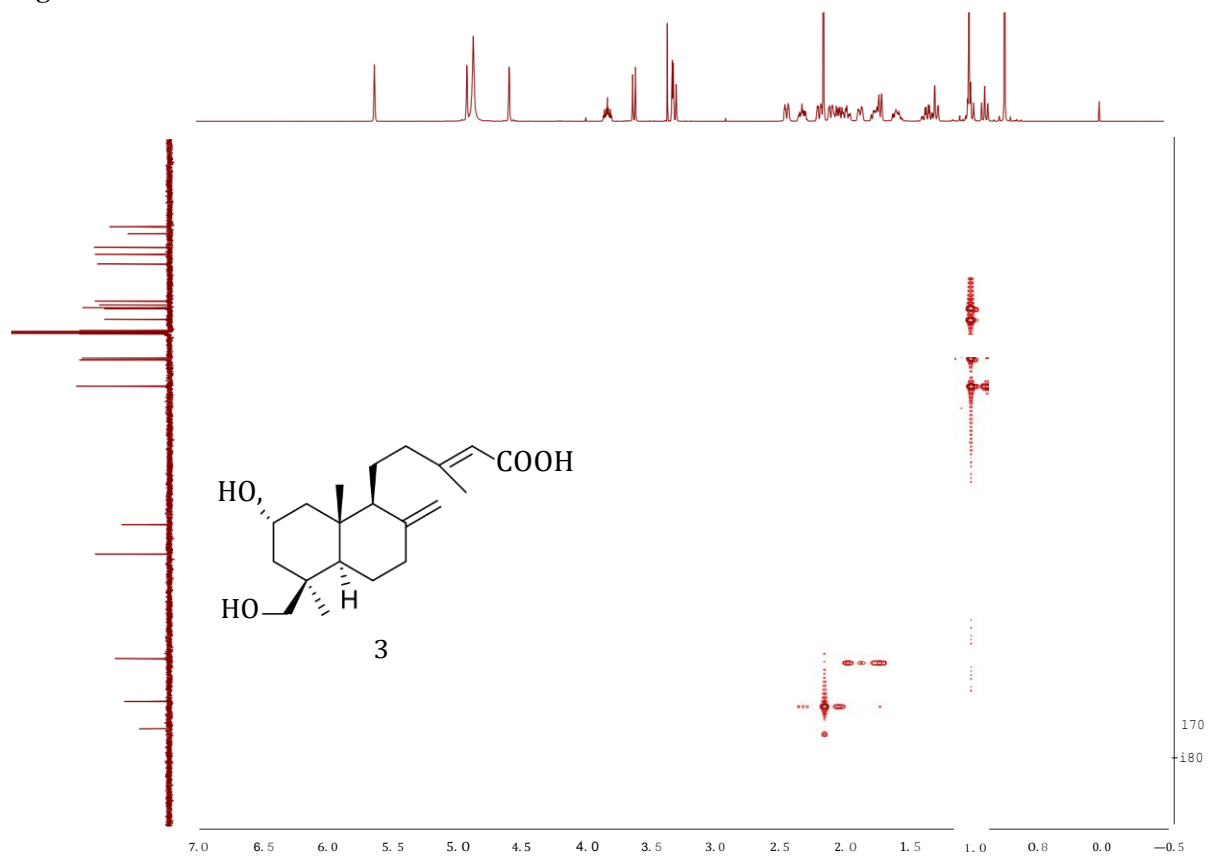

**Figure S16.**  $^1\text{H}$ - $^1\text{H}$  COSY of **3** in  $\text{CD}_3\text{OD}$ .

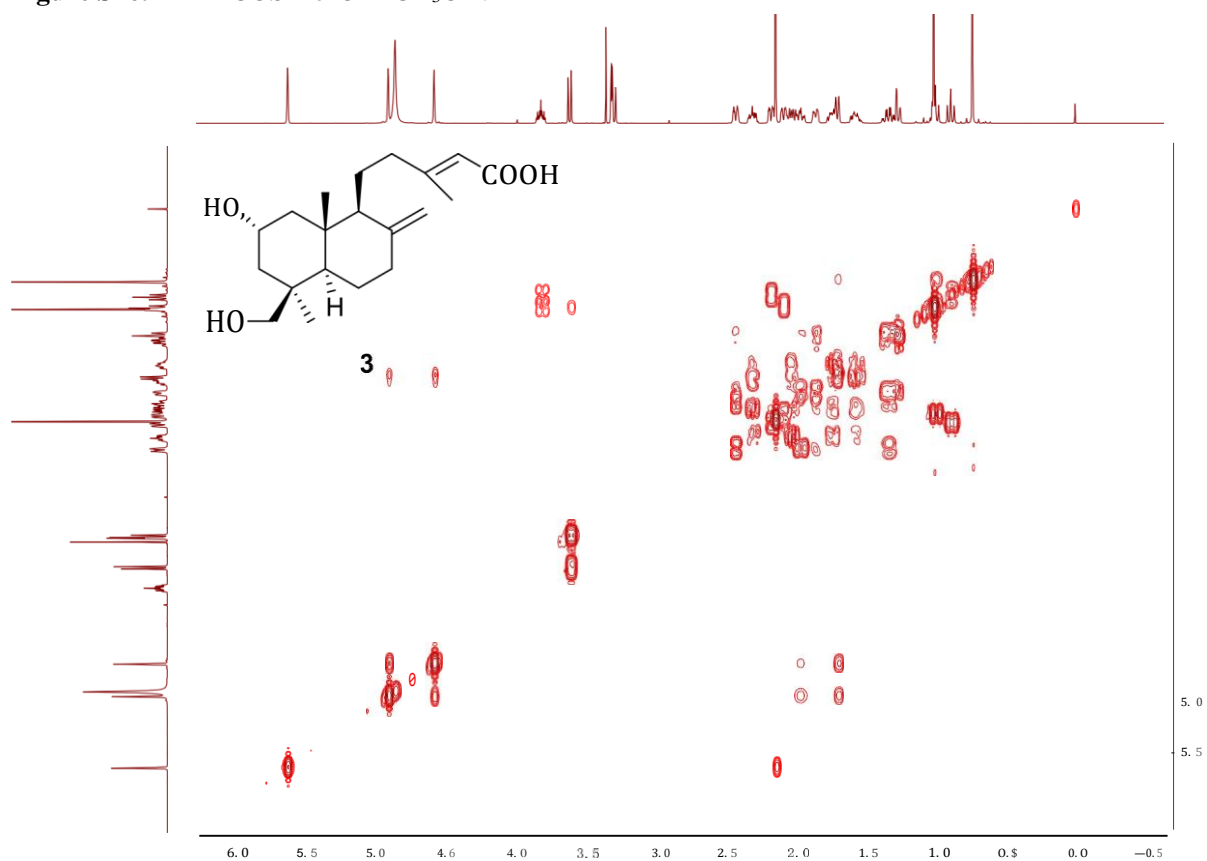

**Figure S17.** ROESY of **3** in  $\text{CD}_3\text{OD}$ .

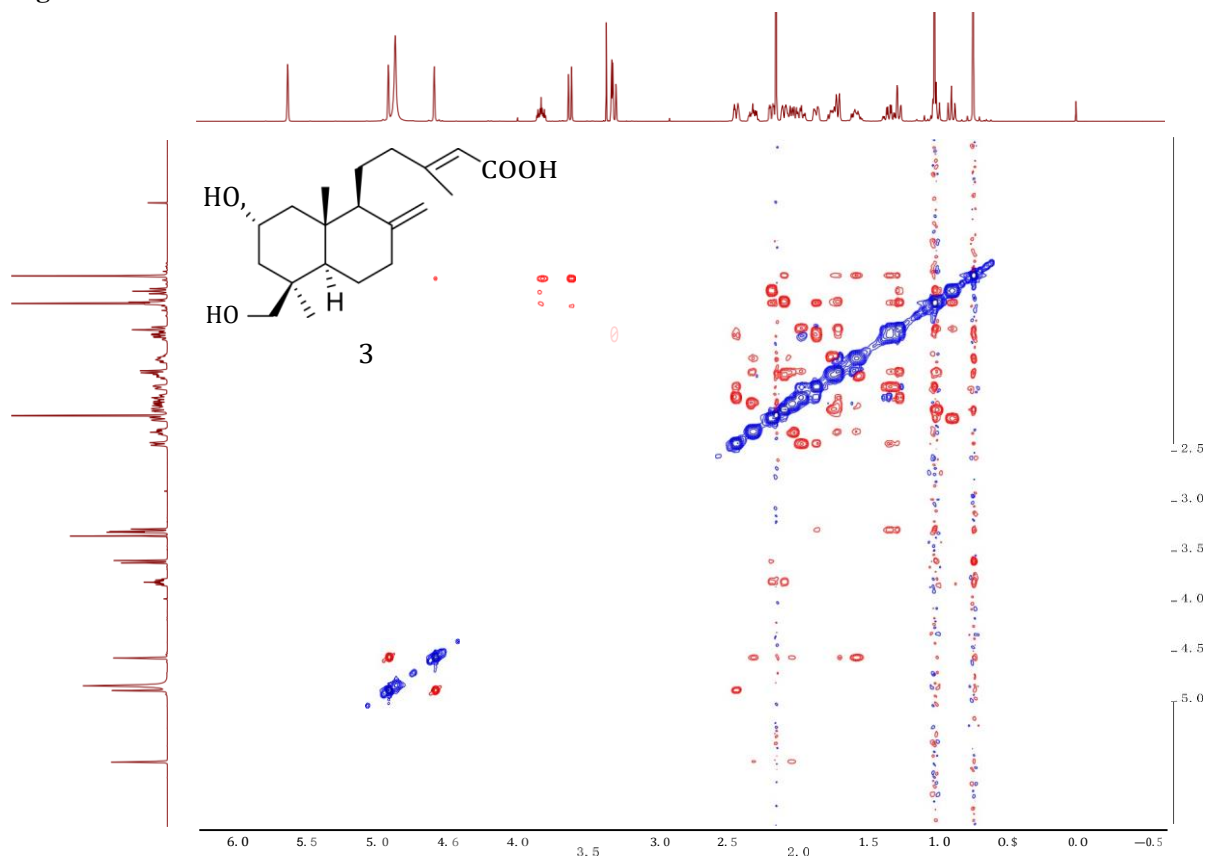

**Figure S18.** HRESIMS of **3**.

20230322-ZFL-1514-03-2-2\_230322163018 #81-82 RT: 0.67-0.68 AV: 2 NL: 1.36E7  
T: FTMS + p ESI Full ms[200.00-2000.00]

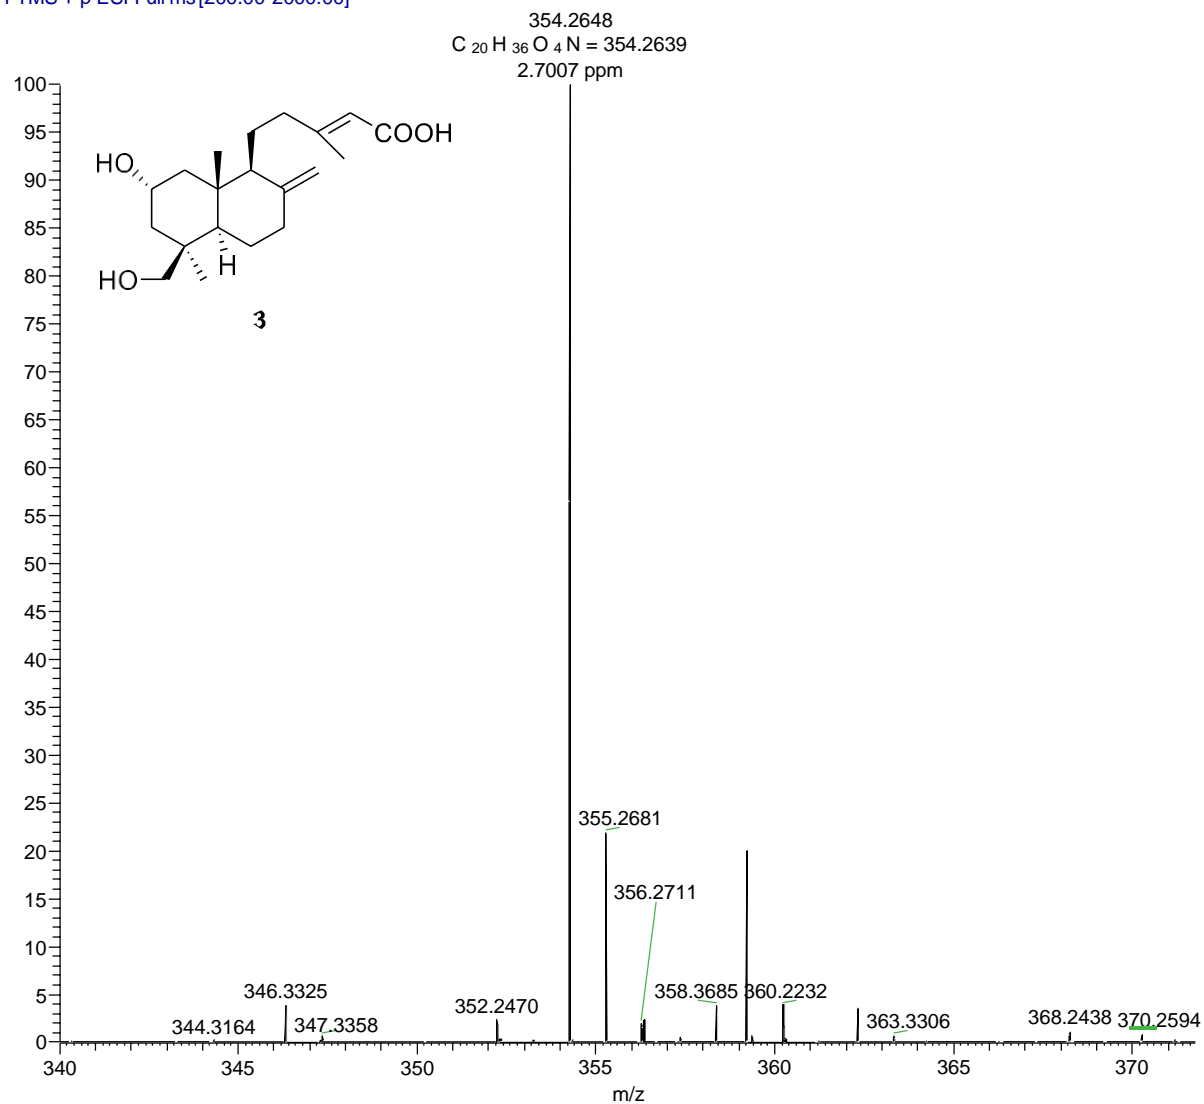

**Figure S19.** UV spectrum of **3**.

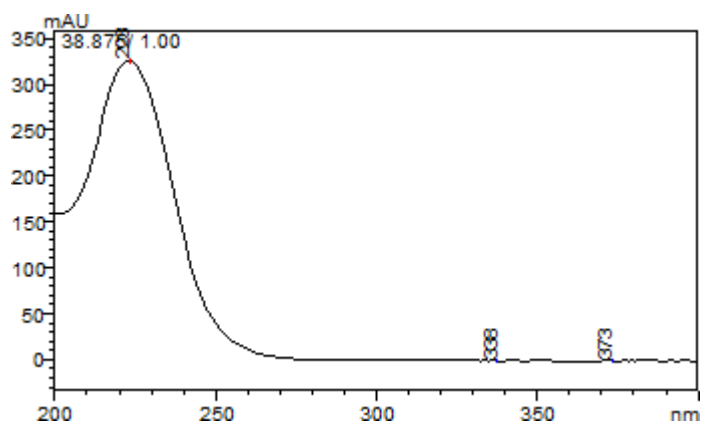

**Figure S20.**  $^1\text{H}$  NMR of **4** in  $\text{CD}_3\text{OD}$ .

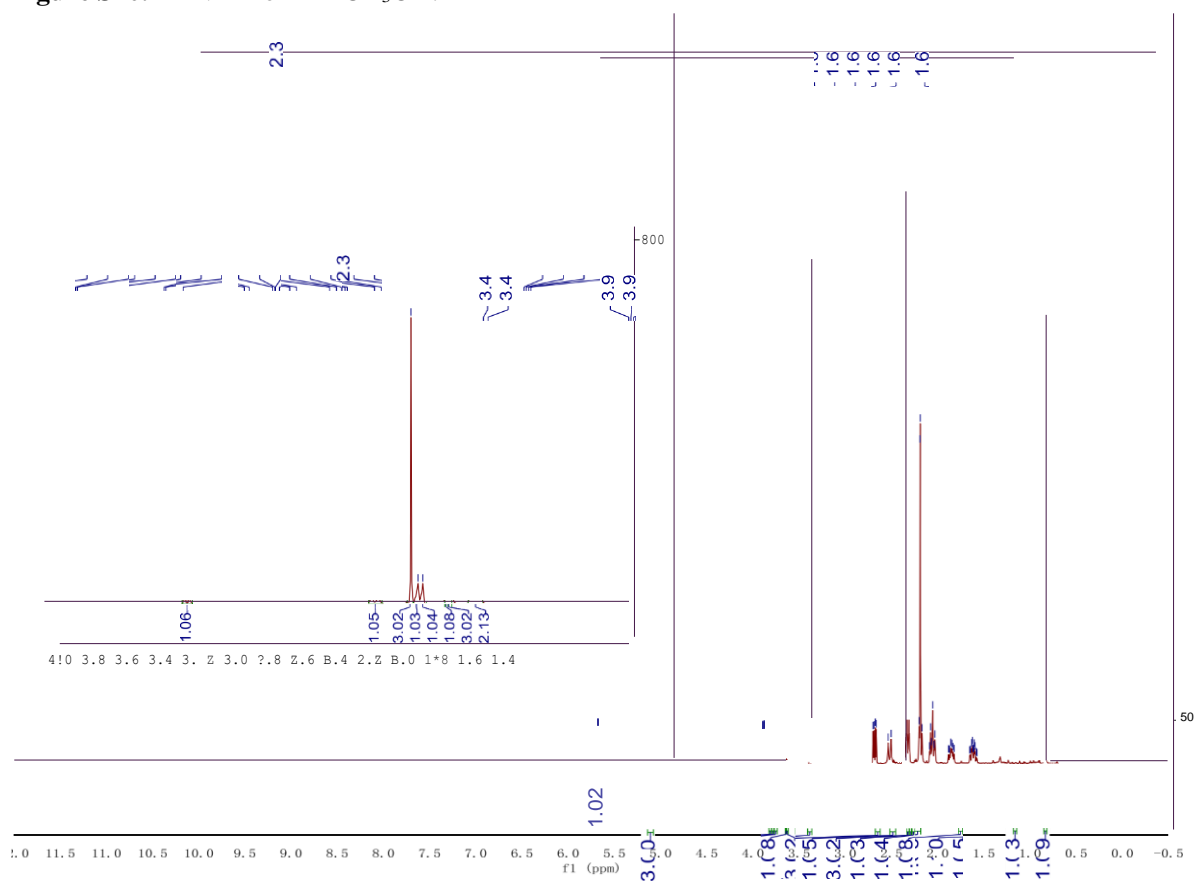

**Figure S21.**  $^{13}\text{C}$  NMR and DEPT of **4** in  $\text{CD}_3\text{OD}$ .

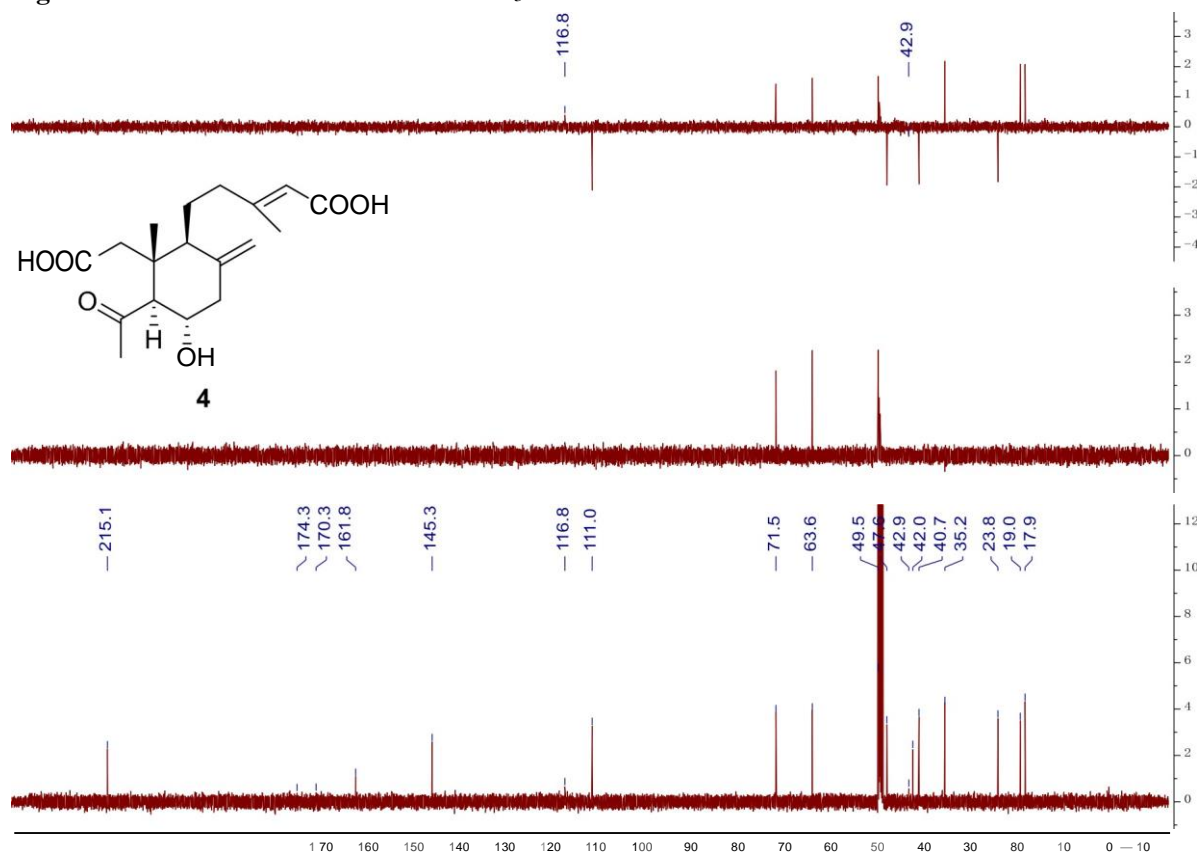



**Figure S22.** HSQC of **4** in CD<sub>3</sub>OD.

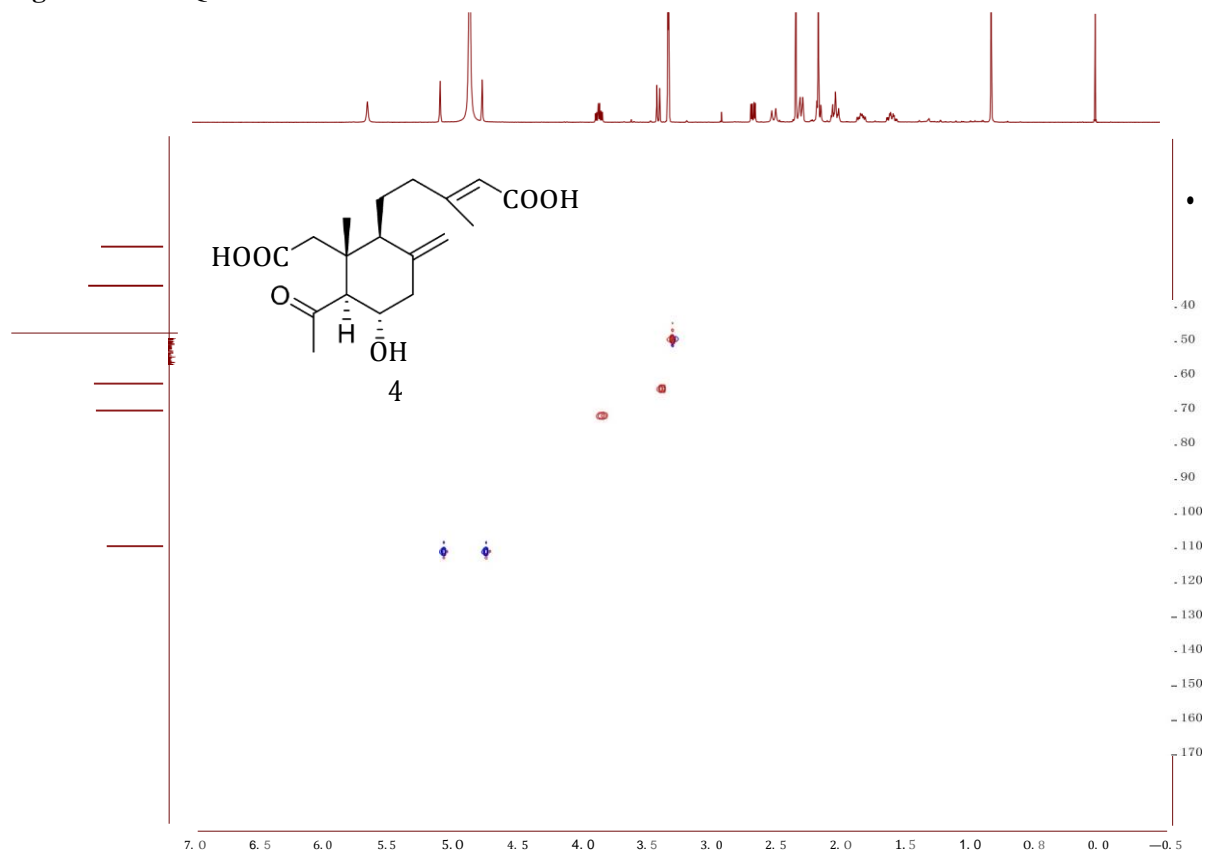

**Figure S23.** HMBC of **4** in CD<sub>3</sub>OD.

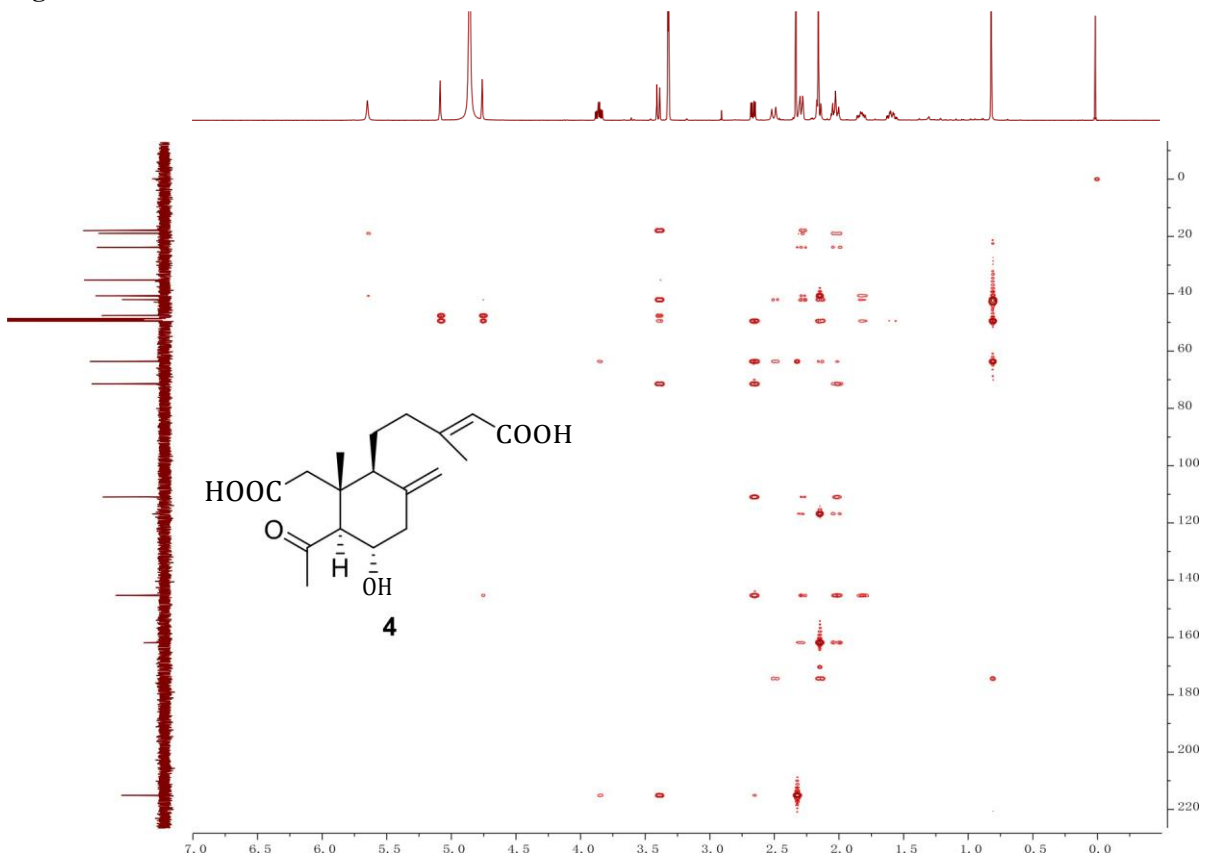

**Figure S24.**  $^1\text{H}$ - $^1\text{H}$  COSY of **4** in  $\text{CD}_3\text{OD}$ .

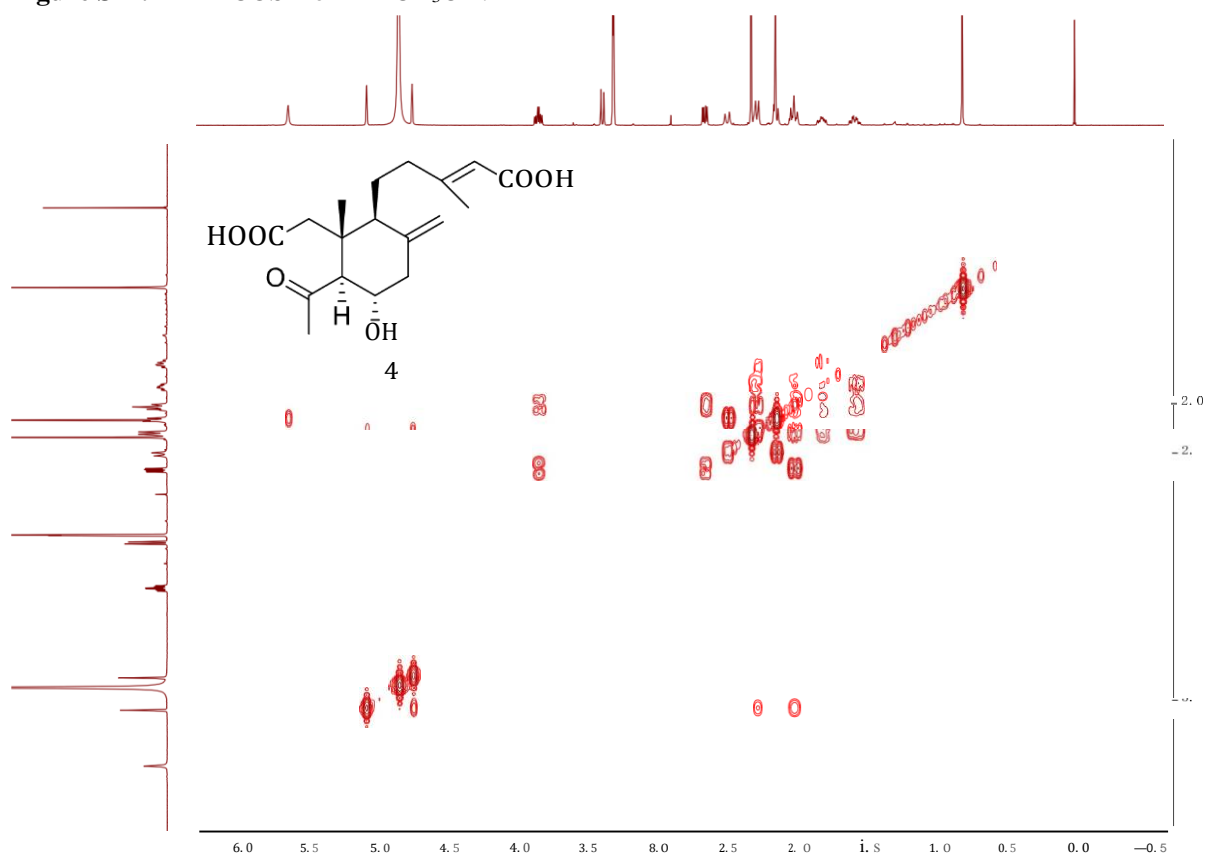

**Figure S25.** ROESY of **4** in  $\text{CD}_3\text{OD}$ .

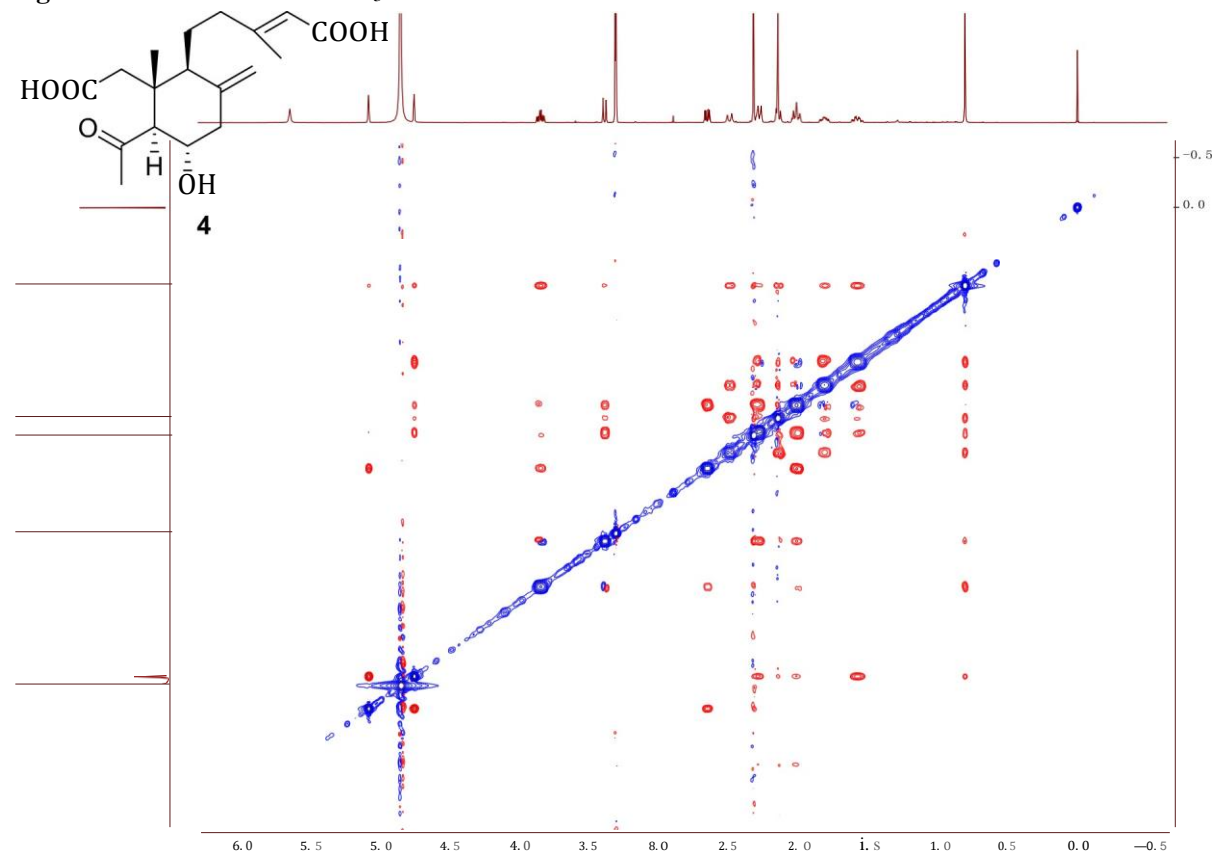

**Figure S26.** HRESIMS of **4**.

ZFL-151403-9 #19-21 RT: 0.16-0.18 AV: 3 SB: 8 0.01-0.07 NL: 6.93E6  
T: FTMS + p ESI Full ms[180.00-1000.00]

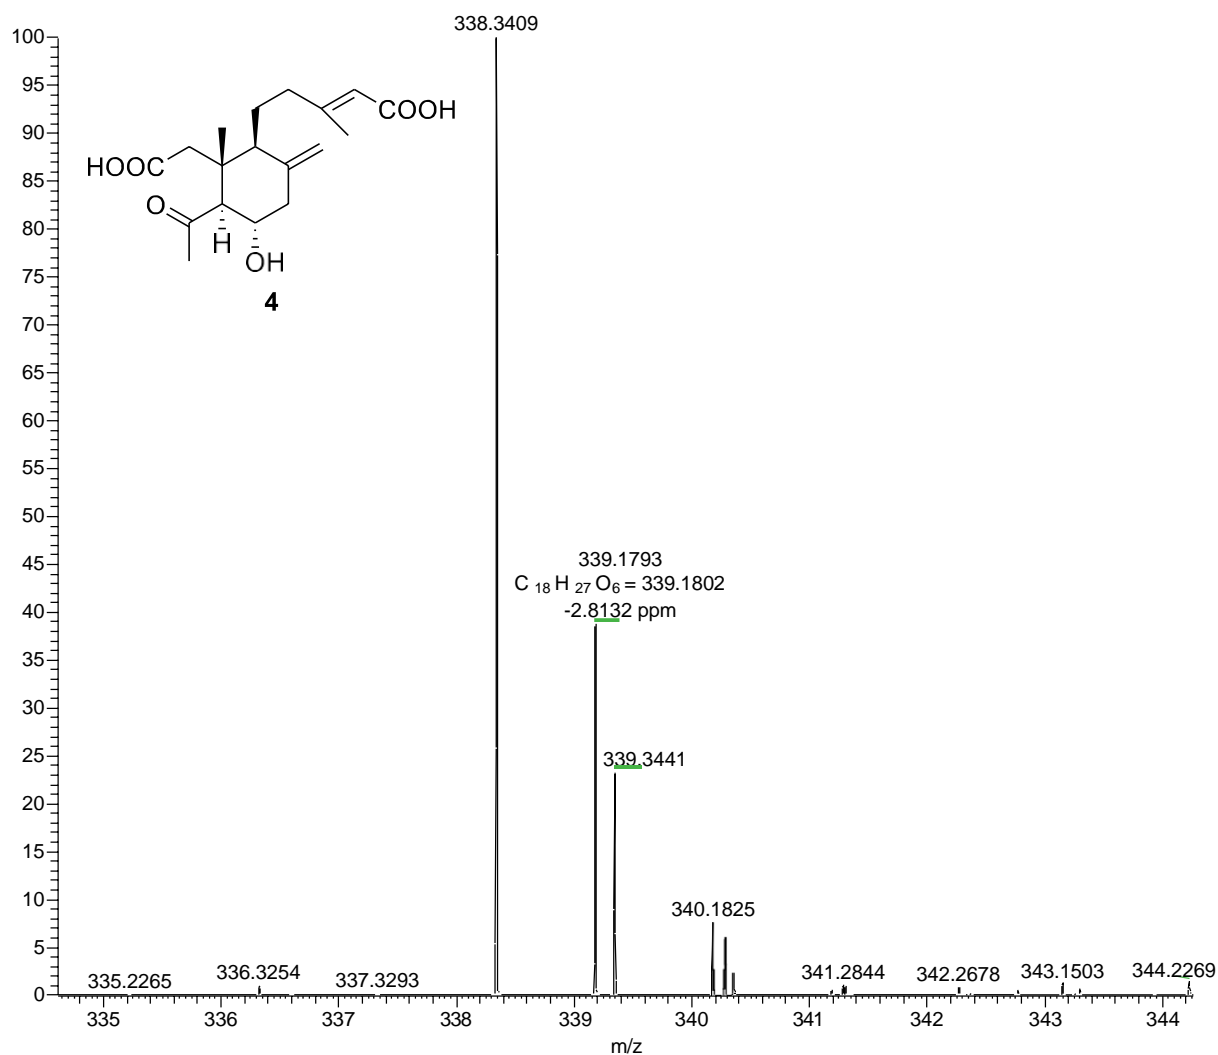

**Figure S27.** UV spectrum of **4**.

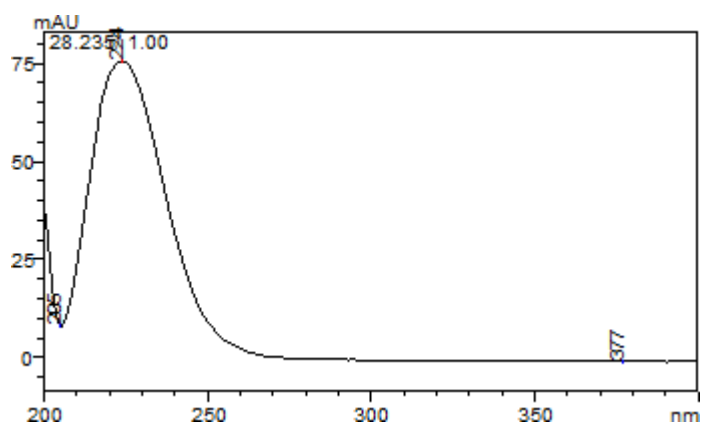

**Figure S28.**  $^1\text{H}$  NMR of **5** in  $\text{CD}_3\text{OD}$ .

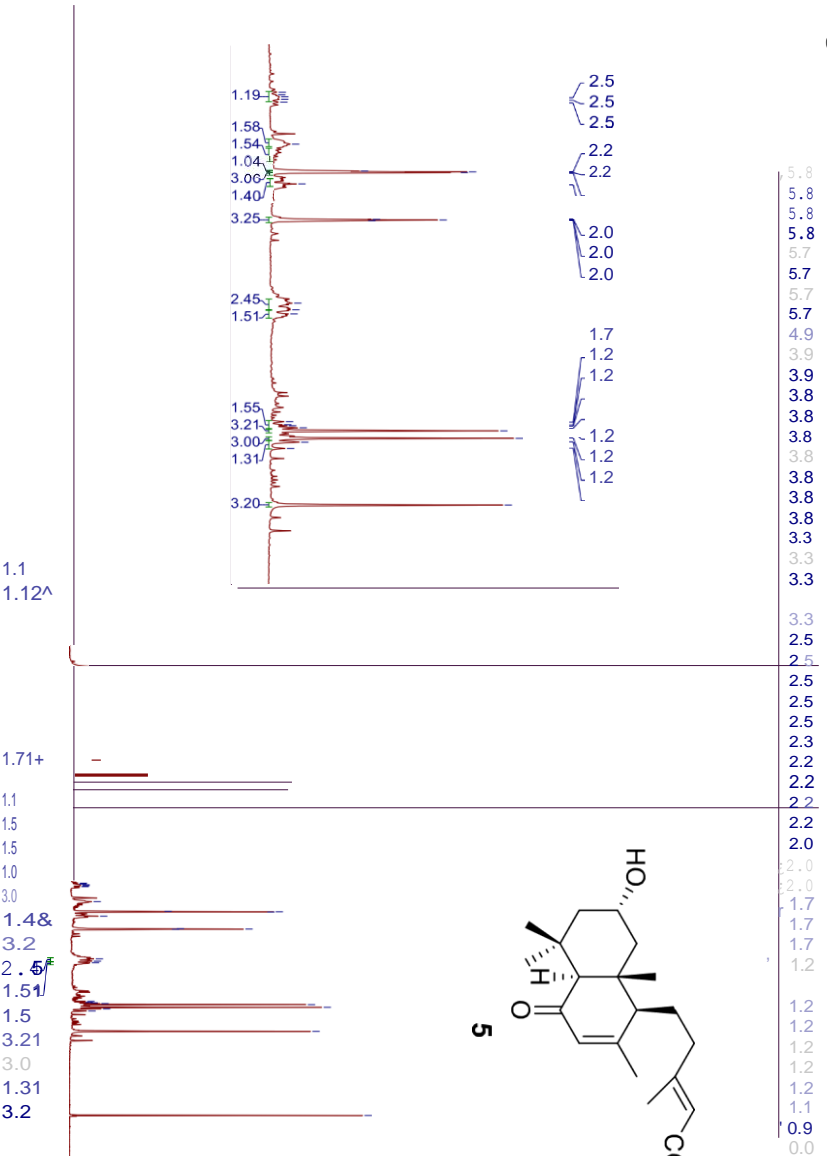

**Figure S29.**  $^{13}\text{C}$  NMR of **5** in  $\text{CD}_3\text{OD}$ .

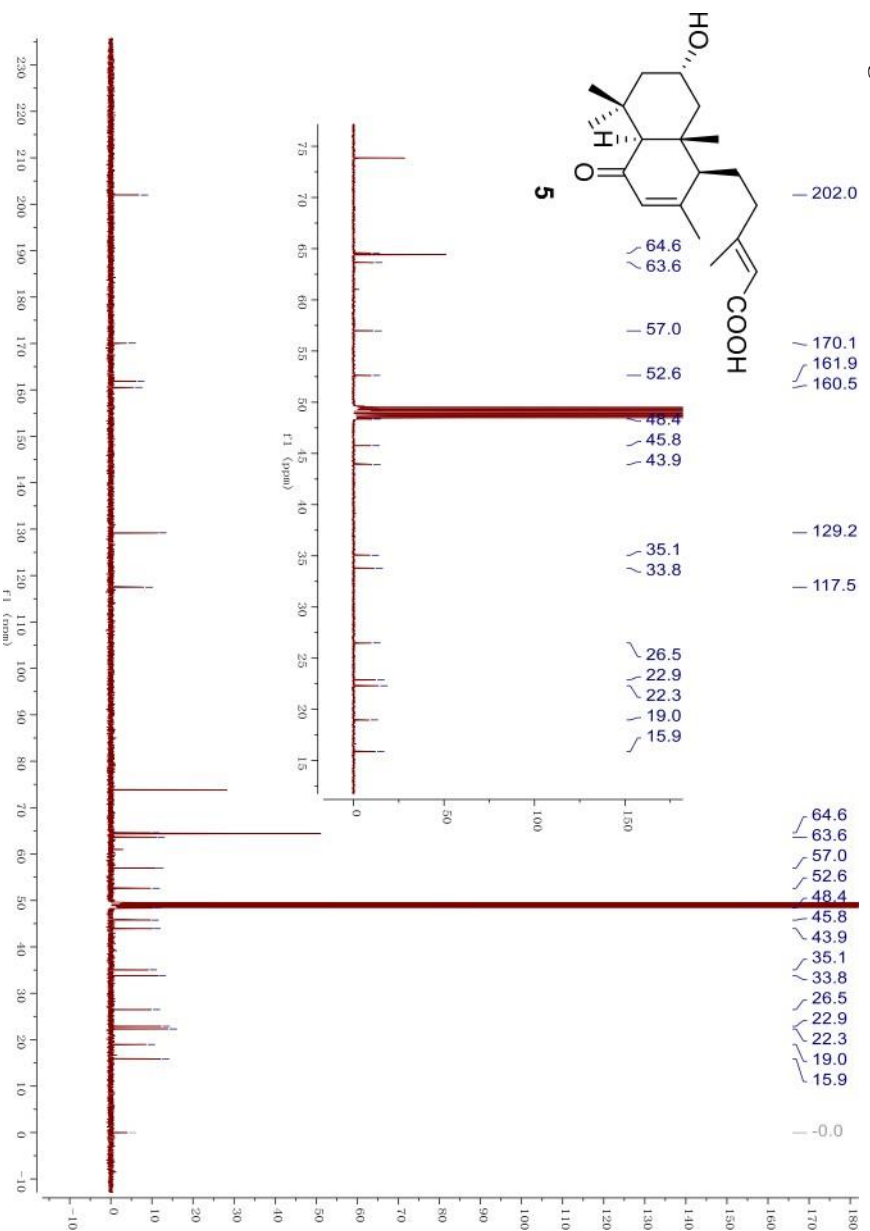

**Figure S30.** HSQC of **5** in CD<sub>3</sub>OD.

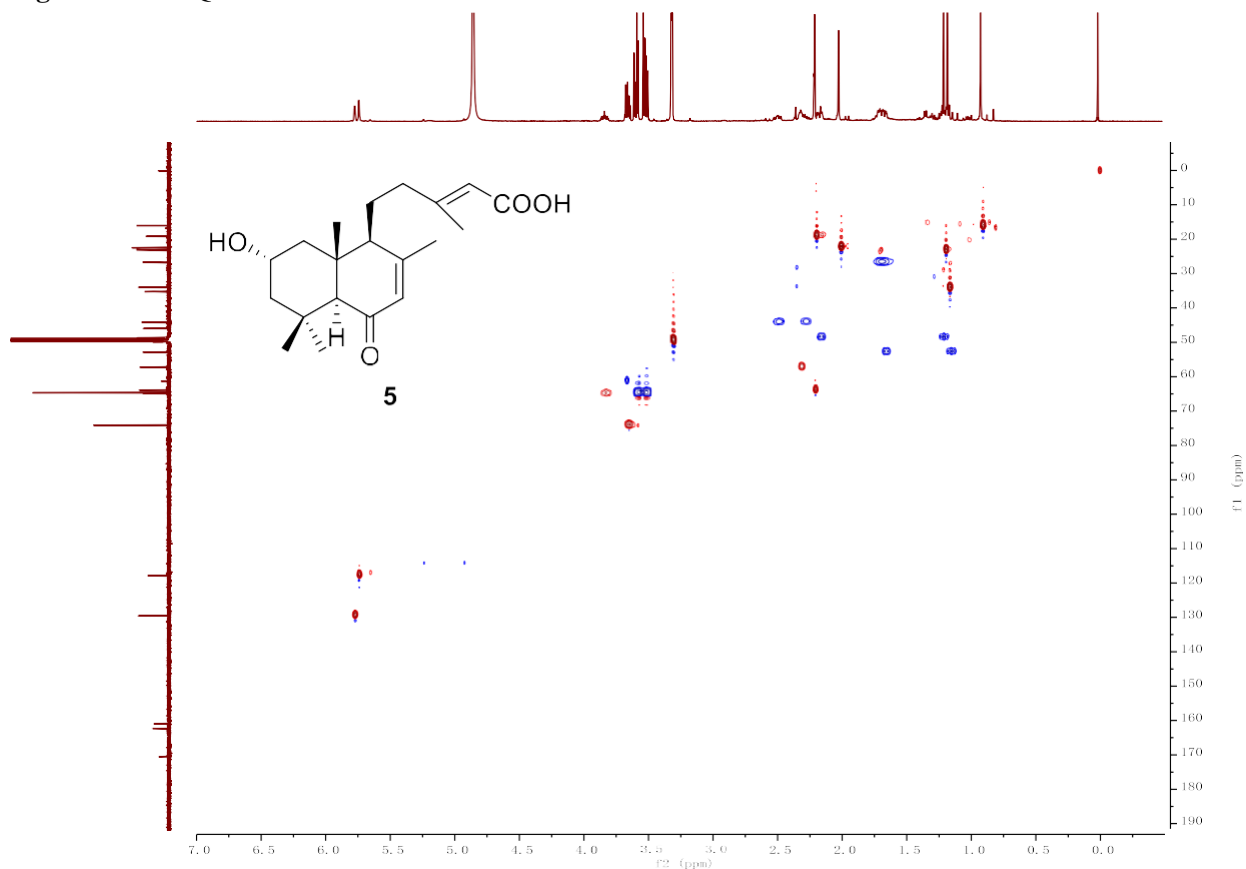

**Figure S31.** HMBC of **5** in CD<sub>3</sub>OD.

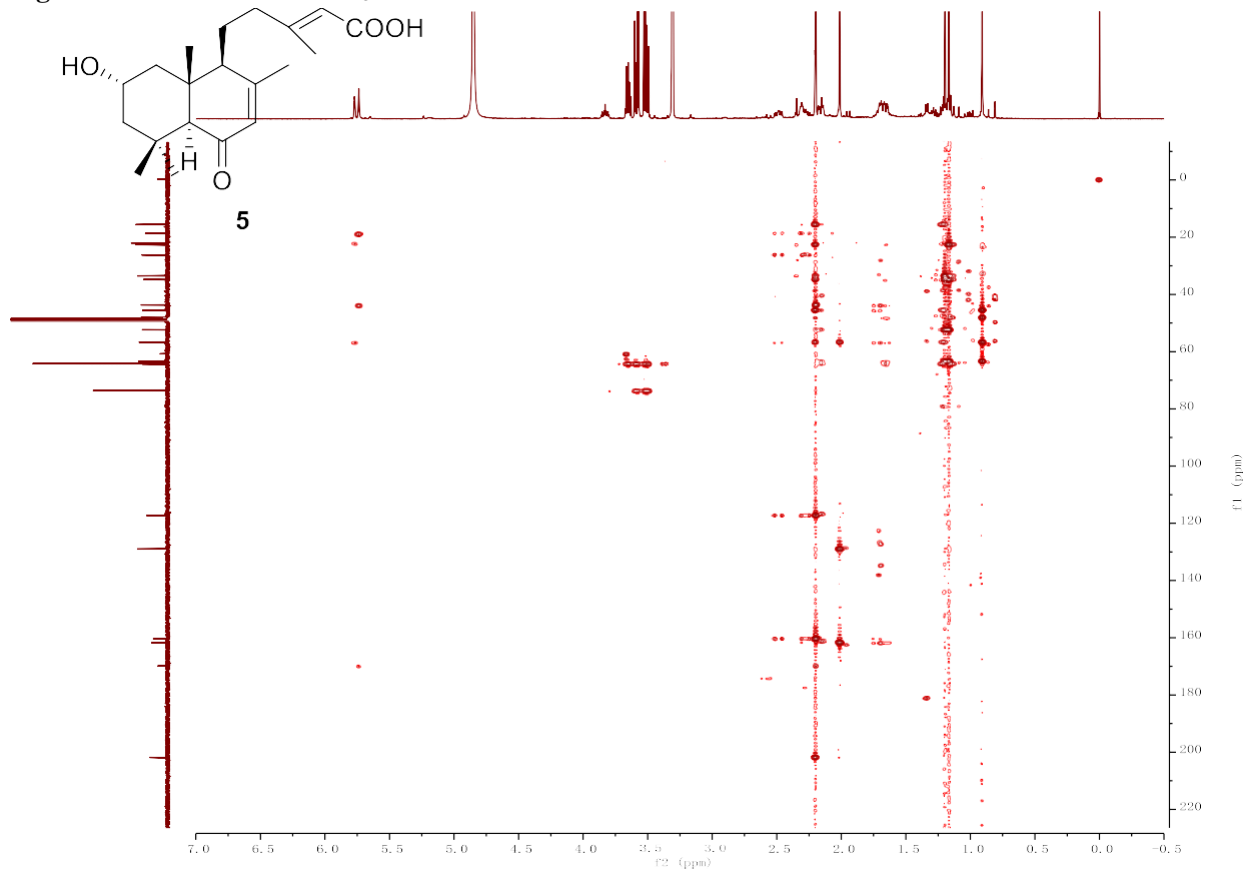

**Figure S32.**  $^1\text{H}$ - $^1\text{H}$  COSY of **5** in  $\text{CD}_3\text{OD}$ .

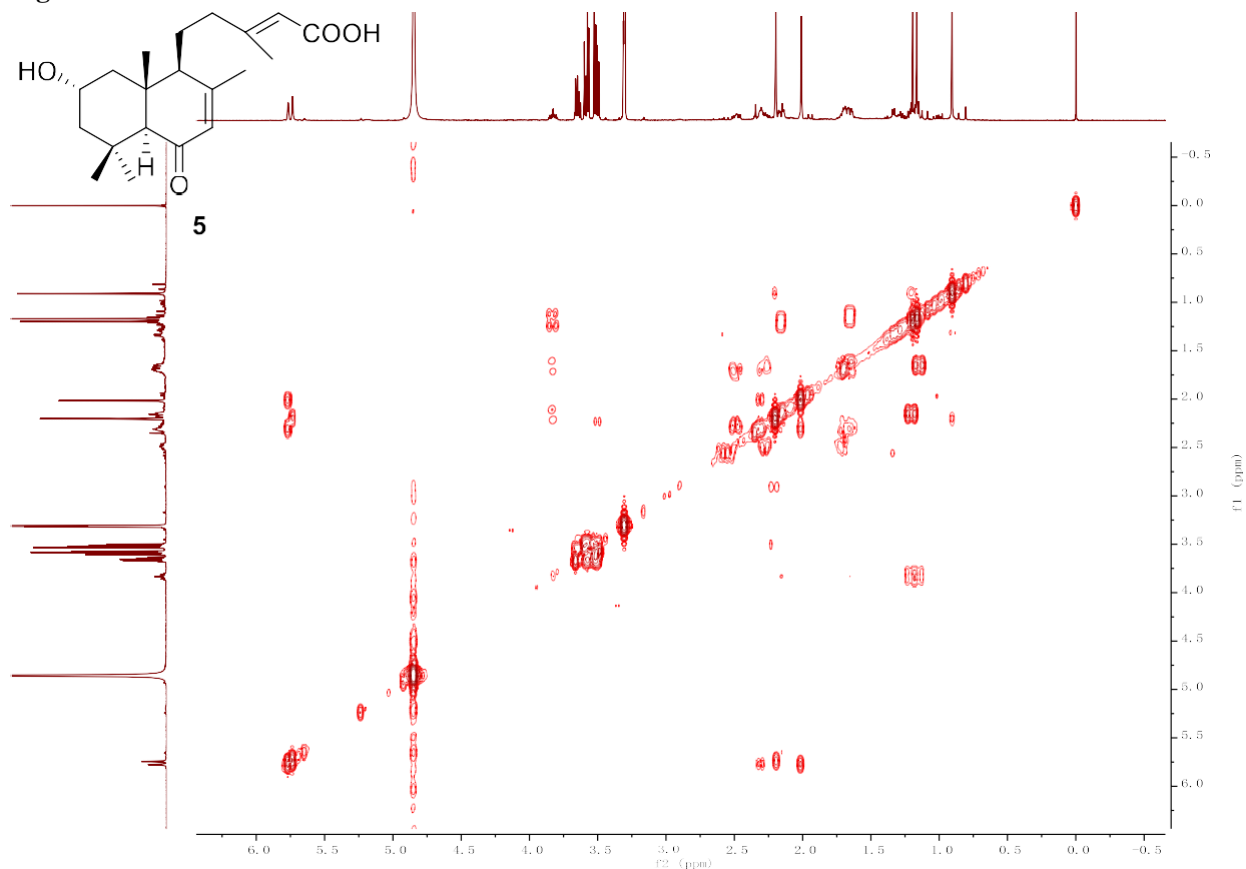

**Figure S33.** ROESY of **5** in  $\text{CD}_3\text{OD}$ .

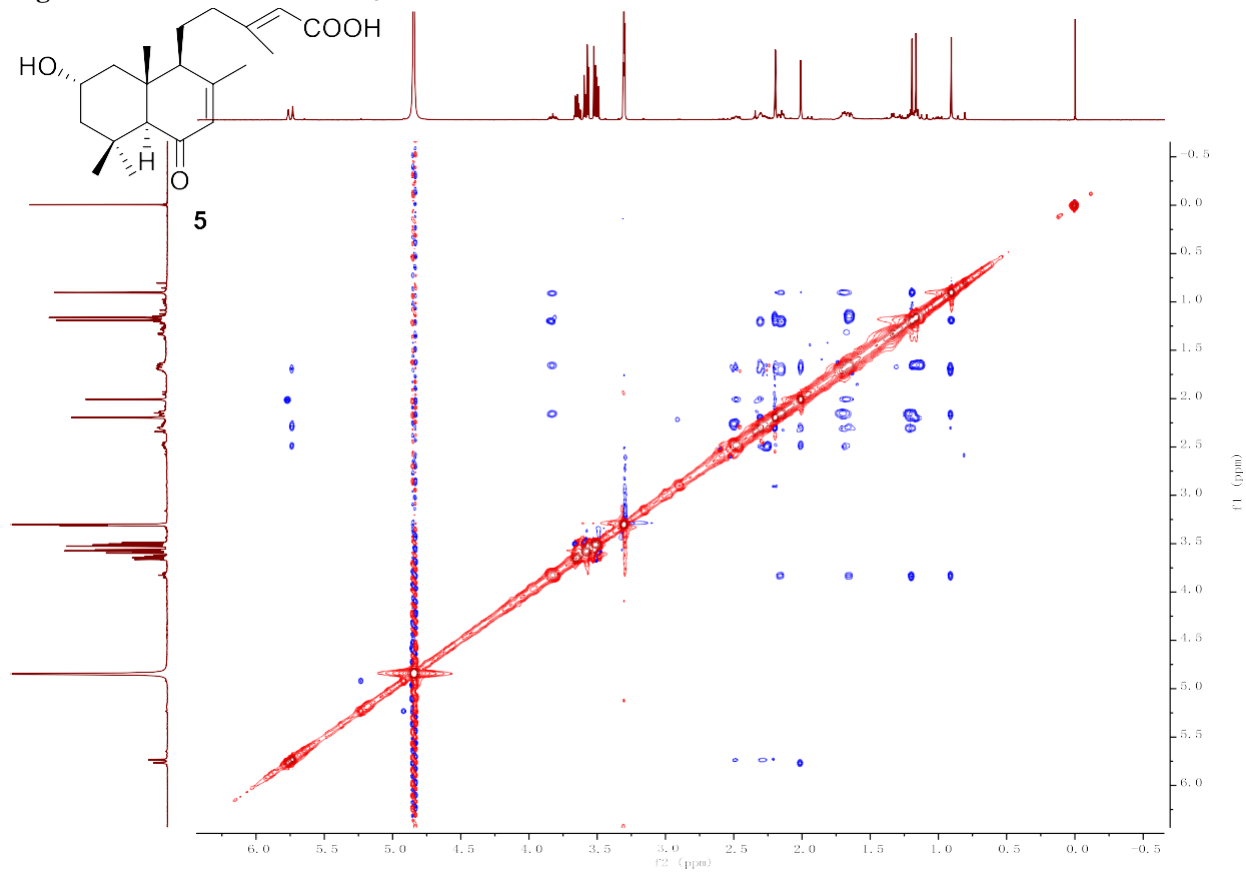

**Figure S34.** HRESIMS of **5**.

ZFL-151403-4 #15-18 RT: 0.13-0.15 AV: 4 NL: 7.90E6

T: FTMS + p ESI Full ms[180.00-1000.00]

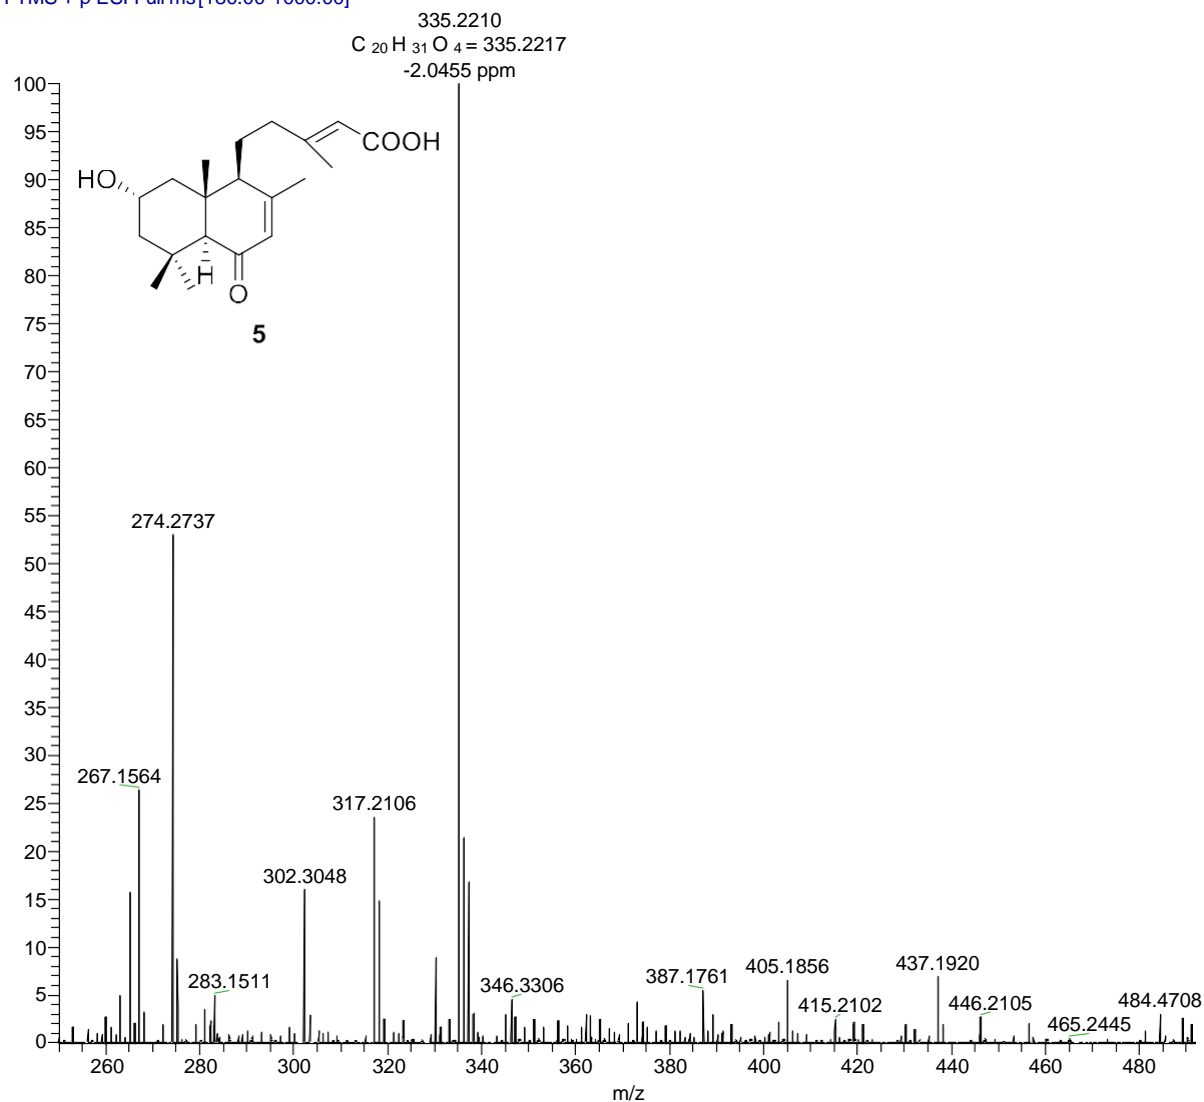

**Figure S35.** UV spectrum of **5**.

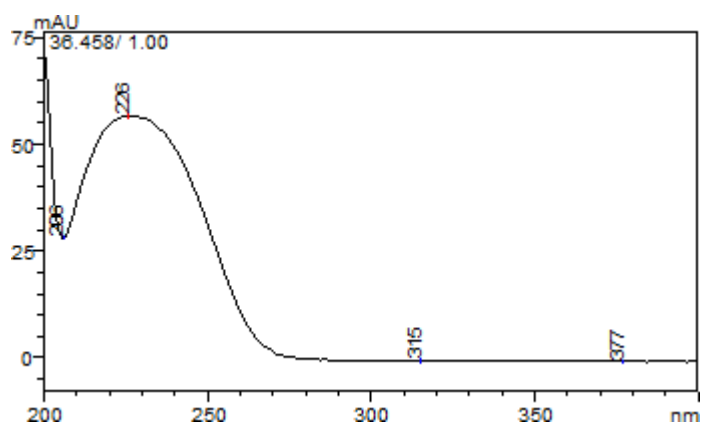

<sup>1</sup>H NMR spectrum of compound 10a in CDCl<sub>3</sub>. The spectrum shows peaks from 0.6 to 11.6 ppm. Key features include a broad peak at 11.5 ppm (NH), a multiplet at 7.5 ppm (aromatic), a multiplet at 6.5 ppm (aromatic), a multiplet at 3.5 ppm (CH<sub>2</sub>), a multiplet at 2.5 ppm (CH<sub>2</sub>), a multiplet at 1.8 ppm (CH<sub>2</sub>), a multiplet at 1.0 ppm (CH<sub>2</sub>), a multiplet at 0.8 ppm (CH<sub>2</sub>), and a multiplet at 0.6 ppm (CH<sub>2</sub>). Integration values are shown below the peaks: 1.48, 1.04, 1.47, 3.10, 3.11, 1.27, 1.38, 1.70, 1.78, 1.08, 1.03, 1.36, 3.04, 1.46, 3.00, 1.8, 1.0, 3.0, 3.1, 1.4.

Chemical structure of compound **6** is shown. The structure is a pentacyclic molecule with a ketone group, a hydroxyl group, and a side chain containing a double bond and a carboxylic acid group.

The  $^{13}\text{C}$  NMR spectrum (f1 (ppm)) shows the following chemical shifts (ppm):

- 16.5
- 17.2
- 17.8
- 18.5
- 19.1
- 20.5
- 21.2
- 22.8
- 23.5
- 24.2
- 25.8
- 26.5
- 27.3
- 39.6
- 39.0
- 37.2
- 43.9
- 44.5
- 57.2
- 63.7



**Figure S38.** HSQC of **6** in CD<sub>3</sub>OD.

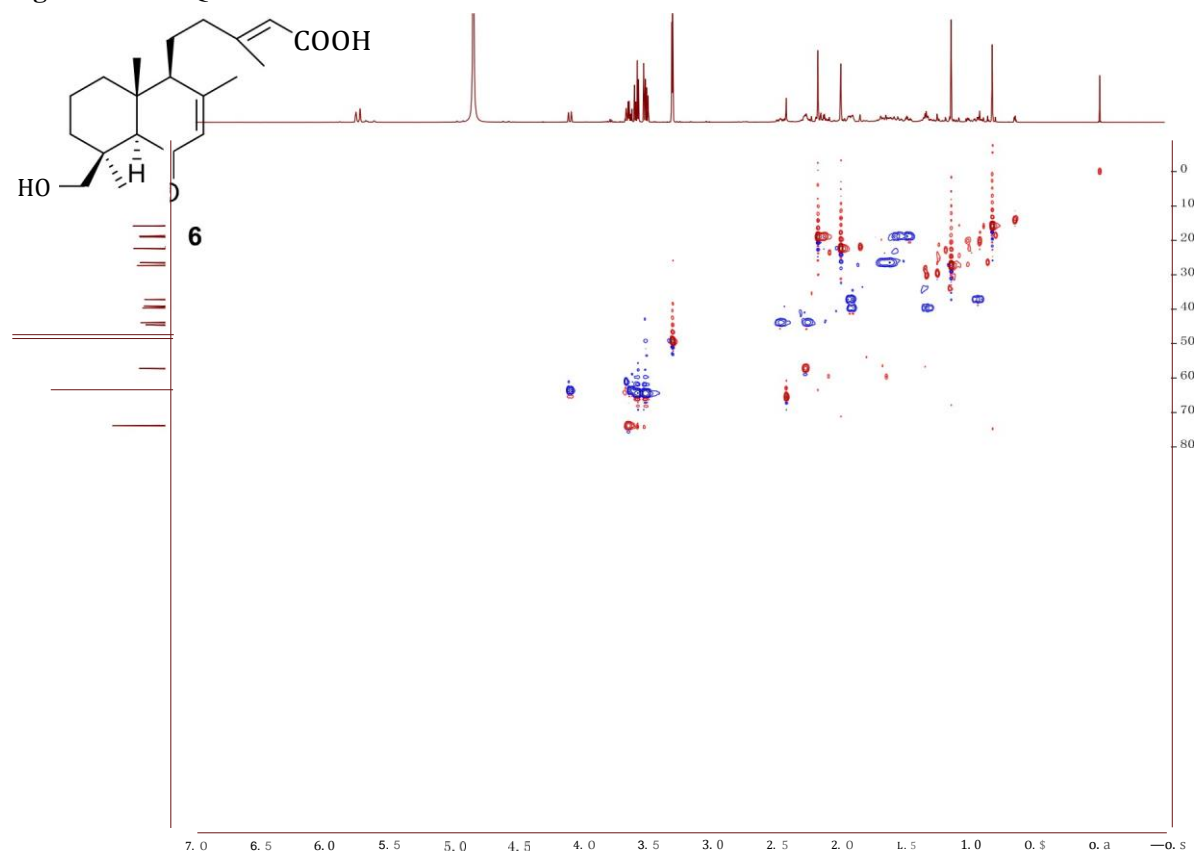

**Figure S39.** HMBC of **6** in CD<sub>3</sub>OD.

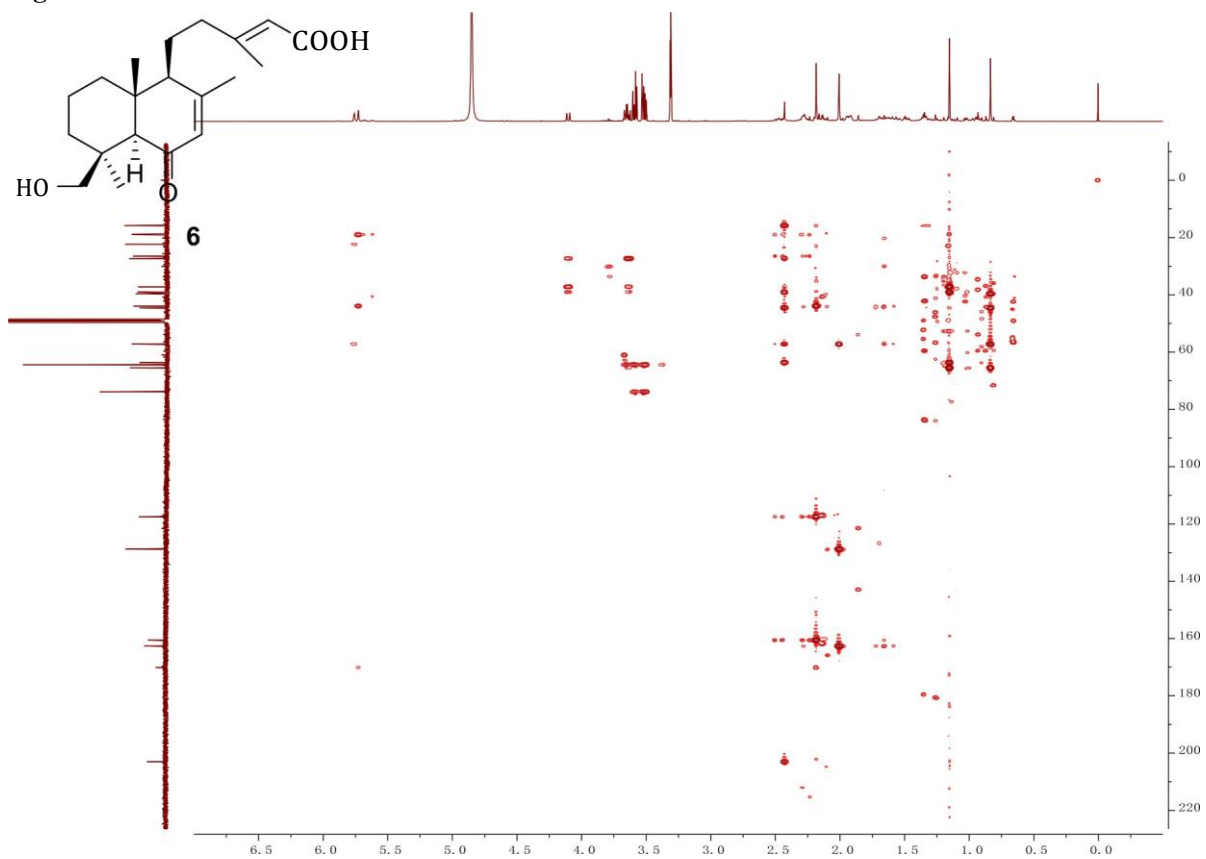

**Figure S40.**  $^1\text{H}$ - $^1\text{H}$  COSY of **6** in  $\text{CD}_3\text{OD}$ .

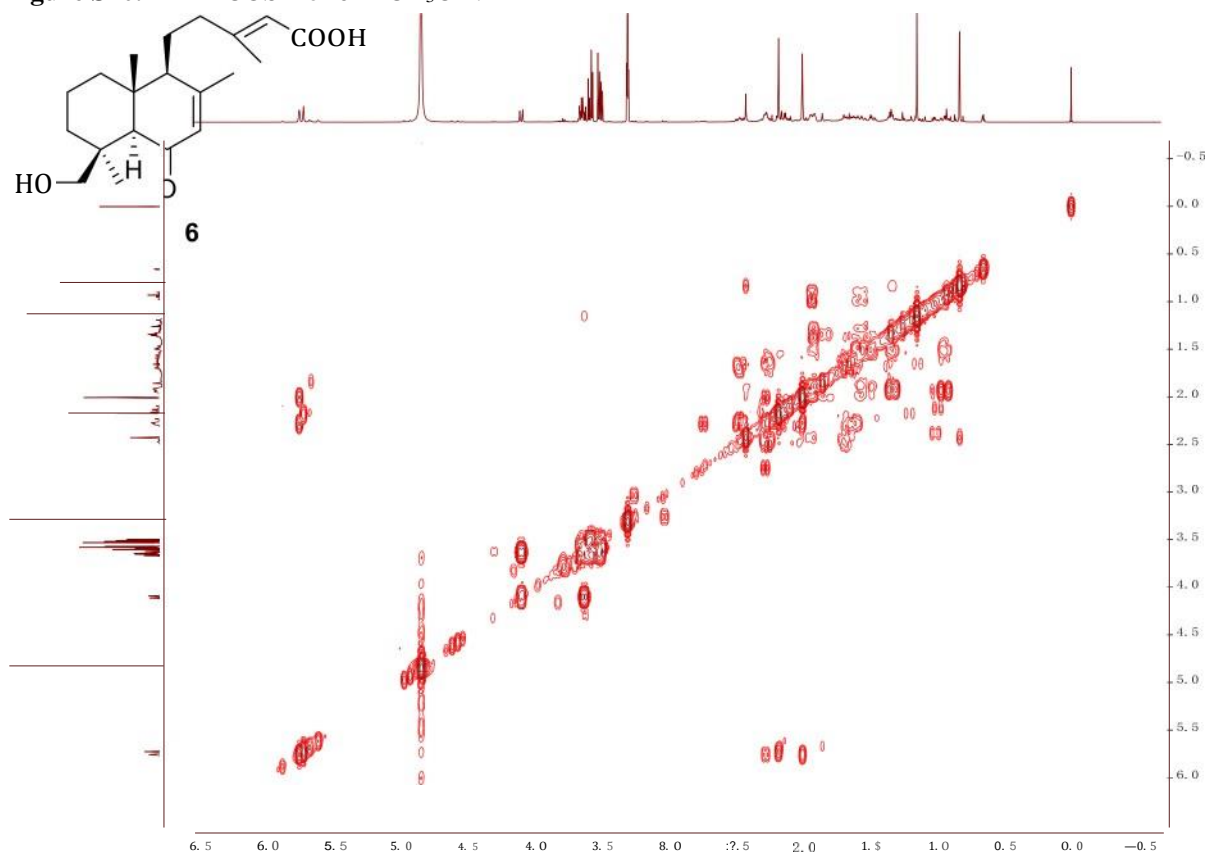

**Figure S41.** ROESY of **6** in  $\text{CD}_3\text{OD}$ .

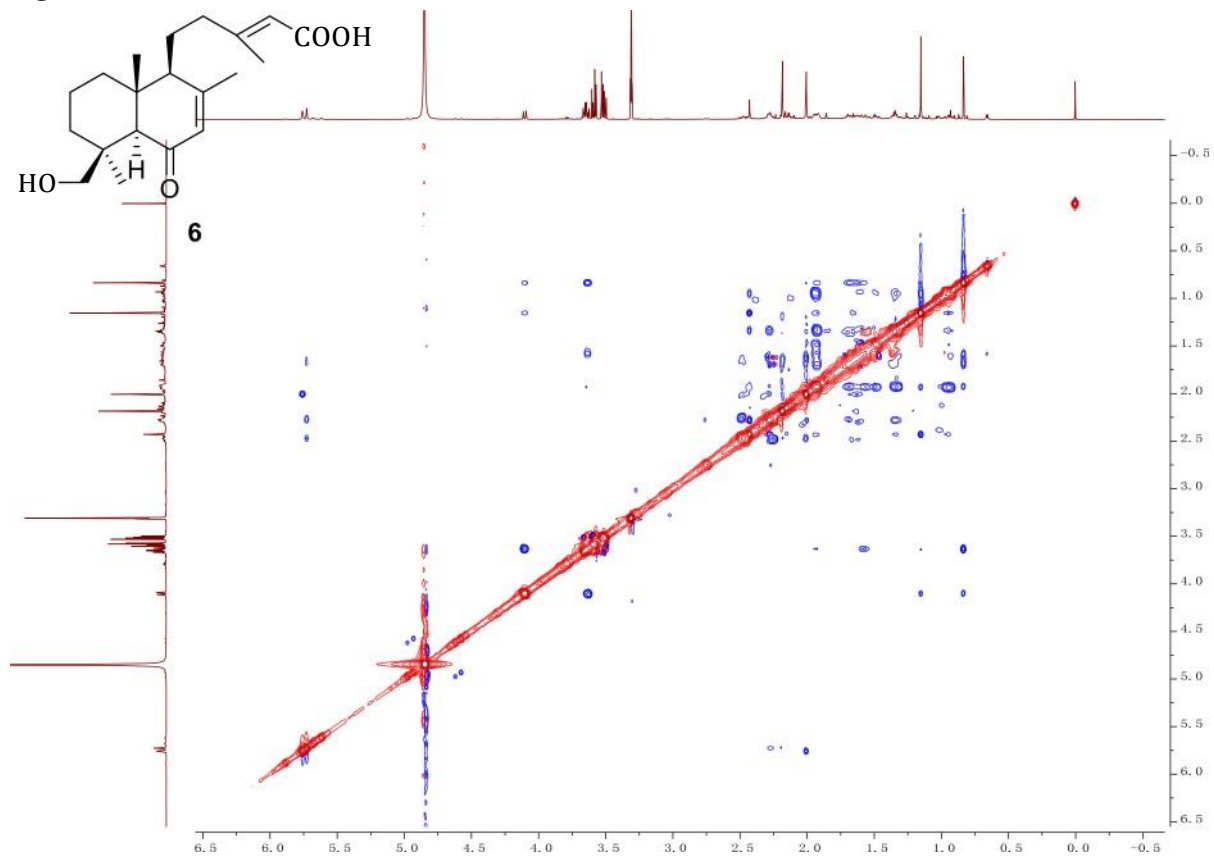

**Figure S42.** HRESIMS of **6**.

ZFL-151403-5 #16-17 RT: 0.14-0.15 AV: 2 NL: 7.61E7

T: FTMS + p ESI Full ms[180.00-1000.00]

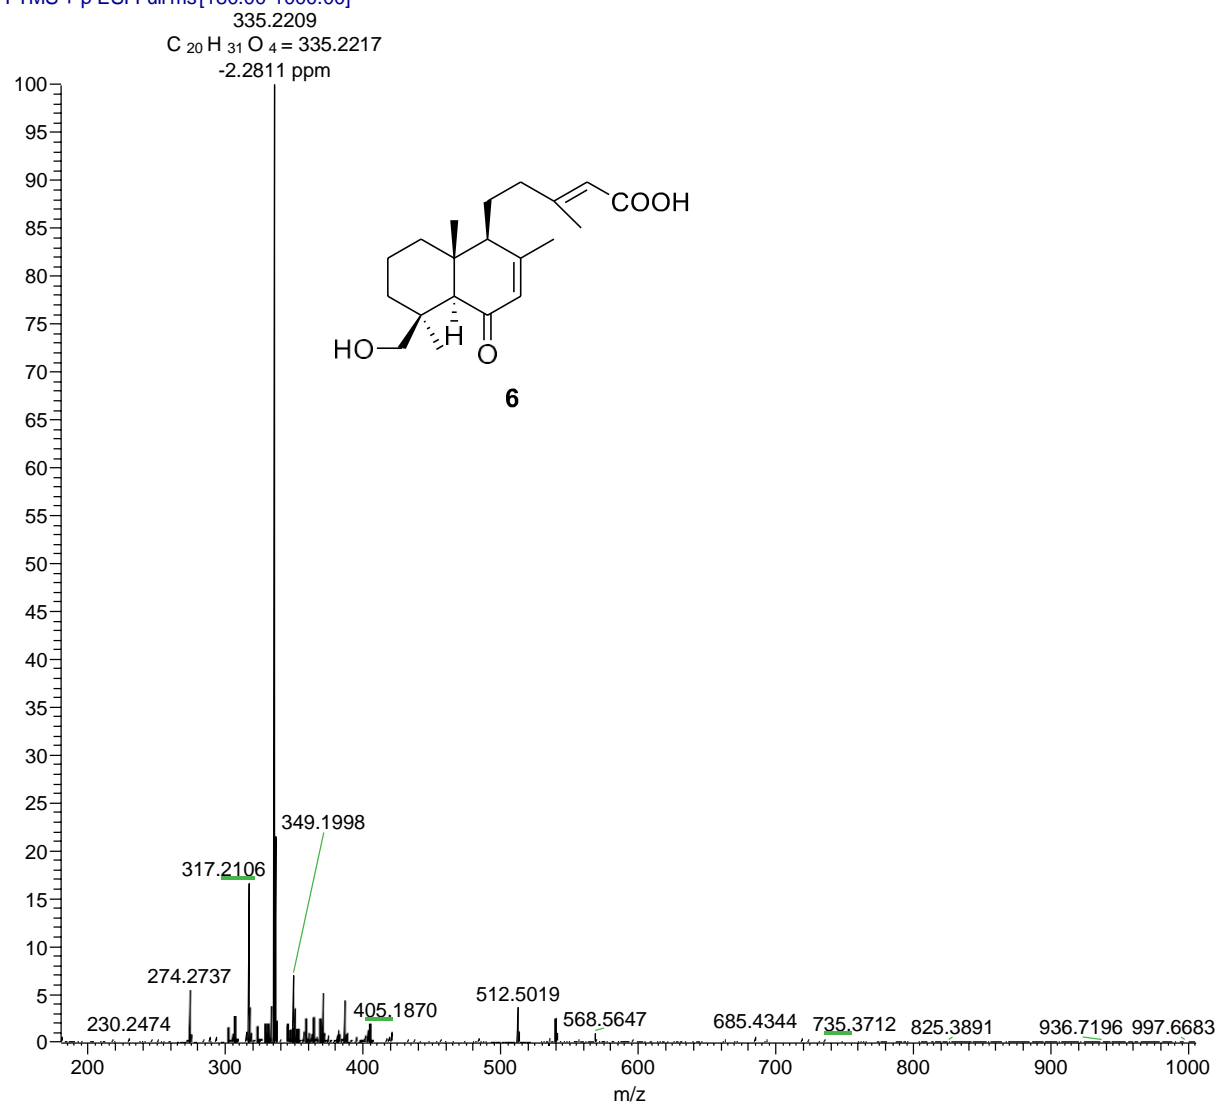

**Figure S43.** UV spectrum of **6**.

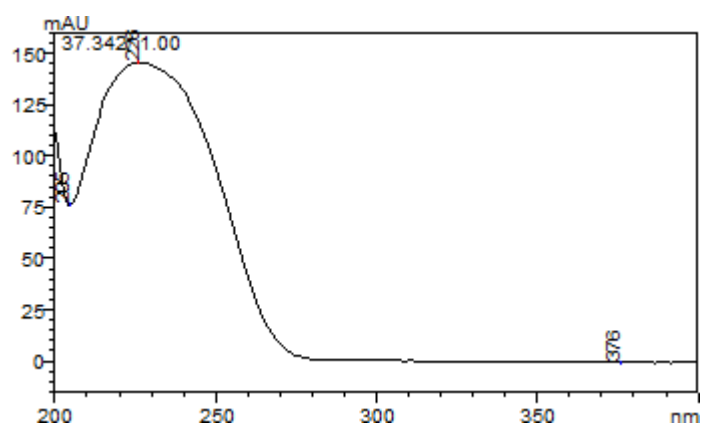



**Figure S46.** HSQC of **7** in CD<sub>3</sub>OD.

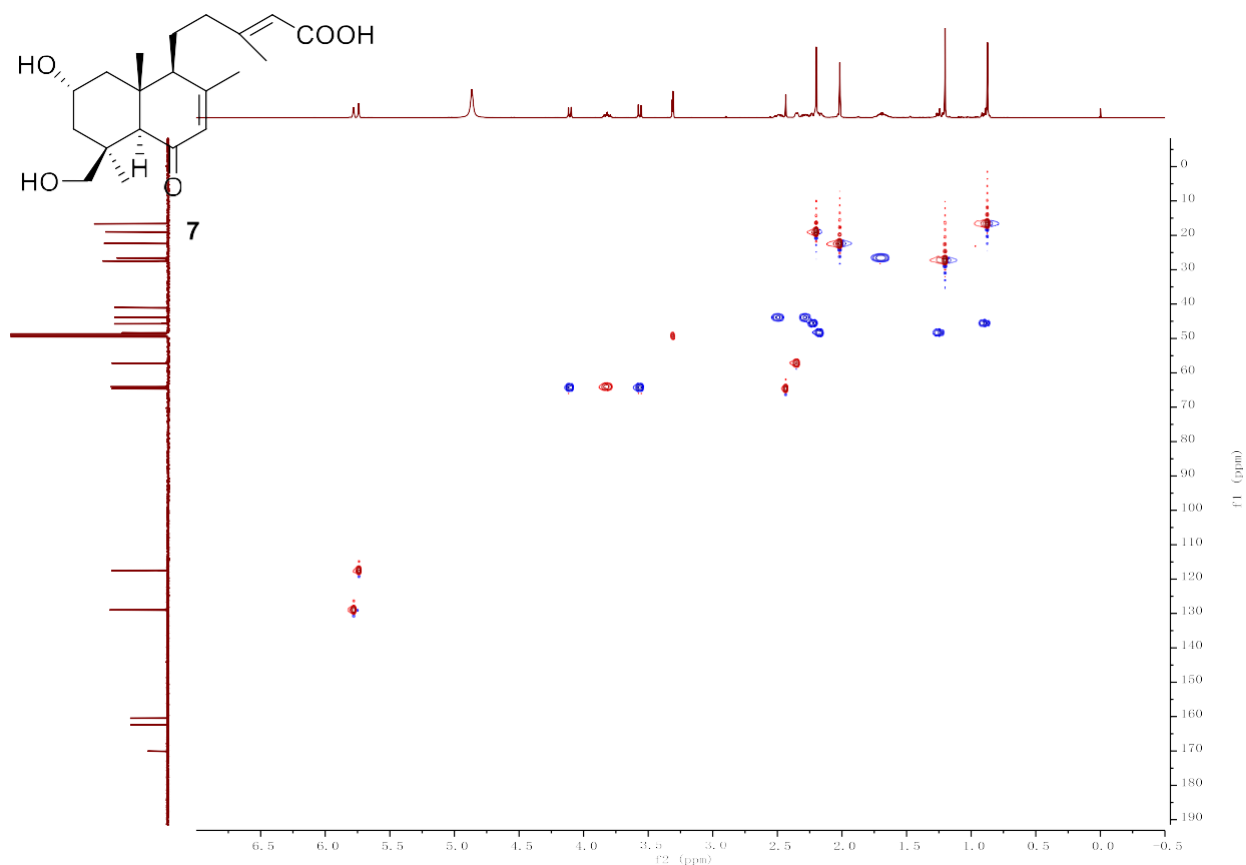

**Figure S47.** HMBC of **7** in CD<sub>3</sub>OD.

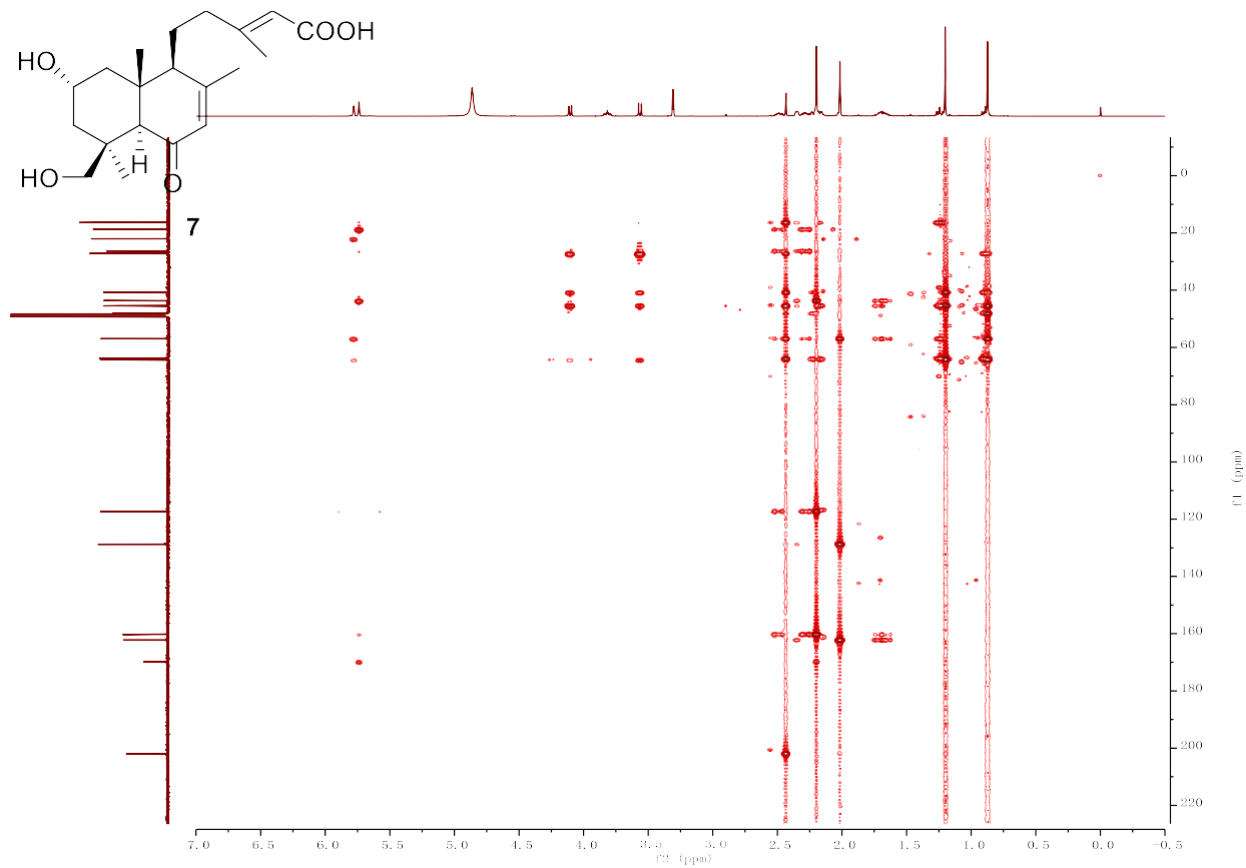

**Figure S48.**  $^1\text{H}$ - $^1\text{H}$  COSY of **7** in  $\text{CD}_3\text{OD}$ .

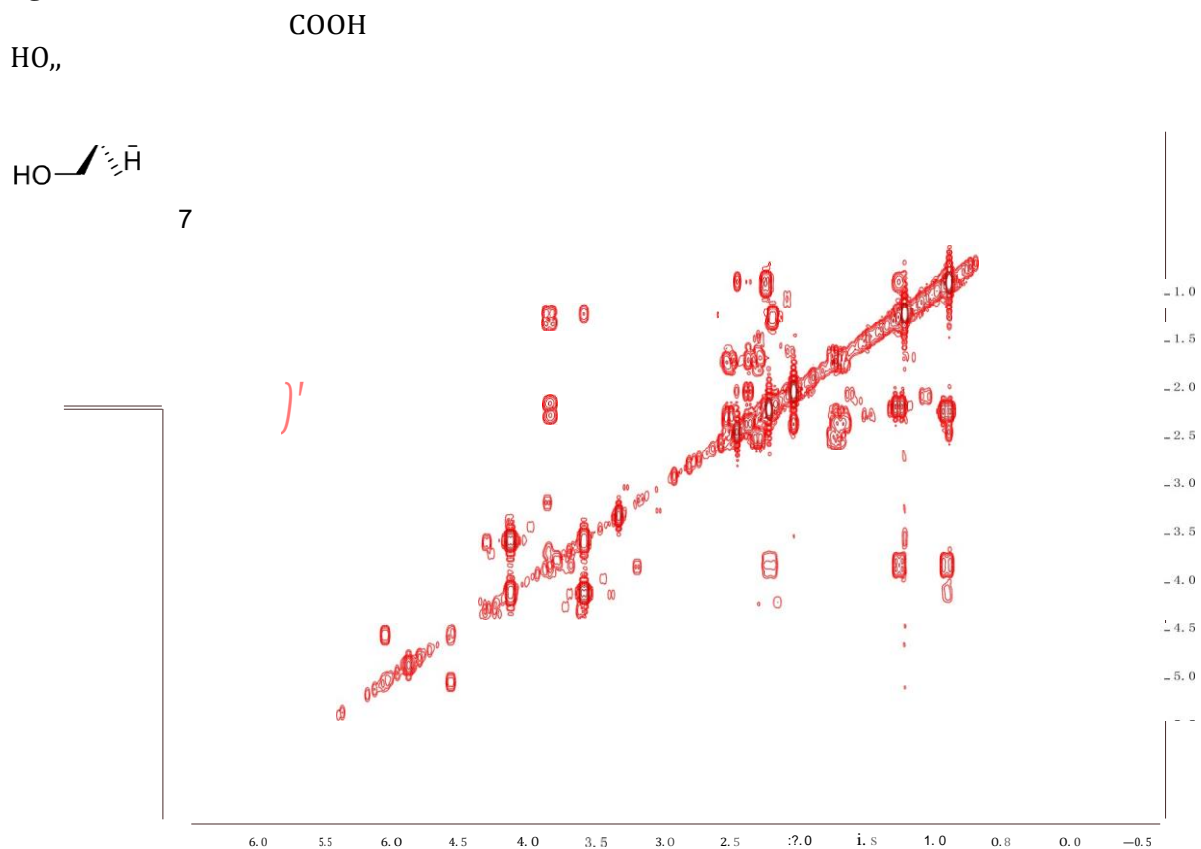

**Figure S49.** ROESY of **7** in  $\text{CD}_3\text{OD}$ .

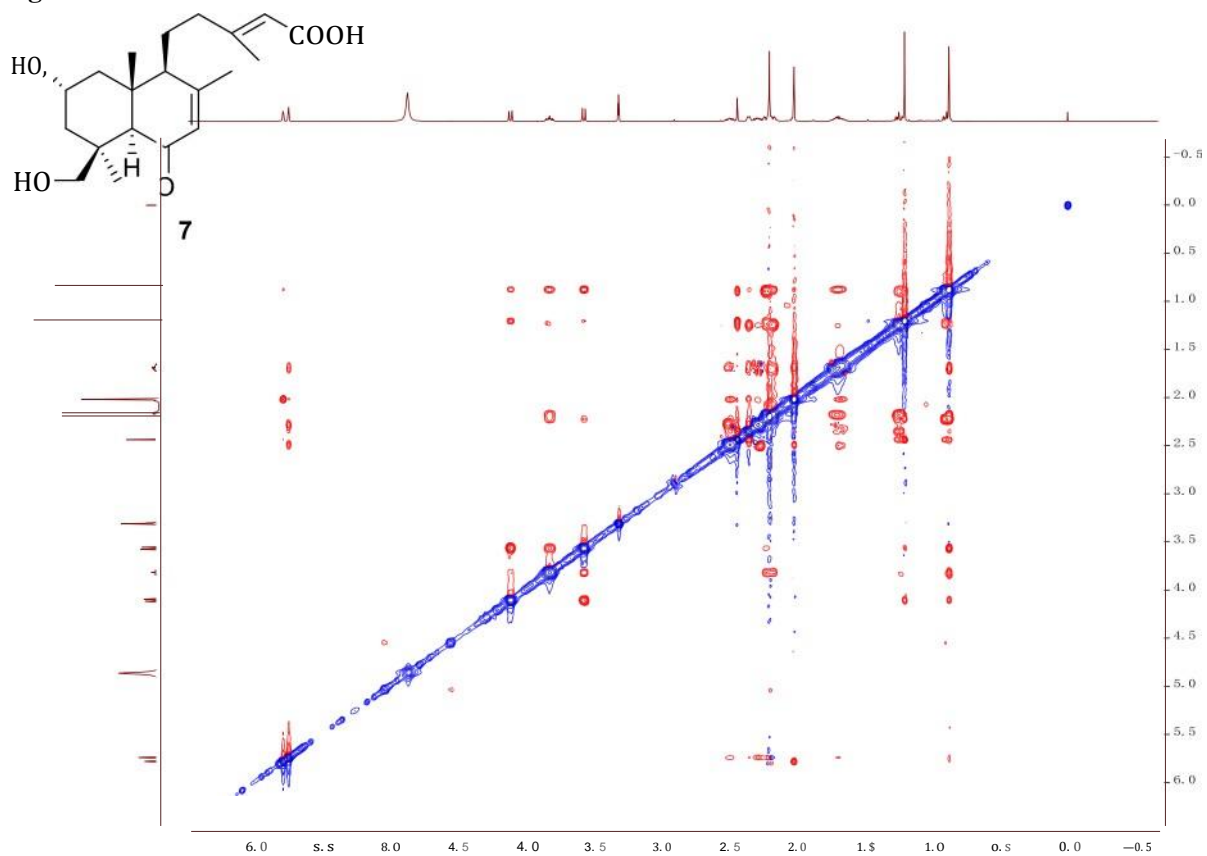

**Figure S50.** HRESIMS of **7**.

ZFL-151403-8 #15-16 RT: 0.13-0.14 AV: 2 NL: 1.69E7

T: FTMS + p ESI Full ms[180.00-1000.00]

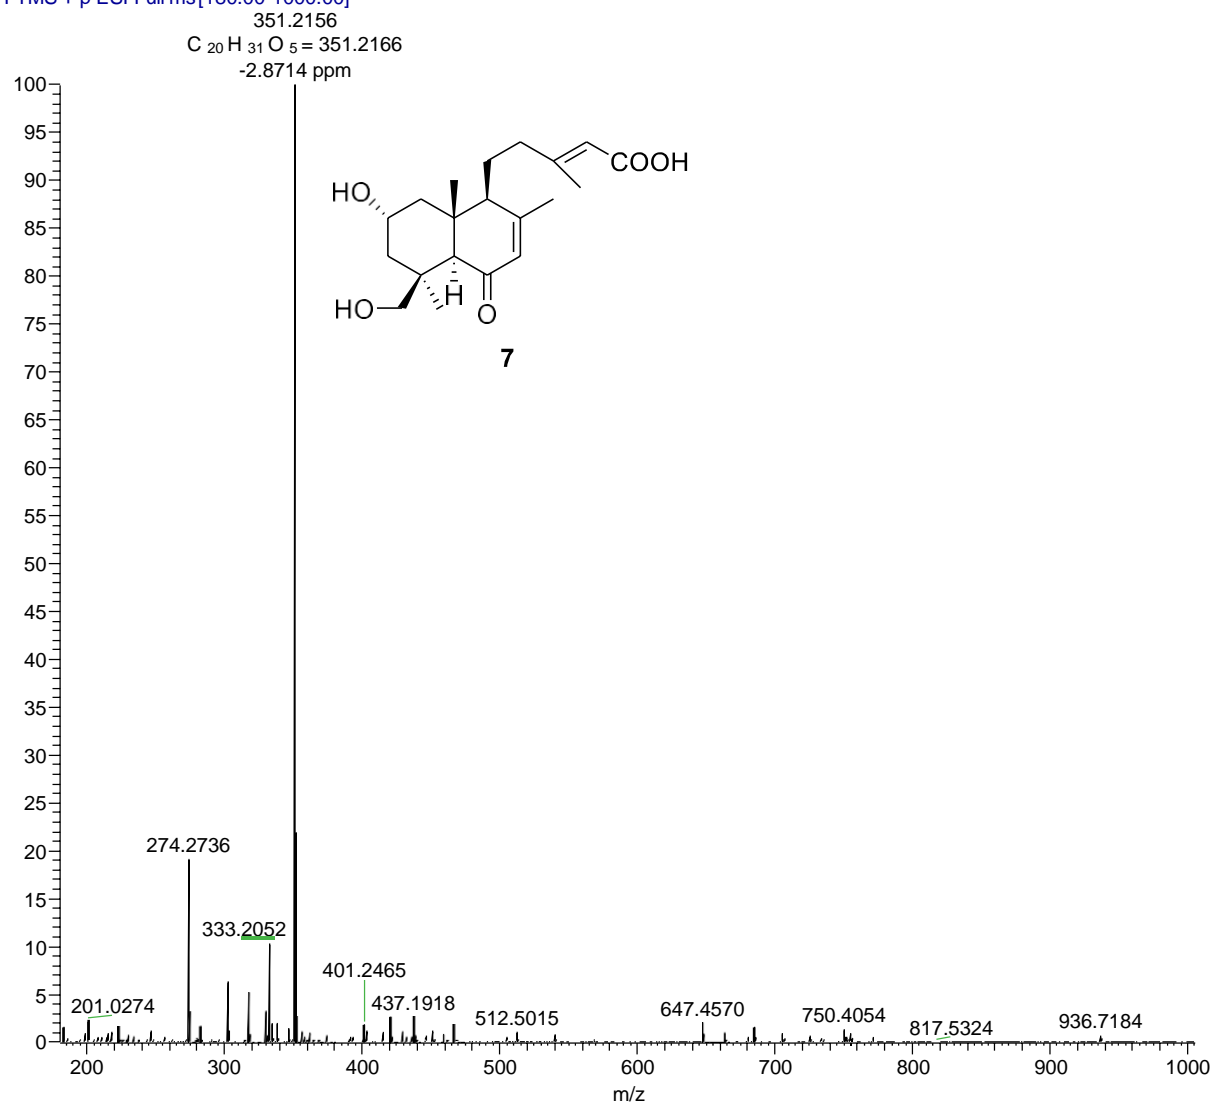

**Figure S51.** UV spectrum of **7**.

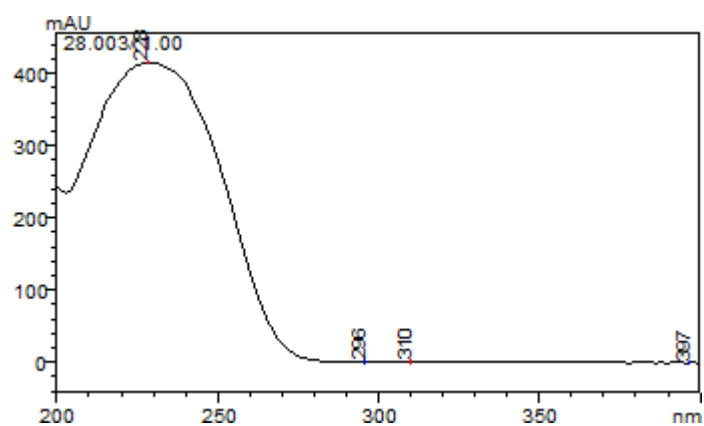

<sup>13</sup>C NMR spectrum of compound 10a in CDCl<sub>3</sub>. The spectrum shows peaks from 15.0 to 57.1 ppm. Key peaks are labeled: 57.1, 56.0, 40.7, 40.4, 40.2, 39.3, 38.3, 28.9, 28.6, 25.3, 22.8, 18.9, 16.1, 15.0. A large solvent peak is visible at 77.1 ppm.



**Figure S54.**  $^1\text{H}$  NMR of **2** in  $\text{CD}_3\text{OD}$ .

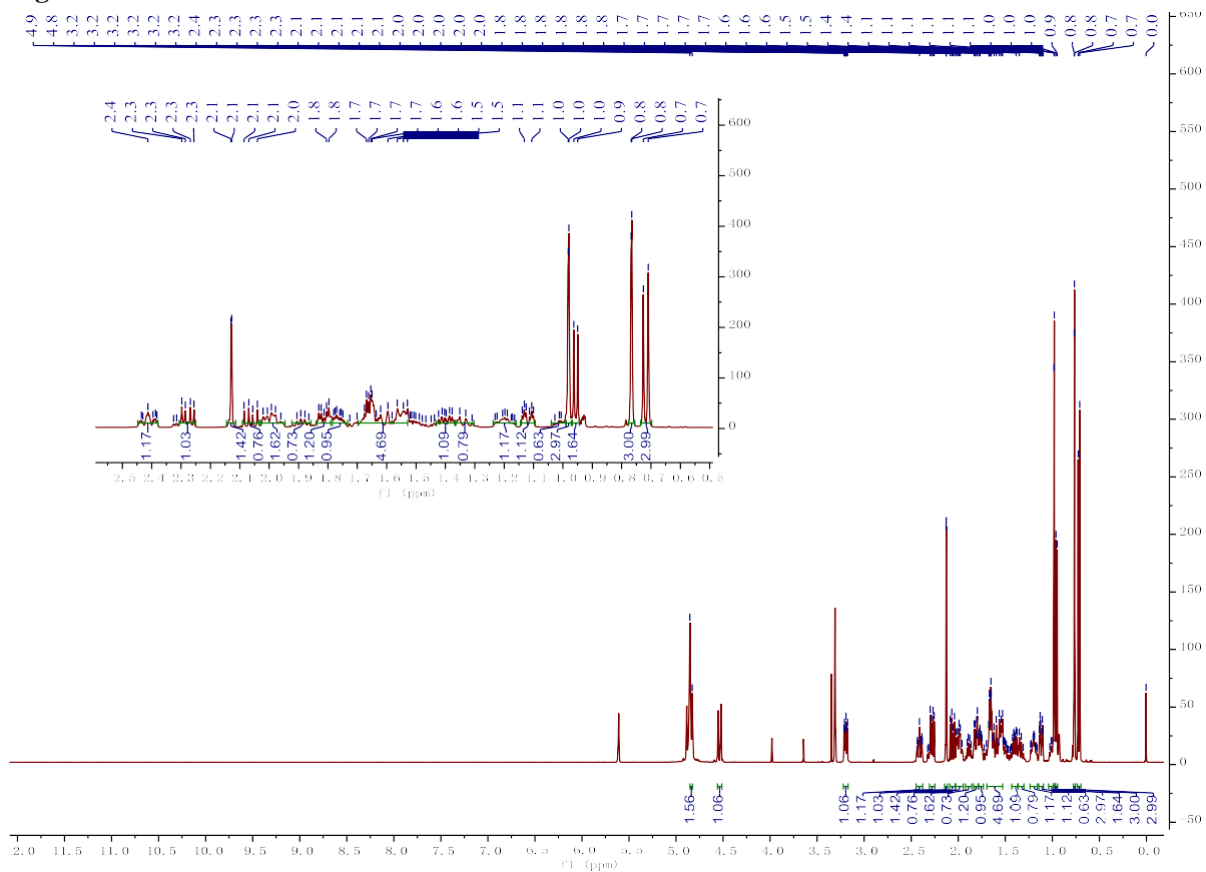

**Figure S55.**  $^{13}\text{C}$  NMR of **2** in  $\text{CD}_3\text{OD}$ .

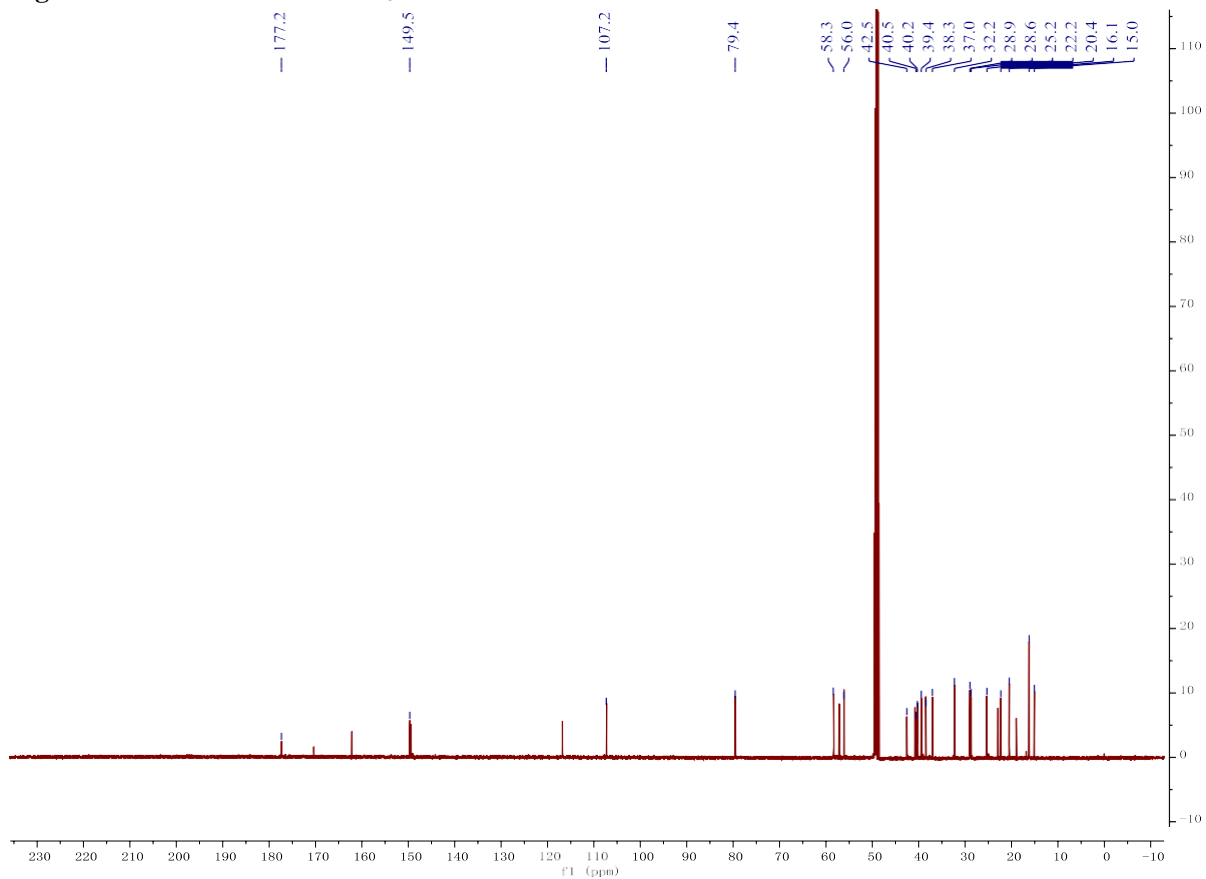

**Figure S56.**  $^1\text{H}$  NMR of **8** in  $\text{CD}_3\text{OD}$ .

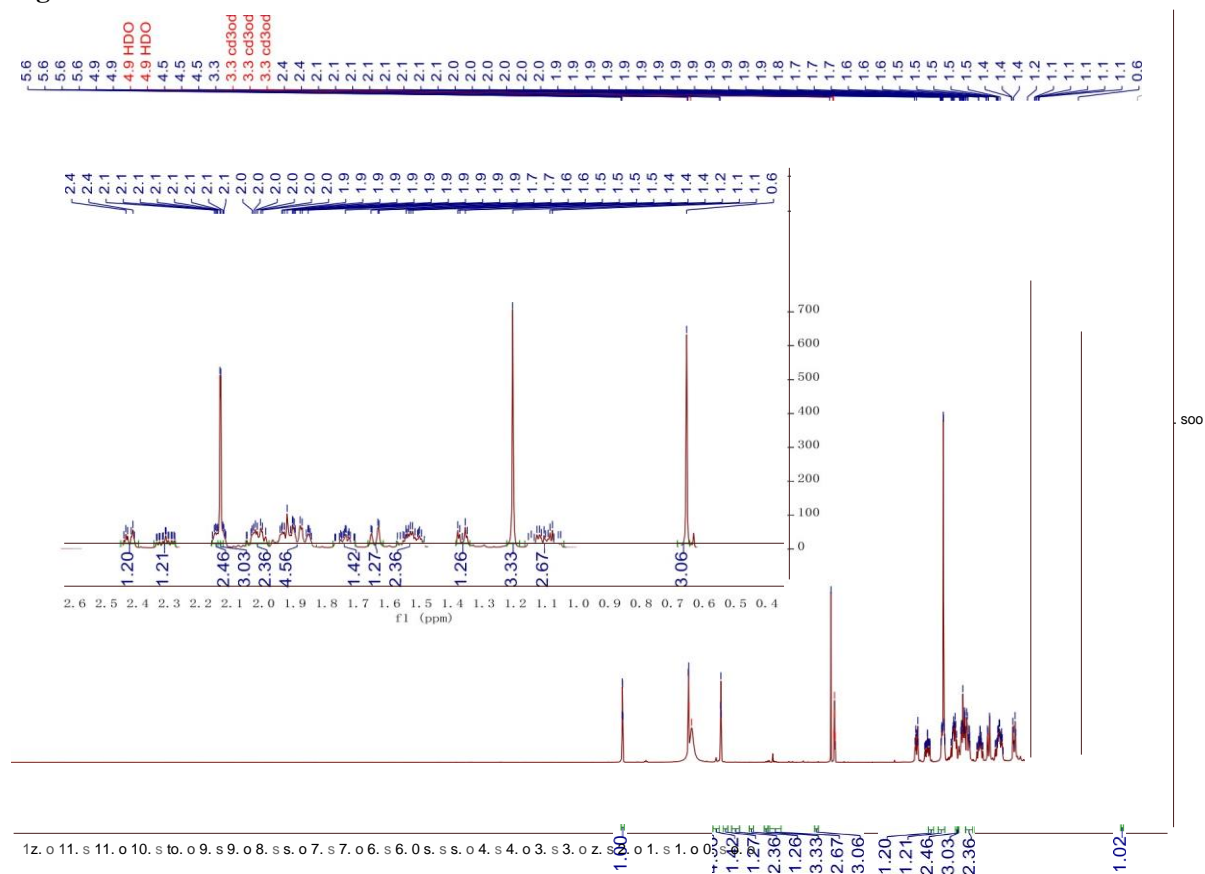

**Figure S57.**  $^{13}\text{C}$  NMR of **8** in  $\text{CD}_3\text{OD}$ .

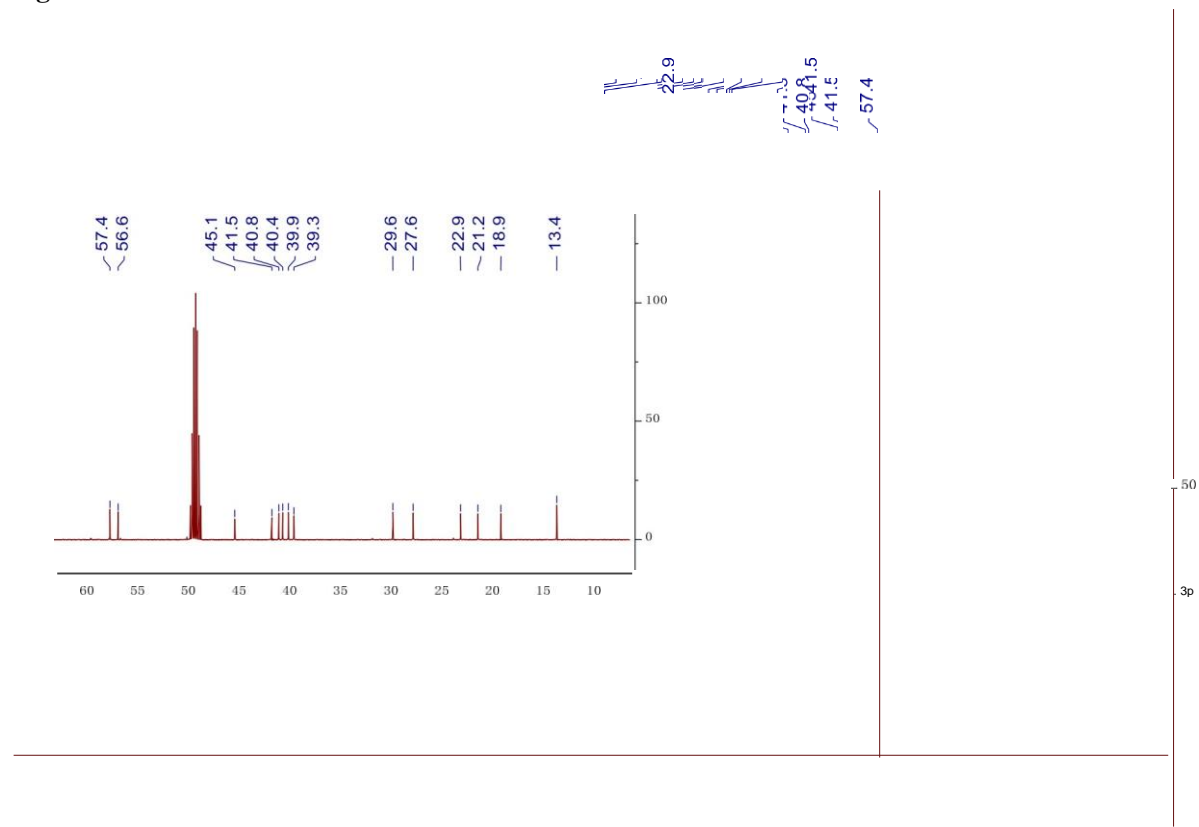

Figure 1 displays two  $^{13}\text{C}$  NMR spectra of compound **1** in  $\text{CDCl}_3$ . The top spectrum shows the full range from 10 to 230 ppm, with peaks assigned to various carbon environments. The bottom spectrum is an expansion of the 10–60 ppm region, highlighting the aliphatic and solvent signals. The chemical shift values (ppm) for the peaks are listed above the corresponding signals.

| Chemical Shift (ppm) |
|----------------------|
| 180.5                |
| 170.2                |
| 161.9                |
| 148.8                |
| 116.8                |
| 107.6                |
| 65.5                 |
| 56.7                 |
| 56.5                 |
| 48.9                 |
| 47.5                 |
| 46.0                 |
| 42.4                 |
| 40.7                 |
| 39.6                 |
| 29.5                 |
| 27.1                 |
| 23.0                 |
| 18.9                 |
| 14.2                 |

**Figure S60.**  $^1\text{H}$  NMR of **10** in  $\text{CD}_3\text{OD}$ .

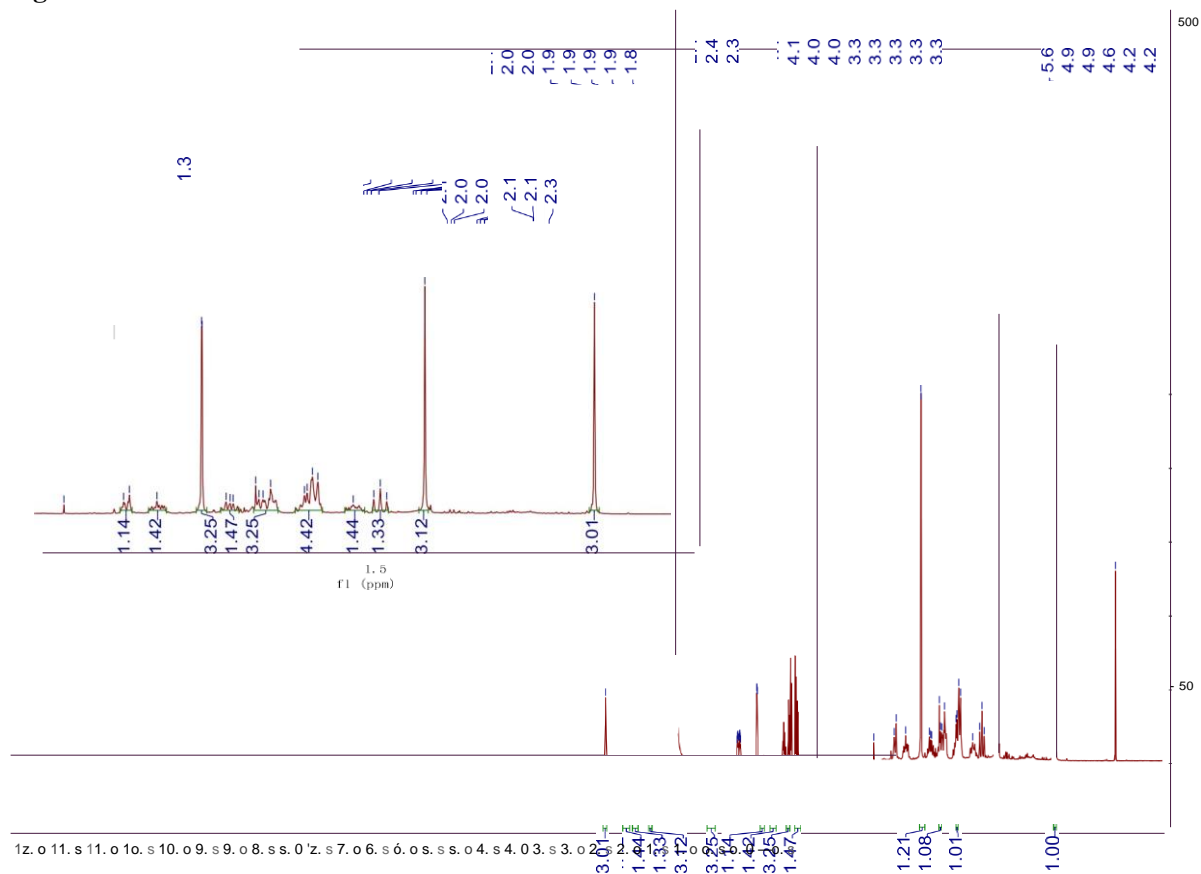

**Figure S61.**  $^{13}\text{C}$  NMR of **10** in  $\text{CD}_3\text{OD}$ .

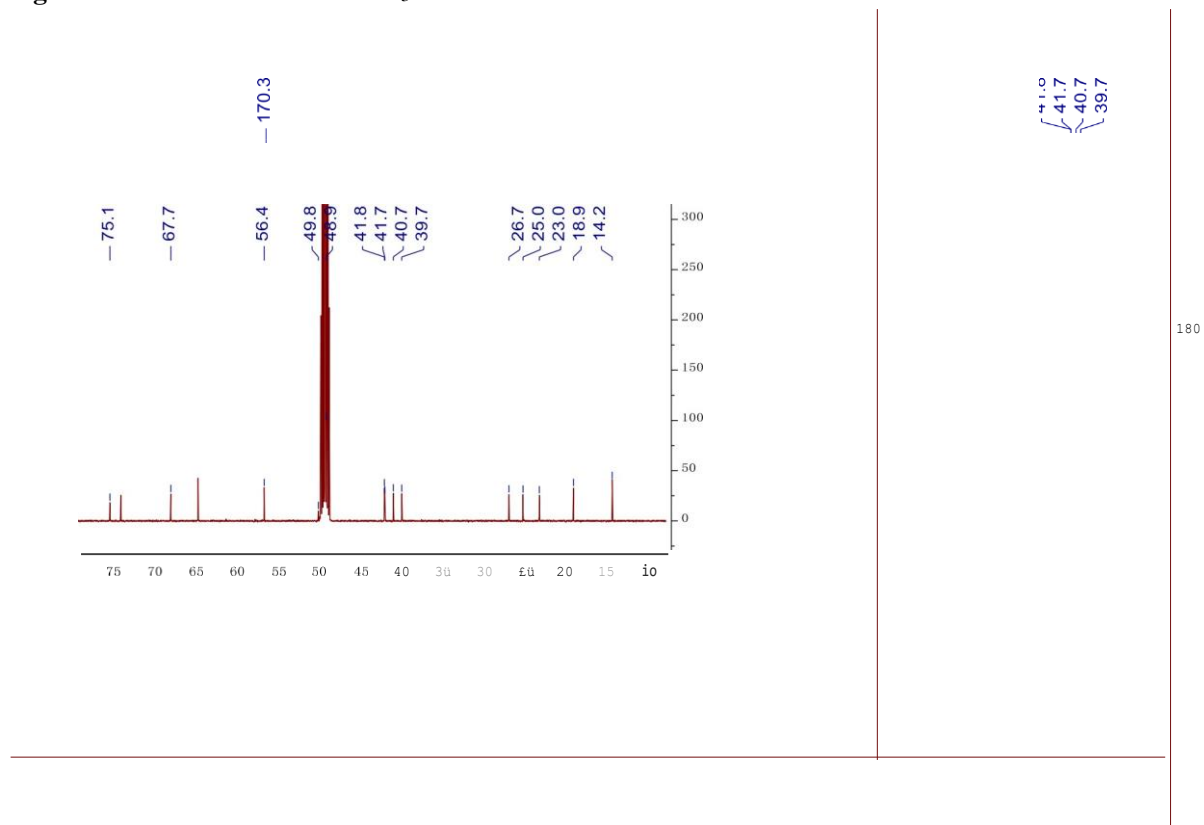

**Figure S62.**  $^1\text{H}$  NMR of **11** in  $\text{CD}_3\text{OD}$ .

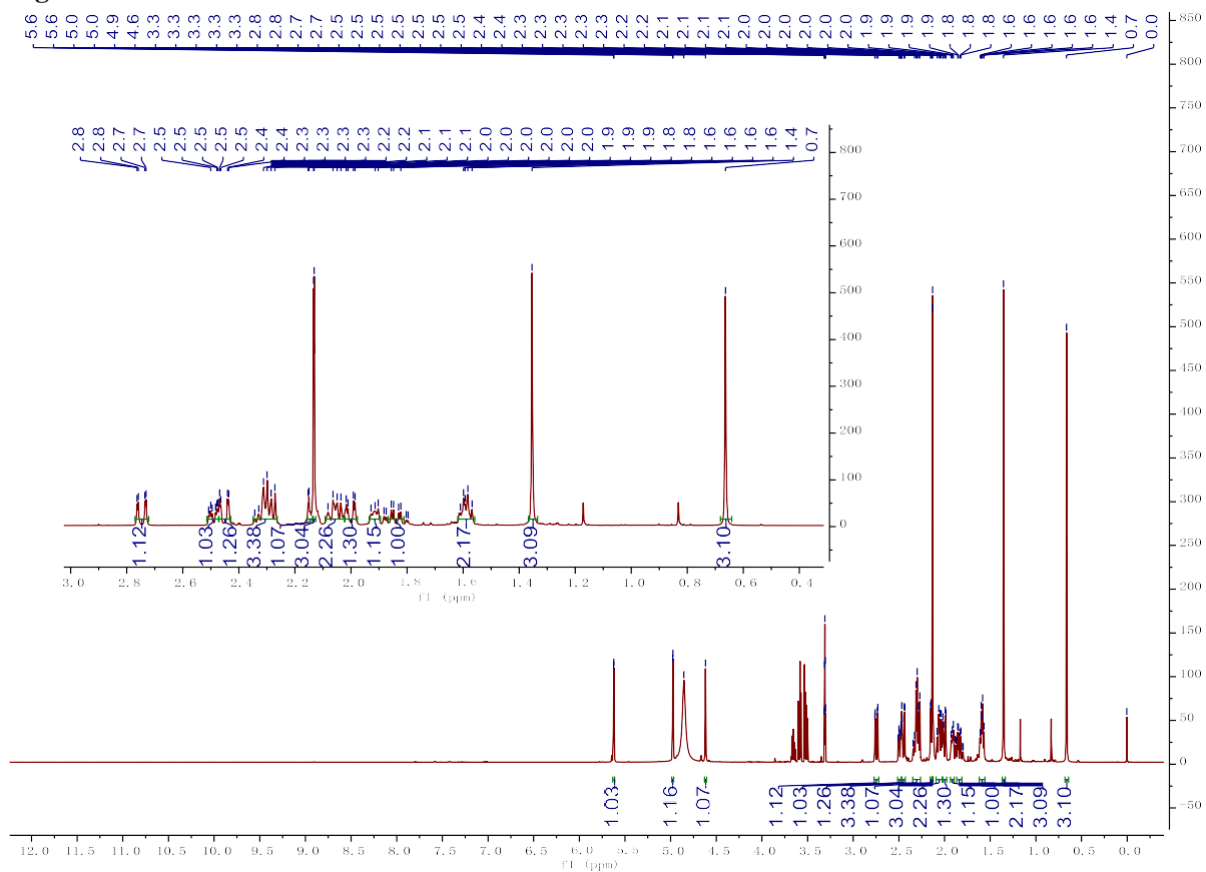

**Figure S63.**  $^{13}\text{C}$  NMR of **11** in  $\text{CD}_3\text{OD}$ .

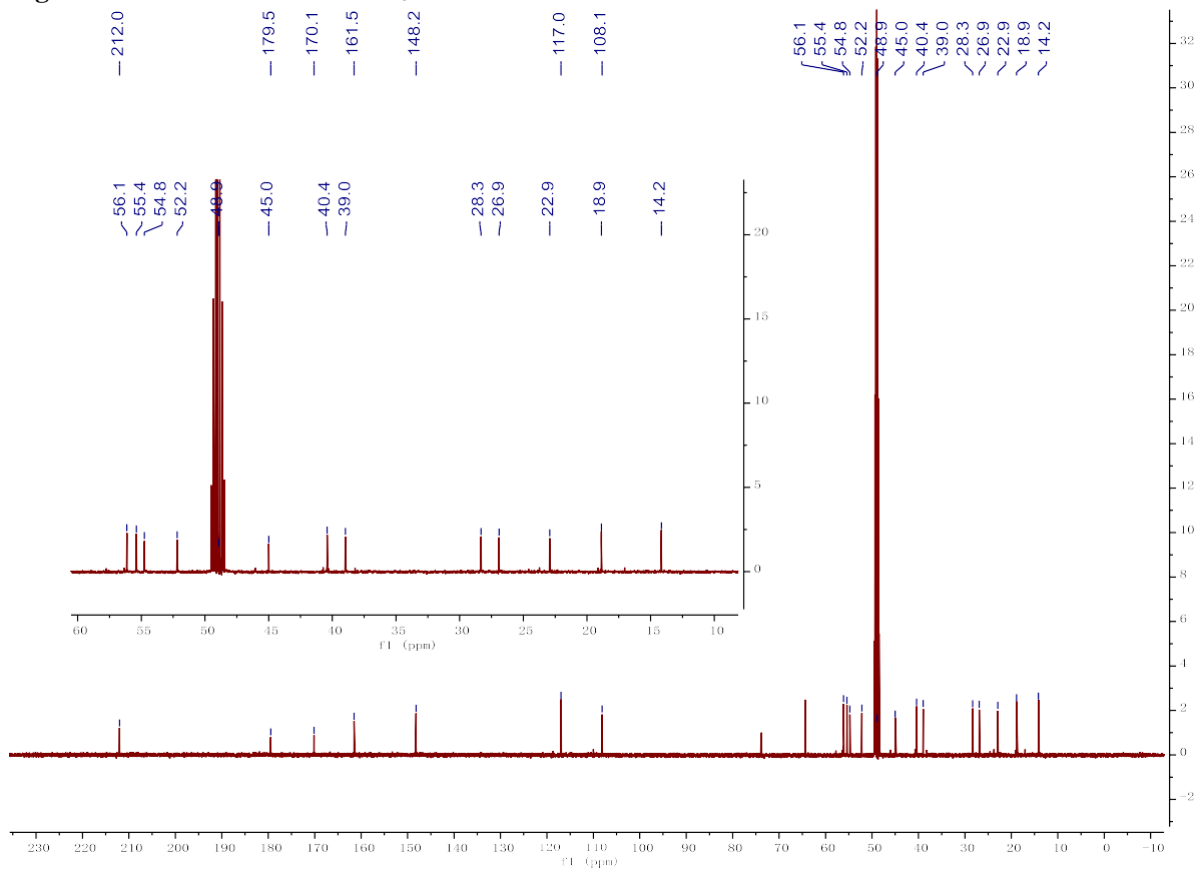

**Figure S64.**  $^1\text{H}$  NMR of **12** in  $\text{CD}_3\text{OD}$ .

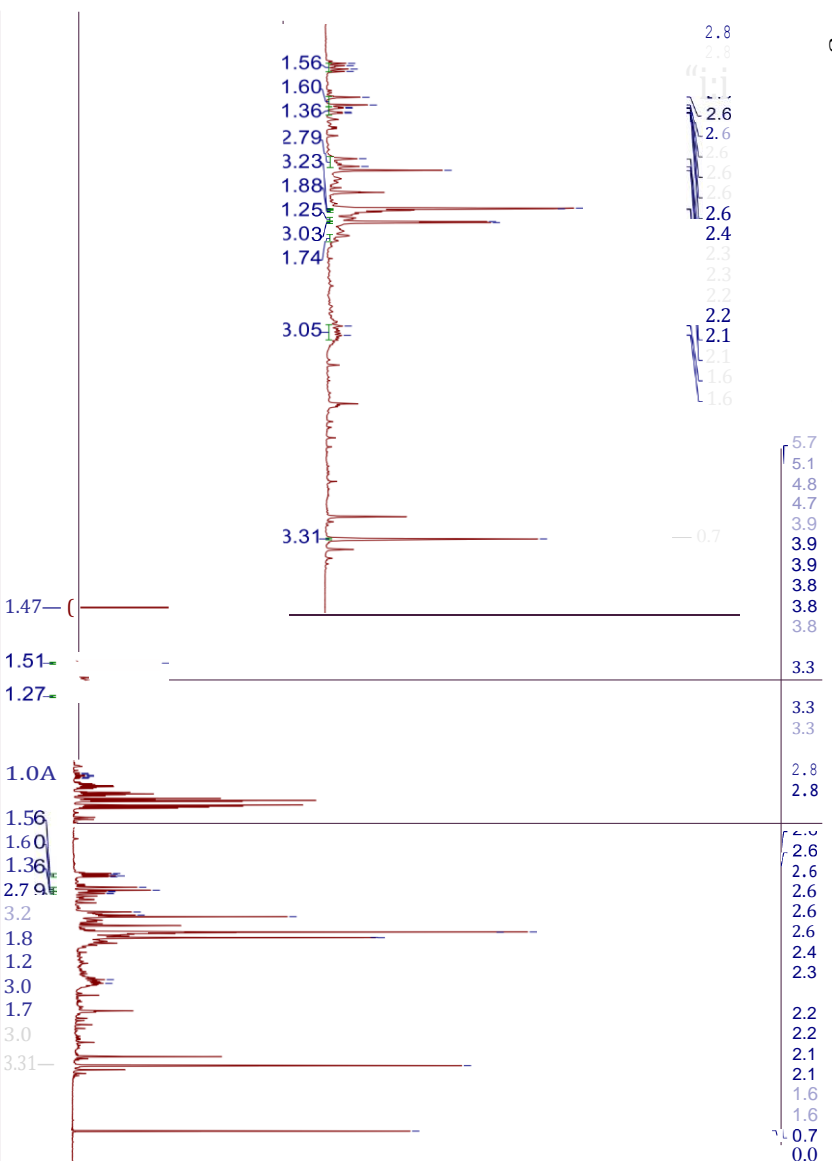

**Figure S65.**  $^{13}\text{C}$  NMR of **12** in  $\text{CD}_3\text{OD}$ .

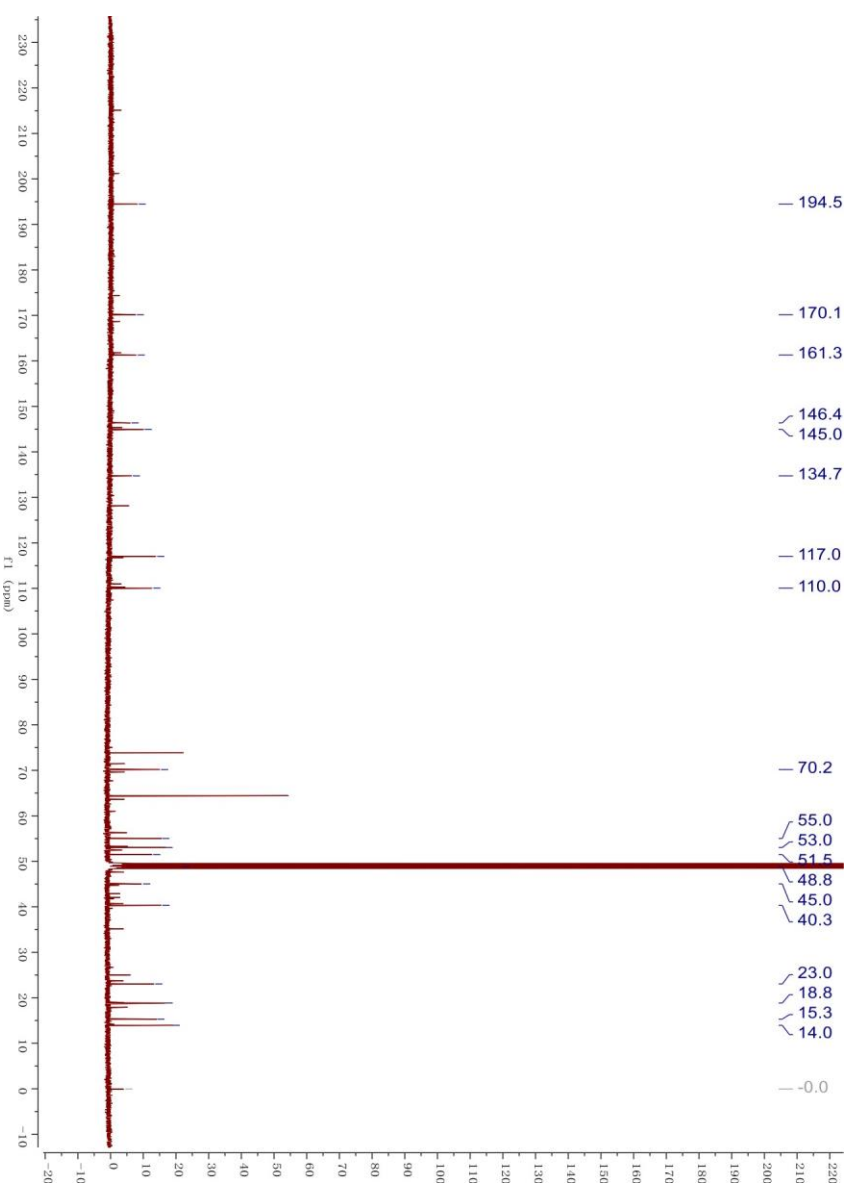

[illegible]

The figure displays two stacked  $^{13}\text{C}$  NMR spectra of compound **1**. The top spectrum is the  $^1\text{H}$  NMR spectrum, and the bottom spectrum is the  $^{13}\text{C}$  NMR spectrum. Both spectra are labeled with their respective chemical shifts in ppm.

**$^1\text{H}$  NMR Spectrum (Top):**

- Chemical shifts (ppm): 52.9, 52.2, 51.9, 43.0, 40.5, 39.3, 38.5, 24.7, 18.9, 10.4.

**$^{13}\text{C}$  NMR Spectrum (Bottom):**

- Chemical shifts (ppm): 180.9, 173.9, 173.3, 170, 160.8, 142.8, 117.1, 114.3, 78.7, 52.9, 52.2, 51.9, 43.0, 40.5, 39.3, 38.5, 24.7, 18.9, 10.4.

**Figure S68.** Main conformers of (2*R*\*,4*S*\*,5*R*\*,9*S*\*,10*R*\*)-**3** in ECD calculations and the energy analysis for optimized geometries of dominant conformers at B3LYP/6-31G(d)-GD3BJ level in the gas phase.

|                                                                                     |                                                                                     |                                                                                      |                                                                                       |
|-------------------------------------------------------------------------------------|-------------------------------------------------------------------------------------|--------------------------------------------------------------------------------------|---------------------------------------------------------------------------------------|
| 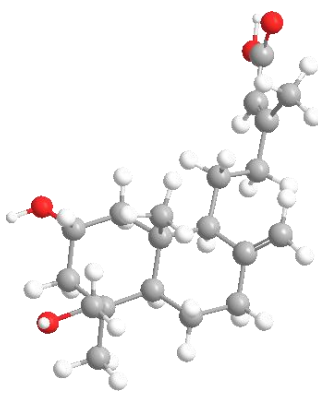   |    |    |    |
| (2 <i>R</i> *,4 <i>S</i> *,5 <i>R</i> *,9 <i>S</i> *,10 <i>R</i> *)- <b>3A</b>      | (2 <i>R</i> *,4 <i>S</i> *,5 <i>R</i> *,9 <i>S</i> *,10 <i>R</i> *)- <b>3B</b>      | (2 <i>R</i> *,4 <i>S</i> *,5 <i>R</i> *,9 <i>S</i> *,10 <i>R</i> *)- <b>3C</b>       | (2 <i>R</i> *,4 <i>S</i> *,5 <i>R</i> *,9 <i>S</i> *,10 <i>R</i> *)- <b>3D</b>        |
|   |   |   |   |
| (2 <i>R</i> *,4 <i>S</i> *,5 <i>R</i> *,9 <i>S</i> *,10 <i>R</i> *)- <b>3E</b>      | (2 <i>R</i> *,4 <i>S</i> *,5 <i>R</i> *,9 <i>S</i> *,10 <i>R</i> *)- <b>3F</b>      | (2 <i>R</i> *,4 <i>S</i> *,5 <i>R</i> *,9 <i>S</i> *,10 <i>R</i> *)- <b>3G</b>       | (2 <i>R</i> *,4 <i>S</i> *,5 <i>R</i> *,9 <i>S</i> *,10 <i>R</i> *)- <b>3H</b>        |
|  |  |  |  |
| (2 <i>R</i> *,4 <i>S</i> *,5 <i>R</i> *,9 <i>S</i> *,10 <i>R</i> *)- <b>3I</b>      | (2 <i>R</i> *,4 <i>S</i> *,5 <i>R</i> *,9 <i>S</i> *,10 <i>R</i> *)- <b>3J</b>      | (2 <i>R</i> *,4 <i>S</i> *,5 <i>R</i> *,9 <i>S</i> *,10 <i>R</i> *)- <b>3K</b>       | (2 <i>R</i> *,4 <i>S</i> *,5 <i>R</i> *,9 <i>S</i> *,10 <i>R</i> *)- <b>3L</b>        |
|  |  |                                                                                      |                                                                                       |
| (2 <i>R</i> *,4 <i>S</i> *,5 <i>R</i> *,9 <i>S</i> *,10 <i>R</i> *)- <b>3M</b>      | (2 <i>R</i> *,4 <i>S</i> *,5 <i>R</i> *,9 <i>S</i> *,10 <i>R</i> *)- <b>3N</b>      |                                                                                      |                                                                                       |

Continued



Energy analysis:

| Species   | $E'=E+ZPE$   | $E$          | $H$          | $G$          | $\Delta G$ | $\Delta E(\text{kcal/mol})$ | $PE\%$ |
|-----------|--------------|--------------|--------------|--------------|------------|-----------------------------|--------|
| <b>3A</b> | -1081.878860 | -1081.853347 | -1081.852403 | -1081.934377 | 0.002713   | 1.702433                    | 1.44%  |
| <b>3B</b> | -1081.879043 | -1081.853539 | -1081.852595 | -1081.934699 | 0.002391   | 1.500375                    | 2.03%  |
| <b>3C</b> | -1081.879732 | -1081.854358 | -1081.853414 | -1081.935064 | 0.002026   | 1.271334                    | 2.98%  |
| <b>3D</b> | -1081.881048 | -1081.855650 | -1081.854706 | -1081.936470 | 0.000620   | 0.389056                    | 13.24% |
| <b>3E</b> | -1081.878262 | -1081.852738 | -1081.851794 | -1081.933940 | 0.003150   | 1.976655                    | 0.91%  |
| <b>3F</b> | -1081.881685 | -1081.856369 | -1081.855425 | -1081.937029 | 0.000061   | 0.038278                    | 23.94% |
| <b>3G</b> | -1081.881034 | -1081.855742 | -1081.854798 | -1081.936233 | 0.000857   | 0.537776                    | 10.30% |
| <b>3H</b> | -1081.875604 | -1081.850037 | -1081.849093 | -1081.931337 | 0.005753   | 3.610062                    | 0.06%  |
| <b>3I</b> | -1081.880545 | -1081.855190 | -1081.854245 | -1081.935881 | 0.001209   | 0.758659                    | 7.09%  |
| <b>3J</b> | -1081.881763 | -1081.856494 | -1081.855550 | -1081.937090 | 0          | 0                           | 25.54% |
| <b>3K</b> | -1081.879436 | -1081.853969 | -1081.853025 | -1081.934992 | 0.002098   | 1.316515                    | 2.76%  |
| <b>3L</b> | -1081.880741 | -1081.855375 | -1081.854431 | -1081.936047 | 0.001043   | 0.654492                    | 8.46%  |
| <b>3M</b> | -1081.878896 | -1081.853615 | -1081.852671 | -1081.934242 | 0.002848   | 1.787147                    | 1.25%  |
| <b>3N</b> | -1081.878860 | -1081.853347 | -1081.852403 | -1081.934377 | 0.002713   | 1.702433                    | 1.44%  |

$E$ ,  $E'$ ,  $H$ ,  $G$ : total energy, total energy with zero point energy ( $ZPE$ ), enthalpy, and Gibbs free energy.

**Figure S69.** Main conformers of (5*S*\*,6*S*\*,9*S*\*,10*R*\*)-4 in ECD calculations and the energy analysis for optimized geometries of dominant conformers at B3LYP/6-31G(d)-GD3BJ level in the gas phase.

|                                                                                    |                                                                                   |                                                                                    |                                                                                     |
|------------------------------------------------------------------------------------|-----------------------------------------------------------------------------------|------------------------------------------------------------------------------------|-------------------------------------------------------------------------------------|
| 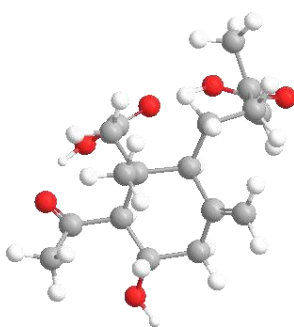  |  |  |  |
| (5 <i>S</i> *,6 <i>S</i> *,9 <i>S</i> *,10 <i>R</i> *)-4A                          | (5 <i>S</i> *,6 <i>S</i> *,9 <i>S</i> *,10 <i>R</i> *)-4B                         | (5 <i>S</i> *,6 <i>S</i> *,9 <i>S</i> *,10 <i>R</i> *)-4C                          | (5 <i>S</i> *,6 <i>S</i> *,9 <i>S</i> *,10 <i>R</i> *)-4D                           |
|  |                                                                                   |                                                                                    |                                                                                     |
| (5 <i>S</i> *,6 <i>S</i> *,9 <i>S</i> *,10 <i>R</i> *)-4E                          |                                                                                   |                                                                                    |                                                                                     |

Energy analysis:

| Species   | $E'=E+ZPE$   | $E$          | $H$          | $G$          | $\Delta G$ | $\Delta E(\text{kcal/mol})$ | $PE\%$ |
|-----------|--------------|--------------|--------------|--------------|------------|-----------------------------|--------|
| <b>4A</b> | -1152.592400 | -1152.568190 | -1152.567245 | -1152.644168 | 0.000854   | 0.535893                    | 15.36% |
| <b>4B</b> | -1152.592903 | -1152.568743 | -1152.567799 | -1152.644605 | 0.000417   | 0.261671                    | 24.41% |
| <b>4C</b> | -1152.592563 | -1152.568277 | -1152.567333 | -1152.644509 | 0.000513   | 0.321912                    | 22.05% |
| <b>4D</b> | -1152.586308 | -1152.561675 | -1152.560731 | -1152.640050 | 0.004972   | 3.119977                    | 0.20%  |
| <b>4E</b> | -1152.593162 | -1152.568934 | -1152.567989 | -1152.645022 | 0          | 0                           | 37.98% |

$E$ ,  $E'$ ,  $H$ ,  $G$ : total energy, total energy with zero point energy (ZPE), enthalpy, and Gibbs free energy.

**Figure S70.** Main conformers of (2*S*\*,5*S*\*,9*S*\*,10*R*\*)-**5** in ECD calculations and the energy analysis for optimized geometries of dominant conformers at B3LYP/6-31G(d)-GD3BJ level in the gas phase.

|                                                                                     |                                                                                    |                                                                                     |                                                                                      |
|-------------------------------------------------------------------------------------|------------------------------------------------------------------------------------|-------------------------------------------------------------------------------------|--------------------------------------------------------------------------------------|
| 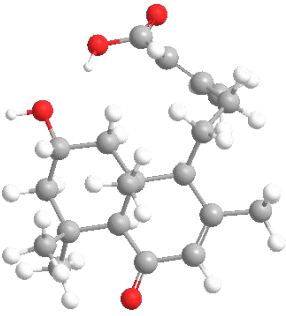   |   |   |   |
| (2 <i>S</i> *,5 <i>S</i> *,9 <i>S</i> *,10 <i>R</i> *)- <b>5A</b>                   | (2 <i>S</i> *,5 <i>S</i> *,9 <i>S</i> *,10 <i>R</i> *)- <b>5B</b>                  | (2 <i>S</i> *,5 <i>S</i> *,9 <i>S</i> *,10 <i>R</i> *)- <b>5C</b>                   | (2 <i>S</i> *,5 <i>S</i> *,9 <i>S</i> *,10 <i>R</i> *)- <b>5D</b>                    |
|   |  |  |  |
| (2 <i>S</i> *,5 <i>S</i> *,9 <i>S</i> *,10 <i>R</i> *)- <b>5E</b>                   | (2 <i>S</i> *,5 <i>S</i> *,9 <i>S</i> *,10 <i>R</i> *)- <b>5F</b>                  | (2 <i>S</i> *,5 <i>S</i> *,9 <i>S</i> *,10 <i>R</i> *)- <b>5G</b>                   | (2 <i>S</i> *,5 <i>S</i> *,9 <i>S</i> *,10 <i>R</i> *)- <b>5H</b>                    |
|  |                                                                                    |                                                                                     |                                                                                      |
| (2 <i>S</i> *,5 <i>S</i> *,9 <i>S</i> *,10 <i>R</i> *)- <b>5I</b>                   |                                                                                    |                                                                                     |                                                                                      |

Energy analysis:

| Species   | $E'=E+ZPE$   | $E$          | $H$          | $G$          | $\Delta G$ | $\Delta E(\text{kcal/mol})$ | $PE\%$ |
|-----------|--------------|--------------|--------------|--------------|------------|-----------------------------|--------|
| <b>5A</b> | -1080.717662 | -1080.692943 | -1080.691999 | -1080.769658 | 0          | 0                           | 86.88% |
| <b>5B</b> | -1080.715230 | -1080.690514 | -1080.689569 | -1080.767185 | 0.002473   | 1.551831                    | 6.32%  |
| <b>5C</b> | -1080.715833 | -1080.691458 | -1080.690514 | -1080.767059 | 0.002599   | 1.630897                    | 5.53%  |
| <b>5D</b> | -1080.706369 | -1080.681167 | -1080.680223 | -1080.761145 | 0.008513   | 5.341988                    | 0.01%  |
| <b>5E</b> | -1080.709286 | -1080.684143 | -1080.683198 | -1080.764062 | 0.005596   | 3.511543                    | 0.23%  |
| <b>5F</b> | -1080.706879 | -1080.681663 | -1080.680719 | -1080.761749 | 0.007909   | 4.962973                    | 0.02%  |
| <b>5G</b> | -1080.706435 | -1080.681248 | -1080.680304 | -1080.760873 | 0.008785   | 5.512671                    | 0.01%  |
| <b>5H</b> | -1080.712743 | -1080.687952 | -1080.687008 | -1080.765247 | 0.004411   | 2.767944                    | 0.81%  |
| <b>5I</b> | -1080.712052 | -1080.687422 | -1080.686478 | -1080.763871 | 0.005787   | 3.631397                    | 0.19%  |

$E$ ,  $E'$ ,  $H$ ,  $G$ : total energy, total energy with zero point energy (ZPE), enthalpy, and Gibbs free energy.

**Figure S71.** Main conformers of (4*S*\*,5*R*\*,9*S*\*,10*R*\*)-6 in ECD calculations and the energy analysis for optimized geometries of dominant conformers at B3LYP/6-31G(d)-GD3BJ level in the gas phase.

|                                                                                     |                                                                                     |                                                                                      |                                                                                      |
|-------------------------------------------------------------------------------------|-------------------------------------------------------------------------------------|--------------------------------------------------------------------------------------|--------------------------------------------------------------------------------------|
| 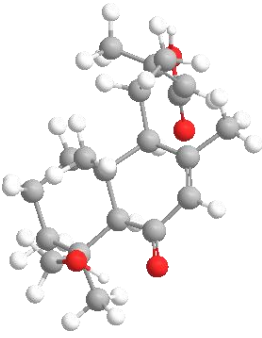   |    |    |   |
| (4 <i>S</i> *,5 <i>R</i> *,9 <i>S</i> *,10 <i>R</i> *)-6A                           | (4 <i>S</i> *,5 <i>R</i> *,9 <i>S</i> *,10 <i>R</i> *)-6B                           | (4 <i>S</i> *,5 <i>R</i> *,9 <i>S</i> *,10 <i>R</i> *)-6C                            | (4 <i>S</i> *,5 <i>R</i> *,9 <i>S</i> *,10 <i>R</i> *)-6D                            |
|   |   |   |  |
| (4 <i>S</i> *,5 <i>R</i> *,9 <i>S</i> *,10 <i>R</i> *)-6E                           | (4 <i>S</i> *,5 <i>R</i> *,9 <i>S</i> *,10 <i>R</i> *)-6F                           | (4 <i>S</i> *,5 <i>R</i> *,9 <i>S</i> *,10 <i>R</i> *)-6G                            | (4 <i>S</i> *,5 <i>R</i> *,9 <i>S</i> *,10 <i>R</i> *)-6H                            |
|  |  |  |                                                                                      |
| (4 <i>S</i> *,5 <i>R</i> *,9 <i>S</i> *,10 <i>R</i> *)-6I                           | (4 <i>S</i> *,5 <i>R</i> *,9 <i>S</i> *,10 <i>R</i> *)-6J                           | (4 <i>S</i> *,5 <i>R</i> *,9 <i>S</i> *,10 <i>R</i> *)-6K                            |                                                                                      |

Energy analysis:

| Species   | $E' = E + ZPE$ | $E$          | $H$          | $G$          | $\Delta G$ | $\Delta E(\text{kcal/mol})$ | $PE\%$ |
|-----------|----------------|--------------|--------------|--------------|------------|-----------------------------|--------|
| <b>6A</b> | -1080.706544   | -1080.682062 | -1080.681118 | -1080.759902 | 0.003619   | 2.270957                    | 2.07%  |
| <b>6B</b> | -1080.703611   | -1080.679003 | -1080.678059 | -1080.757883 | 0.005638   | 3.537899                    | 0.24%  |
| <b>6C</b> | -1080.703810   | -1080.679219 | -1080.678275 | -1080.758068 | 0.005453   | 3.421809                    | 0.30%  |
| <b>6D</b> | -1080.703715   | -1080.679103 | -1080.678159 | -1080.757812 | 0.005709   | 3.582452                    | 0.23%  |
| <b>6E</b> | -1080.703681   | -1080.679044 | -1080.678100 | -1080.758179 | 0.005342   | 3.352156                    | 0.33%  |
| <b>6F</b> | -1080.703487   | -1080.678861 | -1080.677917 | -1080.757901 | 0.005620   | 3.526603                    | 0.25%  |

|           |              |              |              |              |          |          |        |
|-----------|--------------|--------------|--------------|--------------|----------|----------|--------|
| <b>6G</b> | -1080.703210 | -1080.678593 | -1080.677649 | -1080.757010 | 0.006511 | 4.085714 | 0.10%  |
| <b>6H</b> | -1080.703756 | -1080.679099 | -1080.678155 | -1080.758351 | 0.005170 | 3.244224 | 0.40%  |
| <b>6I</b> | -1080.709757 | -1080.685212 | -1080.684267 | -1080.763521 | 0        | 0        | 95.83% |
| <b>6J</b> | -1080.704489 | -1080.680105 | -1080.679161 | -1080.757518 | 0.006003 | 3.766940 | 0.17%  |
| <b>6K</b> | -1080.703570 | -1080.679112 | -1080.678167 | -1080.756959 | 0.006562 | 4.117717 | 0.09%  |

*E, E', H, G*: total energy, total energy with zero point energy (*ZPE*), enthalpy, and Gibbs free energy.

**Figure S72.** Main conformers of (2*R*\*,4*S*\*,5*R*\*,9*S*\*,10*R*\*)-7 in ECD calculations and the energy analysis for optimized geometries of dominant conformers at B3LYP/6-31G(d)-GD3BJ level in the gas phase.

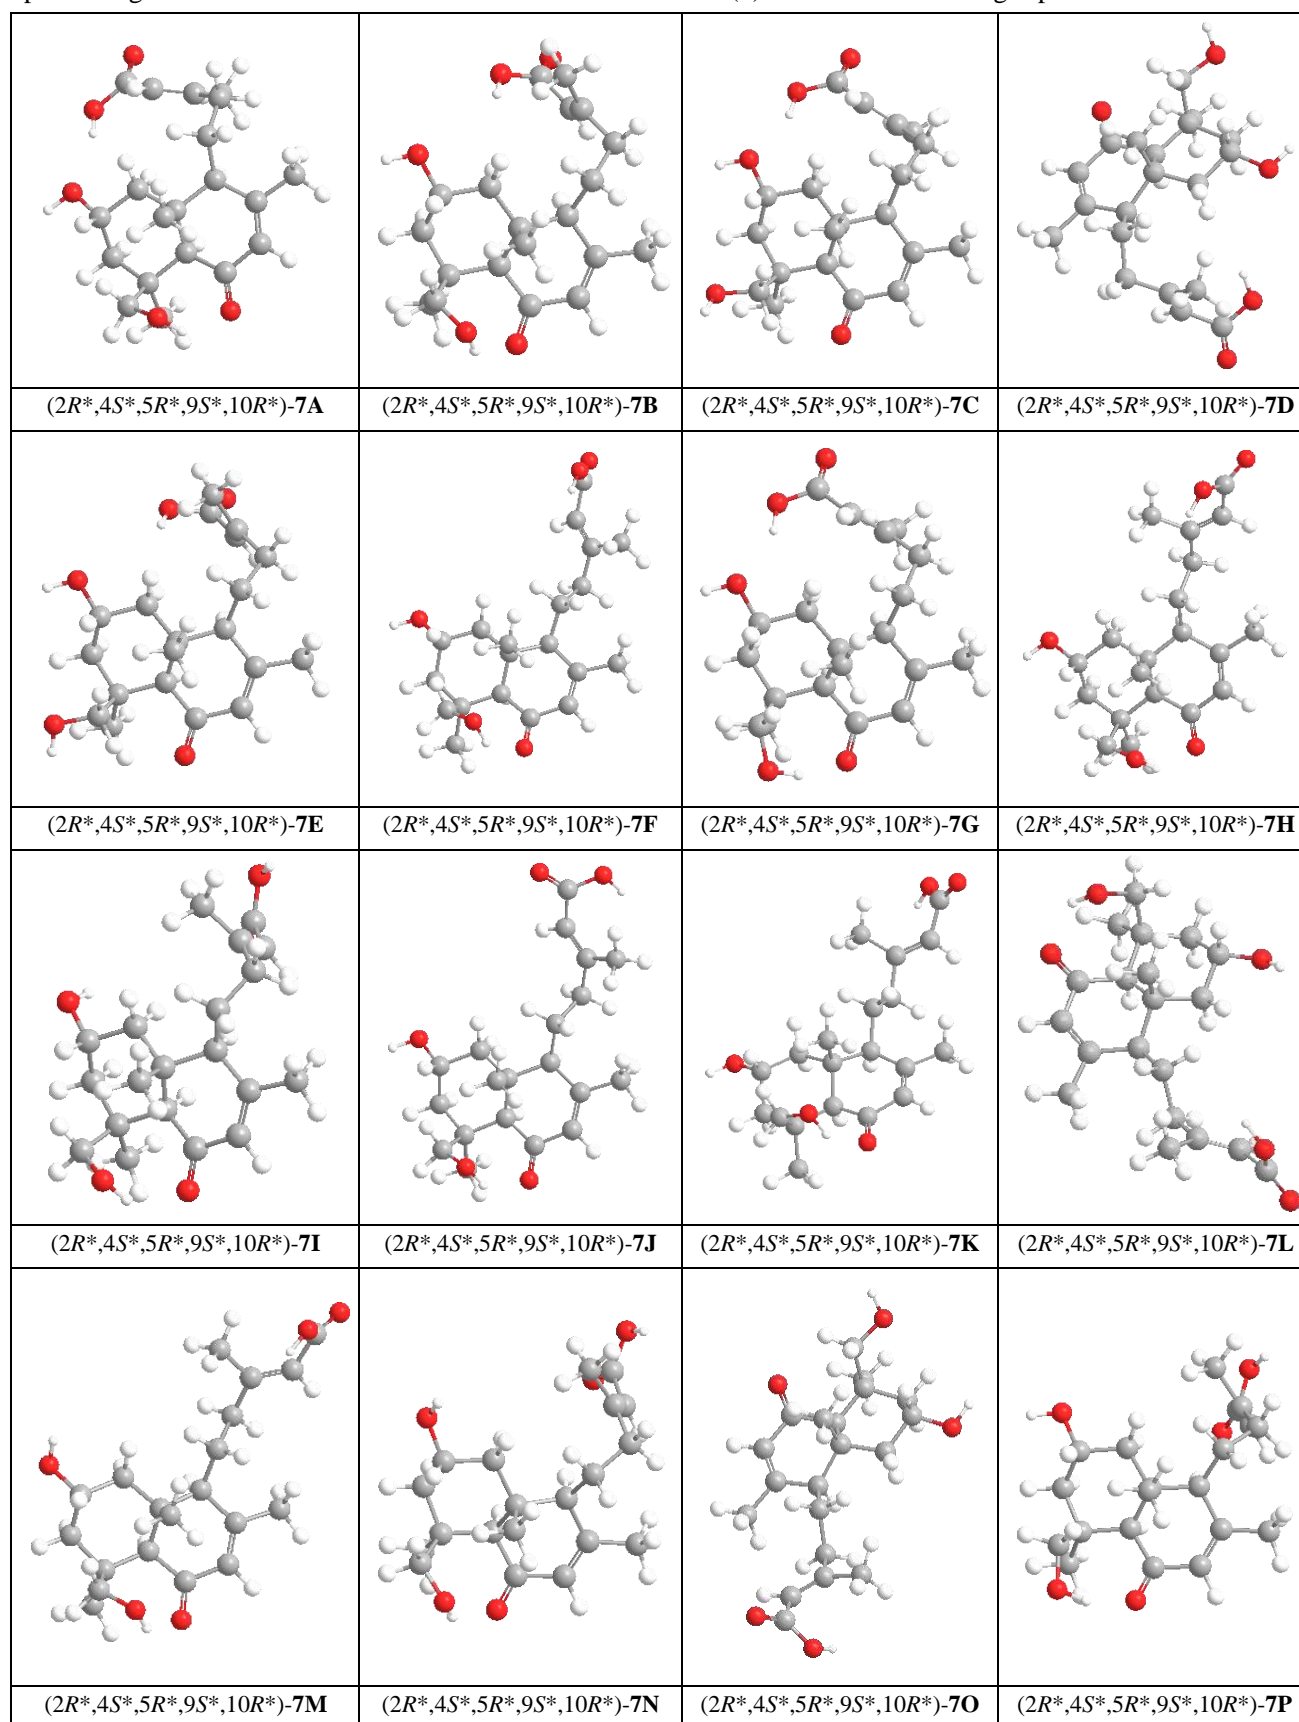

Continued

Energy analysis:

| Species   | $E'=E+ZPE$   | $E$          | $H$          | $G$          | $\Delta G$ | $\Delta E(\text{kcal/mol})$ | $PE\%$ |
|-----------|--------------|--------------|--------------|--------------|------------|-----------------------------|--------|
| <b>7A</b> | -1155.922441 | -1155.896965 | -1155.896021 | -1155.975476 | 0.000342   | 0.214608                    | 38.16% |
| <b>7B</b> | -1155.920260 | -1155.894802 | -1155.893858 | -1155.973178 | 0.002640   | 1.656625                    | 3.34%  |
| <b>7C</b> | -1155.919025 | -1155.893044 | -1155.892100 | -1155.972804 | 0.003014   | 1.891314                    | 2.25%  |
| <b>7D</b> | -1155.916552 | -1155.890566 | -1155.889621 | -1155.970299 | 0.005519   | 3.463225                    | 0.16%  |
| <b>7E</b> | -1155.917810 | -1155.891983 | -1155.891039 | -1155.971399 | 0.004419   | 2.772964                    | 0.51%  |
| <b>7F</b> | -1155.911109 | -1155.885179 | -1155.884235 | -1155.966890 | 0.008928   | 5.602405                    | 0.00%  |
| <b>7G</b> | -1155.922832 | -1155.897425 | -1155.896481 | -1155.975818 | 0          | 0                           | 54.83% |
| <b>7H</b> | -1155.911435 | -1155.885572 | -1155.884627 | -1155.966966 | 0.008852   | 5.554714                    | 0.00%  |
| <b>7I</b> | -1155.918138 | -1155.892645 | -1155.891701 | -1155.971529 | 0.004289   | 2.691388                    | 0.58%  |
| <b>7J</b> | -1155.911082 | -1155.885170 | -1155.884226 | -1155.966547 | 0.009271   | 5.817641                    | 0.00%  |
| <b>7K</b> | -1155.911489 | -1155.885557 | -1155.884612 | -1155.967380 | 0.008438   | 5.294925                    | 0.01%  |
| <b>7L</b> | -1155.910551 | -1155.884611 | -1155.883667 | -1155.966361 | 0.009457   | 5.934357                    | 0.00%  |
| <b>7M</b> | -1155.910572 | -1155.884697 | -1155.883753 | -1155.966123 | 0.009695   | 6.083705                    | 0.00%  |
| <b>7N</b> | -1155.912793 | -1155.886969 | -1155.886025 | -1155.968347 | 0.007471   | 4.688123                    | 0.02%  |
| <b>7O</b> | -1155.908053 | -1155.881551 | -1155.880606 | -1155.964715 | 0.011103   | 6.967238                    | 0.00%  |
| <b>7P</b> | -1155.914765 | -1155.888920 | -1155.887976 | -1155.970102 | 0.005716   | 3.586844                    | 0.13%  |

$E$ ,  $E'$ ,  $H$ ,  $G$ : total energy, total energy with zero point energy ( $ZPE$ ), enthalpy, and Gibbs free energy.

**Supplementary S1.** The Z-matrices of (2R\*,4S\*,5R\*,9S\*,10R\*)-**3** optimized at B3LYP/6-31G(d)-GD3BJ level by Gaussian.

| (2R*,4S*,5R*,9S*,10R*)- <b>3A</b> |         |         |         | (2R*,4S*,5R*,9S*,10R*)- <b>3B</b> |         |         | (2R*,4S*,5R*,9S*,10R*)- <b>3C</b> |         |         | (2R*,4S*,5R*,9S*,10R*)- <b>3D</b> |         |         | (2R*,4S*,5R*,9S*,10R*)- <b>3E</b> |         |         |
|-----------------------------------|---------|---------|---------|-----------------------------------|---------|---------|-----------------------------------|---------|---------|-----------------------------------|---------|---------|-----------------------------------|---------|---------|
| C                                 | -2.5474 | -0.0415 | 1.7368  | -3.0848                           | -0.7996 | 0.2228  | -2.9689                           | -0.7562 | 0.3710  | -2.9868                           | -0.1167 | 0.8082  | -2.9598                           | -0.8698 | 0.3045  |
| C                                 | -2.3198 | -1.3761 | 2.4323  | -2.9761                           | -2.2397 | -0.2574 | -2.8941                           | -2.1813 | -0.1590 | -2.8894                           | -1.5722 | 0.3699  | -2.8187                           | -2.3173 | -0.1480 |
| C                                 | -0.8514 | -1.6108 | 2.8648  | -1.7116                           | -2.9728 | 0.2542  | -1.6358                           | -2.9548 | 0.3064  | -1.6290                           | -2.3011 | 0.9007  | -1.5449                           | -3.0177 | 0.3889  |
| C                                 | 0.0881  | -1.3701 | 1.6265  | -0.4477                           | -2.0958 | -0.0738 | -0.3607                           | -2.0881 | -0.0082 | -0.3587                           | -1.4375 | 0.5587  | -0.2944                           | -2.1168 | 0.0705  |
| C                                 | -0.1390 | -0.0335 | 0.7998  | -0.5134                           | -0.5605 | 0.3263  | -0.3931                           | -0.5658 | 0.4427  | -0.4157                           | 0.1059  | 0.9266  | -0.3967                           | -0.5794 | 0.4513  |
| C                                 | -1.6550 | 0.1045  | 0.5038  | -1.8586                           | 0.0185  | -0.1841 | -1.7346                           | 0.0530  | -0.0288 | -1.7517                           | 0.6833  | 0.3915  | -1.7426                           | -0.0328 | -0.0919 |
| C                                 | 1.5869  | -1.6127 | 1.9169  | 0.8918                            | -2.7389 | 0.3521  | 0.9726                            | -2.7686 | 0.3773  | 0.9771                            | -2.0800 | 0.9993  | 1.0519                            | -2.7276 | 0.5234  |
| C                                 | 2.4132  | -1.6394 | 0.6294  | 2.0888                            | -1.9876 | -0.2343 | 2.1750                            | -2.0197 | -0.2014 | 2.1809                            | -1.3467 | 0.4033  | 2.2426                            | -1.9590 | -0.0531 |
| C                                 | 2.1650  | -0.4045 | -0.2017 | 2.0144                            | -0.5142 | 0.0829  | 2.1311                            | -0.5559 | 0.1628  | 2.1133                            | 0.1317  | 0.6983  | 2.1338                            | -0.4846 | 0.2493  |
| C                                 | 0.6877  | -0.1857 | -0.5536 | 0.7166                            | 0.1537  | -0.3920 | 0.8391                            | 0.1490  | -0.2711 | 0.8239                            | 0.7964  | 0.2009  | 0.8317                            | 0.1522  | -0.2524 |
| C                                 | 0.6029  | 1.6028  | -4.0469 | 1.6932                            | 3.8677  | -1.2041 | 1.7832                            | 3.8785  | -1.0516 | 1.5238                            | 2.7177  | -2.2054 | 1.6591                            | 3.8814  | -1.1583 |
| C                                 | 0.8994  | 0.5260  | -3.0183 | 1.6406                            | 2.3570  | -1.3484 | 1.7979                            | 2.3645  | -1.1646 | 1.7970                            | 3.0244  | -0.7437 | 1.7403                            | 2.3659  | -1.2026 |
| C                                 | 0.4146  | 0.9196  | -1.6108 | 0.7042                            | 1.7053  | -0.3141 | 0.8545                            | 1.6976  | -0.1466 | 0.8172                            | 2.3512  | 0.2385  | 0.7862                            | 1.7041  | -0.1912 |
| C                                 | 0.3299  | 1.2521  | 1.5279  | -0.4211                           | -0.2956 | 1.8507  | -0.2737                           | -0.3521 | 1.9733  | -0.3323                           | 0.3988  | 2.4458  | -0.3377                           | -0.2988 | 1.9744  |
| C                                 | -0.4824 | -0.7552 | 4.0999  | -1.8394                           | -3.3426 | 1.7510  | -1.7504                           | -3.3699 | 1.7929  | -1.7681                           | -2.6362 | 2.4051  | -1.6920                           | -3.3732 | 1.8880  |
| C                                 | -0.7675 | -3.1020 | 3.3002  | -1.6405                           | -4.3075 | -0.5419 | -1.5964                           | -4.2581 | -0.5414 | -1.5588                           | -3.6520 | 0.1321  | -1.4300                           | -4.3578 | -0.3933 |
| C                                 | -0.3330 | 1.3880  | -4.9933 | 2.8291                            | 4.4602  | -0.7838 | 1.2254                            | 4.6196  | -2.0300 | 2.4226                            | 2.0099  | -2.9189 | 1.1191                            | 4.5560  | -2.1931 |
| C                                 | 3.1879  | 0.4051  | -0.5257 | 3.0117                            | 0.0792  | 0.7612  | 3.1477                            | -0.0022 | 0.8459  | 3.1051                            | 0.7276  | 1.3819  | 3.1067                            | 0.1336  | 0.9406  |
| C                                 | 1.4365  | 2.8511  | -3.9255 | 0.4305                            | 4.5947  | -1.5853 | 2.4454                            | 4.4350  | 0.1813  | 0.2343                            | 3.2732  | -2.7495 | 2.2398                            | 4.5180  | 0.0771  |
| O                                 | -3.9054 | 0.0334  | 1.3035  | -4.2308                           | -0.1933 | -0.3744 | -4.1129                           | -0.1135 | -0.1907 | -4.1388                           | 0.4810  | 0.2133  | -4.1217                           | -0.2974 | -0.2958 |
| O                                 | -1.3643 | -1.0293 | 5.1860  | -2.9970                           | -4.1435 | 1.9765  | -2.9241                           | -4.1414 | 2.0367  | -2.8919                           | -3.4832 | 2.6319  | -2.7953                           | -4.2523 | 2.0920  |
| C                                 | -0.7594 | 2.3483  | -6.0273 | 3.0243                            | 5.9030  | -0.5533 | 1.0979                            | 6.0882  | -2.0425 | 2.2753                            | 1.5865  | -4.3226 | 0.9334                            | 6.0162  | -2.2765 |
| O                                 | -0.4753 | 3.5236  | -6.1383 | 2.1983                            | 6.7927  | -0.5494 | 1.3260                            | 6.8800  | -1.1507 | 1.2869                            | 1.6238  | -5.0271 | 1.0888                            | 6.8541  | -1.4116 |
| O                                 | -1.5758 | 1.7343  | -6.9011 | 4.3243                            | 6.1471  | -0.3122 | 0.6525                            | 6.4900  | -3.2456 | 3.4444                            | 1.0979  | -4.7708 | 0.5257                            | 6.3467  | -3.5141 |
| H                                 | -2.3907 | 0.7889  | 2.4313  | -3.2355                           | -0.7626 | 1.3055  | -3.1026                           | -0.7511 | 1.4566  | -3.1383                           | -0.0574 | 1.8893  | -3.1232                           | -0.8259 | 1.3847  |
| H                                 | -3.0025 | -1.4616 | 3.2877  | -3.8882                           | -2.7849 | 0.0183  | -3.8117                           | -2.7191 | 0.1129  | -3.8063                           | -2.0998 | 0.6633  | -3.7241                           | -2.8725 | 0.1297  |
| H                                 | -2.6363 | -2.1774 | 1.7485  | -2.9816                           | -2.2358 | -1.3573 | -2.9166                           | -2.1399 | -1.2580 | -2.8942                           | -1.6027 | -0.7296 | -2.8108                           | -2.3361 | -1.2477 |
| H                                 | -0.1953 | -2.1737 | 0.9253  | -0.4165                           | -2.0871 | -1.1768 | -0.3436                           | -2.0424 | -1.1106 | -0.3250                           | -1.4517 | -0.5442 | -0.2463                           | -2.1195 | -1.0320 |



|   |         |         |         |         |         |         |         |         |         |         |         |         |         |         |         |
|---|---------|---------|---------|---------|---------|---------|---------|---------|---------|---------|---------|---------|---------|---------|---------|
| H | -1.9567 | -0.6437 | -0.2425 | -1.8351 | 0.1005  | -1.2798 | -1.7257 | 0.1693  | -1.1216 | -1.7181 | 0.7388  | -0.7055 | -1.6995 | 0.0348  | -1.1878 |
| H | -1.8780 | 1.0764  | 0.0461  | -2.0082 | 1.0425  | 0.1800  | -1.8596 | 1.0676  | 0.3695  | -1.8962 | 1.7167  | 0.7301  | -1.9185 | 0.9929  | 0.2554  |
| H | 1.7340  | -2.5735 | 2.4201  | 0.9531  | -3.7747 | 0.0037  | 1.0097  | -3.7935 | -0.0054 | 1.0333  | -3.1224 | 0.6704  | 1.1394  | -3.7659 | 0.1883  |
| H | 1.9809  | -0.8466 | 2.5935  | 0.9763  | -2.7750 | 1.4436  | 1.0713  | -2.8420 | 1.4658  | 1.0591  | -2.0957 | 2.0916  | 1.1211  | -2.7489 | 1.6164  |
| H | 3.4733  | -1.7459 | 0.8893  | 3.0130  | -2.4376 | 0.1478  | 3.0960  | -2.4976 | 0.1535  | 3.1013  | -1.7960 | 0.7953  | 3.1697  | -2.3869 | 0.3468  |
| H | 2.1488  | -2.5245 | 0.0372  | 2.1093  | -2.1153 | -1.3239 | 2.1788  | -2.1131 | -1.2947 | 2.2038  | -1.4917 | -0.6842 | 2.2817  | -2.0964 | -1.1411 |
| H | 0.3452  | -1.1198 | -1.0256 | 0.6297  | -0.0765 | -1.4654 | 0.7325  | -0.0472 | -1.3494 | 0.7361  | 0.5292  | -0.8619 | 0.7673  | -0.0909 | -1.3245 |
| H | 0.4139  | -0.4158 | -3.3060 | 1.3001  | 2.1086  | -2.3619 | 1.4973  | 2.0577  | -2.1750 | 2.8286  | 2.7622  | -0.4851 | 1.4919  | 2.0032  | -2.2087 |
| H | 1.9745  | 0.3186  | -3.0301 | 2.6498  | 1.9388  | -1.2684 | 2.8291  | 2.0157  | -1.0456 | 1.7365  | 4.1117  | -0.6037 | 2.7796  | 2.0673  | -1.0300 |
| H | 0.8648  | 1.8701  | -1.3041 | 0.9591  | 2.0511  | 0.6942  | 1.1157  | 2.0029  | 0.8725  | 1.0388  | 2.7128  | 1.2491  | 0.9997  | 2.0588  | 0.8230  |
| H | -0.6613 | 1.1047  | -1.6898 | -0.3040 | 2.0781  | -0.5168 | -0.1462 | 2.0985  | -0.3366 | -0.1818 | 2.7302  | 0.0036  | -0.2211 | 2.0586  | -0.4315 |
| H | 1.3453  | 1.1704  | 1.9239  | -1.3269 | -0.5750 | 2.3878  | -1.1768 | -0.6312 | 2.5151  | -1.2390 | 0.1248  | 2.9837  | -1.2397 | -0.6080 | 2.5007  |
| H | 0.3170  | 2.1136  | 0.8518  | 0.4142  | -0.8181 | 2.3236  | 0.5582  | -0.9054 | 2.4165  | 0.5023  | -0.1126 | 2.9321  | 0.5089  | -0.7868 | 2.4640  |
| H | -0.3209 | 1.5357  | 2.3543  | -0.2903 | 0.7721  | 2.0566  | -0.1193 | 0.7057  | 2.2116  | -0.2060 | 1.4705  | 2.6329  | -0.2488 | 0.7747  | 2.1727  |
| H | -0.5536 | 0.3122  | 3.9091  | -1.9397 | -2.4713 | 2.3927  | -1.8204 | -2.5133 | 2.4573  | -1.9200 | -1.7517 | 3.0186  | -1.8745 | -2.4999 | 2.5094  |
| H | 0.5354  | -0.9736 | 4.4390  | -0.9707 | -3.9167 | 2.0893  | -0.8884 | -3.9628 | 2.1162  | -0.8832 | -3.1626 | 2.7757  | -0.7976 | -3.8801 | 2.2632  |
| H | 0.1931  | -3.3368 | 3.7696  | -0.8664 | -4.9754 | -0.1508 | -0.8418 | -4.9607 | -0.1736 | -0.7955 | -4.3179 | 0.5473  | -0.6538 | -5.0076 | 0.0233  |
| H | -1.5490 | -3.3513 | 4.0276  | -2.5897 | -4.8540 | -0.4930 | -2.5602 | -4.7799 | -0.5208 | -2.5131 | -4.1897 | 0.1779  | -2.3700 | -4.9212 | -0.3642 |
| H | -0.8973 | -3.7747 | 2.4449  | -1.4261 | -4.1285 | -1.6016 | -1.3721 | -4.0435 | -1.5925 | -1.3289 | -3.4961 | -0.9280 | -1.1926 | -4.1841 | -1.4490 |
| H | -0.8692 | 0.4436  | -5.0212 | 3.7032  | 3.8560  | -0.5577 | 0.7922  | 4.1325  | -2.8990 | 3.3416  | 1.6703  | -2.4490 | 0.7486  | 4.0150  | -3.0592 |
| H | 3.0590  | 1.3212  | -1.0908 | 2.9918  | 1.1259  | 1.0429  | 3.1500  | 1.0347  | 1.1625  | 3.0857  | 1.7761  | 1.6560  | 3.0613  | 1.1813  | 1.2154  |
| H | 4.2057  | 0.1789  | -0.2192 | 3.8914  | -0.4774 | 1.0731  | 4.0217  | -0.5834 | 1.1276  | 3.9774  | 0.1694  | 1.7114  | 3.9917  | -0.4030 | 1.2723  |
| H | 2.4535  | 2.6006  | -3.6038 | 0.6069  | 5.6267  | -1.8957 | 2.8222  | 5.4507  | 0.0436  | 0.2545  | 3.4224  | -3.8312 | 2.5850  | 5.5405  | -0.0902 |
| H | 1.5459  | 3.3866  | -4.8710 | -0.0491 | 4.1028  | -2.4389 | 1.7475  | 4.4289  | 1.0240  | -0.6002 | 2.6103  | -2.5010 | 1.5025  | 4.5221  | 0.8857  |
| H | 1.0016  | 3.5288  | -3.1846 | -0.2760 | 4.5941  | -0.7496 | 3.3154  | 3.8272  | 0.4540  | 0.0306  | 4.2578  | -2.3143 | 3.1174  | 3.9576  | 0.4181  |
| H | -4.4669 | -0.0847 | 2.0894  | -5.0032 | -0.7337 | -0.1327 | -4.8956 | -0.6126 | 0.1019  | -4.0744 | 0.3660  | -0.7504 | -4.0495 | -0.4064 | -1.2592 |
| H | -1.0443 | -0.5191 | 5.9502  | -2.9883 | -4.4014 | 2.9146  | -2.7561 | -5.0444 | 1.7172  | -2.9374 | -3.6513 | 3.5888  | -2.8484 | -4.4309 | 3.0467  |
| H | -1.8066 | 2.4445  | -7.5352 | 4.3509  | 7.1165  | -0.1726 | 0.5953  | 7.4637  | -3.1536 | 3.2473  | 0.8463  | -5.6969 | 0.4272  | 7.3205  | -3.4689 |

| (2 <i>R</i> *,4 <i>S</i> *,5 <i>R</i> *,9 <i>S</i> *,10 <i>R</i> *)-3 <b>F</b> |         |         |         |
|--------------------------------------------------------------------------------|---------|---------|---------|
| C                                                                              | -3.1030 | -0.7885 | 0.2104  |
| C                                                                              | -3.0106 | -2.2323 | -0.2615 |
| C                                                                              | -1.7534 | -2.9797 | 0.2495  |
| C                                                                              | -0.4798 | -2.1160 | -0.0786 |
| C                                                                              | -0.5285 | -0.5809 | 0.3218  |
| C                                                                              | -1.8649 | 0.0140  | -0.1930 |
| C                                                                              | 0.8530  | -2.7742 | 0.3467  |
| C                                                                              | 2.0588  | -2.0357 | -0.2373 |
| C                                                                              | 2.0001  | -0.5625 | 0.0846  |
| C                                                                              | 0.7117  | 0.1201  | -0.3925 |
| C                                                                              | 1.7224  | 3.8255  | -1.2015 |
| C                                                                              | 1.6668  | 2.3145  | -1.3404 |
| C                                                                              | 0.7165  | 1.6717  | -0.3133 |
| C                                                                              | -0.4385 | -0.3196 | 1.8467  |
| C                                                                              | -1.8861 | -3.3471 | 1.7470  |
| C                                                                              | -1.6945 | -4.3144 | -0.5477 |
| C                                                                              | 2.8520  | 4.4159  | -0.7619 |
| C                                                                              | 3.0015  | 0.0174  | 0.7687  |
| C                                                                              | 0.4708  | 4.5563  | -1.6108 |
| O                                                                              | -4.2492 | -0.1949 | -0.3994 |
| O                                                                              | -3.0206 | -4.1809 | 1.9672  |
| C                                                                              | 3.0452  | 5.8591  | -0.5324 |
| O                                                                              | 2.2176  | 6.7475  | -0.5366 |
| O                                                                              | 4.3428  | 6.1041  | -0.2808 |
| H                                                                              | -3.2643 | -0.7539 | 1.2919  |
| H                                                                              | -3.9288 | -2.7642 | 0.0204  |
| H                                                                              | -3.0189 | -2.2349 | -1.3616 |
| H                                                                              | -0.4484 | -2.1071 | -1.1816 |
| H                                                                              | -1.8376 | 0.0951  | -1.2886 |

| (2 <i>R</i> *,4 <i>S</i> *,5 <i>R</i> *,9 <i>S</i> *,10 <i>R</i> *)-3 <b>G</b> |         |         |
|--------------------------------------------------------------------------------|---------|---------|
| -2.5212                                                                        | 0.7270  | 1.6165  |
| -2.2666                                                                        | -0.6009 | 2.3164  |
| -0.7926                                                                        | -0.8022 | 2.7464  |
| 0.1323                                                                         | -0.5530 | 1.4961  |
| -0.1212                                                                        | 0.7767  | 0.6650  |
| -1.6414                                                                        | 0.8888  | 0.3764  |
| 1.6378                                                                         | -0.7760 | 1.7699  |
| 2.4507                                                                         | -0.7969 | 0.4735  |
| 2.1798                                                                         | 0.4355  | -0.3545 |
| 0.6975                                                                         | 0.6314  | -0.6946 |
| 0.2695                                                                         | 0.1607  | -3.7886 |
| 0.8961                                                                         | 1.4016  | -3.1780 |
| 0.3961                                                                         | 1.7274  | -1.7561 |
| 0.3333                                                                         | 2.0703  | 1.3866  |
| -0.4297                                                                        | 0.0731  | 3.9714  |
| -0.6747                                                                        | -2.2879 | 3.1913  |
| 1.0368                                                                         | -0.9176 | -4.0468 |
| 3.1885                                                                         | 1.2617  | -0.6802 |
| -1.2040                                                                        | 0.2609  | -4.0818 |
| -3.8921                                                                        | 0.7917  | 1.2282  |
| -1.2106                                                                        | -0.2625 | 5.1159  |
| 0.5656                                                                         | -2.2077 | -4.5801 |
| -0.5748                                                                        | -2.6074 | -4.7010 |
| 1.6206                                                                         | -2.9632 | -4.9298 |
| -2.3644                                                                        | 1.5558  | 2.3121  |
| -2.9500                                                                        | -0.7001 | 3.1689  |
| -2.5636                                                                        | -1.4117 | 1.6348  |
| -0.1475                                                                        | -1.3636 | 0.8016  |
| -1.9333                                                                        | 0.1345  | -0.3675 |

| (2 <i>R</i> *,4 <i>S</i> *,5 <i>R</i> *,9 <i>S</i> *,10 <i>R</i> *)-3 <b>H</b> |         |         |
|--------------------------------------------------------------------------------|---------|---------|
| -2.5226                                                                        | 0.7261  | 1.6335  |
| -2.2709                                                                        | -0.6041 | 2.3301  |
| -0.7961                                                                        | -0.8191 | 2.7510  |
| 0.1204                                                                         | -0.5790 | 1.4925  |
| -0.1286                                                                        | 0.7525  | 0.6641  |
| -1.6497                                                                        | 0.8774  | 0.3869  |
| 1.6265                                                                         | -0.8170 | 1.7526  |
| 2.4290                                                                         | -0.8412 | 0.4498  |
| 2.1620                                                                         | 0.3972  | -0.3703 |
| 0.6792                                                                         | 0.6017  | -0.7017 |
| 0.2757                                                                         | 0.1320  | -3.7982 |
| 0.8820                                                                         | 1.3808  | -3.1837 |
| 0.3771                                                                         | 1.6988  | -1.7617 |
| 0.3413                                                                         | 2.0409  | 1.3853  |
| -0.4183                                                                        | 0.0575  | 3.9713  |
| -0.6863                                                                        | -2.3049 | 3.1960  |
| 1.0610                                                                         | -0.9332 | -4.0570 |
| 3.1732                                                                         | 1.2208  | -0.6949 |
| -1.1987                                                                        | 0.2101  | -4.0929 |
| -3.8962                                                                        | 0.7665  | 1.2516  |
| -1.1518                                                                        | -0.2986 | 5.1407  |
| 0.6169                                                                         | -2.2290 | -4.6006 |
| -0.5149                                                                        | -2.6351 | -4.7686 |
| 1.6890                                                                         | -2.9818 | -4.9019 |
| -2.3655                                                                        | 1.5550  | 2.3295  |
| -2.9499                                                                        | -0.7007 | 3.1864  |
| -2.5794                                                                        | -1.4110 | 1.6487  |
| -0.1730                                                                        | -1.3870 | 0.8004  |
| -1.9565                                                                        | 0.1249  | -0.3528 |

| (2 <i>R</i> *,4 <i>S</i> *,5 <i>R</i> *,9 <i>S</i> *,10 <i>R</i> *)-3 <b>I</b> |         |         |
|--------------------------------------------------------------------------------|---------|---------|
| -2.5637                                                                        | -0.0391 | 1.7159  |
| -2.3539                                                                        | -1.3769 | 2.4109  |
| -0.8891                                                                        | -1.6305 | 2.8448  |
| 0.0548                                                                         | -1.4012 | 1.6076  |
| -0.1546                                                                        | -0.0616 | 0.7811  |
| -1.6684                                                                        | 0.0959  | 0.4836  |
| 1.5501                                                                         | -1.6627 | 1.8996  |
| 2.3778                                                                         | -1.6986 | 0.6131  |
| 2.1456                                                                         | -0.4602 | -0.2175 |
| 0.6715                                                                         | -0.2241 | -0.5715 |
| 0.6085                                                                         | 1.5630  | -4.0655 |
| 0.8969                                                                         | 0.4848  | -3.0359 |
| 0.4124                                                                         | 0.8835  | -1.6297 |
| 0.3298                                                                         | 1.2178  | 1.5100  |
| -0.5104                                                                        | -0.7802 | 4.0806  |
| -0.8247                                                                        | -3.1228 | 3.2797  |
| -0.3113                                                                        | 1.3443  | -5.0273 |
| 3.1784                                                                         | 0.3378  | -0.5390 |
| 1.4433                                                                         | 2.8093  | -3.9380 |
| -3.9202                                                                        | 0.0541  | 1.2816  |
| -1.3974                                                                        | -1.0426 | 5.1654  |
| -0.7656                                                                        | 2.2532  | -6.0917 |
| -1.2847                                                                        | 1.8835  | -7.1303 |
| -0.6359                                                                        | 3.5539  | -5.7993 |
| -2.3967                                                                        | 0.7887  | 2.4110  |
| -3.0386                                                                        | -1.4542 | 3.2655  |
| -2.6799                                                                        | -2.1737 | 1.7262  |
| -0.2379                                                                        | -2.2010 | 0.9059  |
| -1.9790                                                                        | -0.6484 | -0.2630 |

| (2 <i>R</i> *,4 <i>S</i> *,5 <i>R</i> *,9 <i>S</i> *,10 <i>R</i> *)-3 <b>J</b> |         |         |
|--------------------------------------------------------------------------------|---------|---------|
| -3.0103                                                                        | -0.1336 | 0.7650  |
| -2.9007                                                                        | -1.5892 | 0.3324  |
| -1.6578                                                                        | -2.3161 | 0.9038  |
| -0.3769                                                                        | -1.4551 | 0.5755  |
| -0.4413                                                                        | 0.0941  | 0.9230  |
| -1.7719                                                                        | 0.6674  | 0.3675  |
| 0.9657                                                                         | -2.0795 | 1.0203  |
| 2.1602                                                                         | -1.3514 | 0.4012  |
| 2.0934                                                                         | 0.1283  | 0.6908  |
| 0.7999                                                                         | 0.7879  | 0.2001  |
| 1.4605                                                                         | 2.7296  | -2.2064 |
| 1.7595                                                                         | 3.0205  | -0.7464 |
| 0.7908                                                                         | 2.3429  | 0.2437  |
| -0.3729                                                                        | 0.3966  | 2.4401  |
| -1.9012                                                                        | -2.6404 | 2.3984  |
| -1.5674                                                                        | -3.6767 | 0.1562  |
| 2.3404                                                                         | 2.0181  | -2.9397 |
| 3.0899                                                                         | 0.7267  | 1.3655  |
| 0.1695                                                                         | 3.3038  | -2.7263 |
| -4.1591                                                                        | 0.4477  | 0.1497  |
| -0.8293                                                                        | -3.3754 | 2.9675  |
| 2.1655                                                                         | 1.6079  | -4.3440 |
| 1.1644                                                                         | 1.6566  | -5.0297 |
| 3.3238                                                                         | 1.1182  | -4.8181 |
| -3.1794                                                                        | -0.0697 | 1.8433  |
| -3.8220                                                                        | -2.1193 | 0.6096  |
| -2.8792                                                                        | -1.6250 | -0.7665 |
| -0.3355                                                                        | -1.4783 | -0.5273 |
| -1.7214                                                                        | 0.7217  | -0.7289 |

|   |         |         |         |         |         |         |         |         |         |         |         |         |         |         |         |
|---|---------|---------|---------|---------|---------|---------|---------|---------|---------|---------|---------|---------|---------|---------|---------|
| H | -2.0015 | 1.0399  | 0.1705  | -1.8848 | 1.8562  | -0.0799 | -1.8847 | 1.8466  | -0.0701 | -1.8785 | 1.0706  | 0.0259  | -1.9252 | 1.7007  | 0.7023  |
| H | 0.9029  | -3.8103 | -0.0030 | 1.8026  | -1.7329 | 2.2750  | 1.7863  | -1.7768 | 2.2539  | 1.6846  | -2.6257 | 2.4022  | 1.0280  | -3.1288 | 0.7162  |
| H | 0.9372  | -2.8123 | 1.4382  | 2.0305  | -0.0020 | 2.4381  | 2.0325  | -0.0483 | 2.4190  | 1.9527  | -0.9021 | 2.5773  | 1.0634  | -2.0614 | 2.1103  |
| H | 2.9777  | -2.4969 | 0.1442  | 3.5146  | -0.8918 | 0.7220  | 3.4940  | -0.9463 | 0.6893  | 3.4362  | -1.8181 | 0.8743  | 3.0864  | -1.7968 | 0.7839  |
| H | 2.0786  | -2.1605 | -1.3272 | 2.1893  | -1.6852 | -0.1152 | 2.1552  | -1.7250 | -0.1402 | 2.1035  | -2.5802 | 0.0200  | 2.1689  | -1.5032 | -0.6855 |
| H | 0.6249  | -0.1078 | -1.4664 | 0.3632  | -0.3136 | -1.1461 | 0.3358  | -0.3410 | -1.1512 | 0.3186  | -1.1543 | -1.0434 | 0.7115  | 0.5229  | -0.8633 |
| H | 1.3370  | 2.0627  | -2.3566 | 1.9883  | 1.3200  | -3.1836 | 1.9753  | 1.3164  | -3.1893 | 0.4059  | -0.4544 | -3.3229 | 2.7935  | 2.7500  | -0.5073 |
| H | 2.6737  | 1.8935  | -1.2471 | 0.6711  | 2.2562  | -3.8297 | 0.6451  | 2.2331  | -3.8343 | 1.9708  | 0.2711  | -3.0457 | 1.7073  | 4.1068  | -0.5949 |
| H | 0.9688  | 2.0135  | 0.6971  | 0.8264  | 2.6880  | -1.4505 | 0.8023  | 2.6604  | -1.4522 | 0.8713  | 1.8296  | -1.3224 | 1.0223  | 2.6999  | 1.2539  |
| H | -0.2861 | 2.0556  | -0.5221 | -0.6821 | 1.8984  | -1.8272 | -0.7019 | 1.8643  | -1.8353 | -0.6615 | 1.0791  | -1.7114 | -0.2105 | 2.7229  | 0.0216  |
| H | -1.3475 | -0.5948 | 2.3806  | 1.3561  | 2.0079  | 1.7668  | 1.3670  | 1.9704  | 1.7563  | 1.3433  | 1.1230  | 1.9077  | -1.2680 | 0.0854  | 2.9765  |
| H | 0.3920  | -0.8489 | 2.3206  | 0.2930  | 2.9317  | 0.7114  | 0.3007  | 2.9046  | 0.7131  | 0.3290  | 2.0794  | 0.8339  | 0.4811  | -0.0785 | 2.9295  |
| H | -0.3010 | 0.7468  | 2.0550  | -0.3091 | 2.3396  | 2.2241  | -0.2912 | 2.3114  | 2.2298  | -0.3185 | 1.5097  | 2.3355  | -0.2898 | 1.4735  | 2.6221  |
| H | -2.0179 | -2.4747 | 2.3820  | -0.5723 | 1.1372  | 3.7981  | -0.5953 | 1.1181  | 3.8072  | -0.5669 | 0.2881  | 3.8899  | -2.8045 | -3.2540 | 2.5033  |
| H | -1.0058 | -3.8951 | 2.0972  | 0.6164  | -0.0741 | 4.2562  | 0.6393  | -0.0630 | 4.2234  | 0.5039  | -1.0124 | 4.4211  | -2.0628 | -1.7507 | 3.0038  |
| H | -0.9315 | -4.9923 | -0.1522 | 0.2911  | -2.4968 | 3.6625  | 0.2803  | -2.5195 | 3.6630  | 0.1325  | -3.3701 | 3.7496  | -0.7766 | -4.3205 | 0.5525  |
| H | -2.6510 | -4.8486 | -0.5061 | -1.4509 | -2.5503 | 3.9198  | -1.4612 | -2.5622 | 3.9276  | -1.6098 | -3.3623 | 4.0064  | -2.5075 | -4.2343 | 0.2451  |
| H | -1.4713 | -4.1371 | -1.6059 | -0.7886 | -2.9693 | 2.3406  | -0.8083 | -2.9860 | 2.3462  | -0.9624 | -3.7935 | 2.4240  | -1.3747 | -3.5318 | -0.9129 |
| H | 3.7204  | 3.8106  | -0.5173 | 2.1008  | -0.8917 | -3.8274 | 2.1230  | -0.8906 | -3.8306 | -0.8168 | 0.3834  | -5.0807 | 3.2627  | 1.6641  | -2.4869 |
| H | 2.9926  | 1.0632  | 1.0543  | 3.0431  | 2.1804  | -1.2365 | 3.0296  | 2.1440  | -1.2442 | 3.0608  | 1.2558  | -1.1033 | 3.0726  | 1.7754  | 1.6377  |
| H | 3.8736  | -0.5505 | 1.0816  | 4.2107  | 1.0498  | -0.3778 | 4.1956  | 1.0016  | -0.3983 | 4.1929  | 0.0993  | -0.2310 | 3.9629  | 0.1678  | 1.6921  |
| H | 0.6594  | 5.5843  | -1.9280 | -1.4557 | 1.2699  | -4.4267 | -1.4649 | 1.2155  | -4.4377 | 2.4441  | 2.5640  | -3.5654 | 0.1763  | 3.4643  | -3.8066 |
| H | 0.0025  | 4.0595  | -2.4679 | -1.5301 | -0.4163 | -4.8742 | -1.5150 | -0.4713 | -4.8855 | 1.5975  | 3.3126  | -4.8962 | -0.6682 | 2.6467  | -2.4732 |
| H | -0.2497 | 4.5679  | -0.7873 | -1.7865 | 0.0530  | -3.1789 | -1.7786 | -0.0061 | -3.1904 | 0.9807  | 3.5093  | -3.2357 | -0.0183 | 4.2858  | -2.2780 |
| H | -4.3407 | 0.7042  | -0.0408 | -4.0649 | 0.0670  | 0.6023  | -4.0517 | 1.6067  | 0.7869  | -4.4842 | -0.0616 | 2.0661  | -4.0331 | 0.4179  | -0.8146 |
| H | -3.0386 | -4.4002 | 2.9144  | -2.1003 | 0.1096  | 4.9912  | -2.0806 | -0.0467 | 5.0045  | -1.0711 | -0.5380 | 5.9306  | -1.0640 | -3.5562 | 3.8940  |
| H | 4.3694  | 7.0738  | -0.1433 | 1.2117  | -3.7874 | -5.2664 | 1.2963  | -3.8105 | -5.2467 | -1.0157 | 4.0056  | -6.5802 | 3.1089  | 0.8741  | -5.7421 |

| (2R*,4S*,5R*,9S*,10R*)-3K |         |         |         |
|---------------------------|---------|---------|---------|
| C                         | -2.8813 | -0.8871 | -0.7626 |
| C                         | -3.1232 | -0.8220 | 0.7399  |
| C                         | -2.5623 | 0.4575  | 1.4106  |
| C                         | -1.0562 | 0.6359  | 0.9886  |
| C                         | -0.7199 | 0.5142  | -0.5585 |
| C                         | -1.3942 | -0.7719 | -1.1019 |
| C                         | -0.3648 | 1.8623  | 1.6284  |
| C                         | 1.1503  | 1.8332  | 1.4142  |
| C                         | 1.4865  | 1.6618  | -0.0468 |
| C                         | 0.8661  | 0.4079  | -0.6748 |
| C                         | 3.1684  | -1.6513 | -1.3200 |
| C                         | 2.8683  | -0.4060 | -2.1352 |
| C                         | 1.3926  | 0.0396  | -2.0911 |
| C                         | -1.2041 | 1.7145  | -1.4106 |
| C                         | -3.4434 | 1.6903  | 1.0929  |
| C                         | -2.6403 | 0.2069  | 2.9437  |
| C                         | 3.9775  | -1.5671 | -0.2447 |
| C                         | 2.2226  | 2.5900  | -0.6815 |
| C                         | 2.5276  | -2.9185 | -1.8208 |
| O                         | -3.3670 | -2.1330 | -1.2637 |
| O                         | -4.7909 | 1.5053  | 1.5178  |
| C                         | 4.3151  | -2.6685 | 0.6738  |
| O                         | 3.8047  | -3.7669 | 0.7617  |
| O                         | 5.3192  | -2.2890 | 1.4827  |
| H                         | -3.4560 | -0.1087 | -1.2719 |
| H                         | -4.1970 | -0.9350 | 0.9382  |
| H                         | -2.6637 | -1.7083 | 1.2014  |
| H                         | -0.5548 | -0.2359 | 1.4429  |
| H                         | -0.8715 | -1.6565 | -0.7120 |

| (2R*,4S*,5R*,9S*,10R*)-3L |         |         |
|---------------------------|---------|---------|
| -2.5447                   | -0.0646 | 1.7544  |
| -2.3128                   | -1.4034 | 2.4411  |
| -0.8473                   | -1.6241 | 2.8896  |
| 0.0991                    | -1.3673 | 1.6569  |
| -0.1313                   | -0.0268 | 0.8370  |
| -1.6462                   | 0.1025  | 0.5283  |
| 1.5982                    | -1.6030 | 1.9534  |
| 2.4319                    | -1.6164 | 0.6706  |
| 2.1823                    | -0.3757 | -0.1514 |
| 0.7071                    | -0.1619 | -0.5115 |
| 0.6263                    | 1.6551  | -3.9906 |
| 0.9378                    | 0.5777  | -2.9671 |
| 0.4347                    | 0.9514  | -1.5604 |
| 0.3230                    | 1.2550  | 1.5803  |
| -0.4949                   | -0.7690 | 4.1319  |
| -0.7498                   | -3.1166 | 3.3164  |
| -0.2862                   | 1.4220  | -4.9553 |
| 3.2028                    | 0.4433  | -0.4590 |
| 1.4205                    | 2.9264  | -3.8441 |
| -3.9095                   | 0.0182  | 1.3487  |
| -1.3012                   | -1.1094 | 5.2572  |
| -0.7232                   | 2.3799  | -5.9874 |
| -0.4715                   | 3.5638  | -6.0826 |
| -1.5087                   | 1.7513  | -6.8790 |
| -2.3892                   | 0.7541  | 2.4621  |
| -3.0093                   | -1.5066 | 3.2825  |
| -2.6075                   | -2.2028 | 1.7452  |
| -0.1748                   | -2.1678 | 0.9484  |
| -1.9343                   | -0.6406 | -0.2281 |

| (2R*,4S*,5R*,9S*,10R*)-3M |         |         |
|---------------------------|---------|---------|
| -2.4845                   | 0.7873  | 1.6548  |
| -2.2833                   | -0.5750 | 2.3054  |
| -0.8146                   | -0.8681 | 2.7012  |
| 0.1033                    | -0.6197 | 1.4462  |
| -0.0957                   | 0.7513  | 0.6705  |
| -1.6114                   | 0.9476  | 0.4103  |
| 1.6000                    | -0.9277 | 1.6867  |
| 2.3951                    | -0.9331 | 0.3789  |
| 2.1722                    | 0.3446  | -0.3925 |
| 0.6965                    | 0.6180  | -0.7060 |
| 0.2799                    | 0.2611  | -3.8107 |
| 0.9166                    | 1.4766  | -3.1608 |
| 0.4292                    | 1.7611  | -1.7257 |
| 0.4304                    | 1.9926  | 1.4343  |
| -0.3863                   | -0.0601 | 3.9510  |
| -0.7670                   | -2.3738 | 3.0883  |
| 1.0425                    | -0.8081 | -4.1165 |
| 3.2120                    | 1.1411  | -0.6930 |
| -1.1966                   | 0.3765  | -4.0821 |
| -3.8464                   | 0.9173  | 1.2499  |
| -1.1604                   | -0.4022 | 5.0984  |
| 0.5696                    | -2.0762 | -4.6995 |
| -0.5705                   | -2.4596 | -4.8650 |
| 1.6251                    | -2.8339 | -5.0445 |
| -2.2904                   | 1.5900  | 2.3719  |
| -2.9535                   | -0.6699 | 3.1690  |
| -2.6357                   | -1.3443 | 1.6023  |
| -0.2270                   | -1.3887 | 0.7269  |
| -1.9517                   | 0.2353  | -0.3543 |

| (2R*,4S*,5R*,9S*,10R*)-3N |         |         |
|---------------------------|---------|---------|
| -2.7758                   | 0.9694  | 0.8485  |
| -2.5831                   | -0.0207 | 1.9887  |
| -1.1919                   | 0.0681  | 2.6638  |
| -0.0813                   | -0.0136 | 1.5523  |
| -0.2543                   | 0.9333  | 0.2888  |
| -1.7081                   | 0.7904  | -0.2314 |
| 1.3637                    | 0.0252  | 2.1013  |
| 2.3884                    | -0.3333 | 1.0220  |
| 2.1986                    | 0.5180  | -0.2096 |
| 0.7879                    | 0.4264  | -0.8048 |
| 0.9683                    | -1.1074 | -3.5526 |
| 1.3776                    | 0.3399  | -3.3449 |
| 0.6134                    | 1.0587  | -2.2148 |
| 0.0118                    | 2.4331  | 0.5754  |
| -1.0805                   | 1.3268  | 3.5571  |
| -1.0860                   | -1.1752 | 3.5920  |
| 1.8589                    | -2.0931 | -3.3189 |
| 3.2009                    | 1.2962  | -0.6520 |
| -0.4364                   | -1.3124 | -4.0532 |
| -4.0495                   | 0.7410  | 0.2457  |
| -2.1134                   | 1.3713  | 4.5386  |
| 1.6667                    | -3.5486 | -3.4102 |
| 2.5705                    | -4.3489 | -3.5757 |
| 0.4044                    | -3.9502 | -3.2121 |
| -2.7823                   | 1.9970  | 1.2230  |
| -3.3879                   | 0.1097  | 2.7238  |
| -2.7369                   | -1.0350 | 1.5917  |
| -0.1980                   | -1.0323 | 1.1443  |
| -1.8396                   | -0.1951 | -0.6997 |

|   |         |         |         |
|---|---------|---------|---------|
| H | -1.2971 | -0.8350 | -2.1928 |
| H | -0.5427 | 1.8882  | 2.7081  |
| H | -0.7760 | 2.7942  | 1.2253  |
| H | 1.5857  | 2.7521  | 1.8248  |
| H | 1.5899  | 1.0021  | 1.9800  |
| H | 1.1585  | -0.4310 | -0.0273 |
| H | 3.5194  | 0.4186  | -1.8260 |
| H | 3.1394  | -0.6060 | -3.1802 |
| H | 1.2661  | 0.8822  | -2.7804 |
| H | 0.7994  | -0.7769 | -2.5134 |
| H | -0.9112 | 2.6798  | -0.9900 |
| H | -0.7937 | 1.6675  | -2.4248 |
| H | -2.2848 | 1.7328  | -1.5467 |
| H | -3.4979 | 1.8945  | 0.0270  |
| H | -3.0648 | 2.5950  | 1.5795  |
| H | -2.4345 | 1.1171  | 3.5160  |
| H | -3.6343 | -0.1452 | 3.2432  |
| H | -1.9227 | -0.5588 | 3.2599  |
| H | 4.4194  | -0.6126 | 0.0281  |
| H | 2.4555  | 2.5363  | -1.7387 |
| H | 2.6070  | 3.4607  | -0.1570 |
| H | 1.4944  | -2.9879 | -1.4669 |
| H | 2.5158  | -2.9316 | -2.9164 |
| H | 3.0645  | -3.8196 | -1.5164 |
| H | -2.9151 | -2.8487 | -0.7851 |
| H | -4.8181 | 1.6151  | 2.4832  |
| H | 5.4695  | -3.0762 | 2.0461  |

|         |         |         |
|---------|---------|---------|
| -1.8742 | 1.0773  | 0.0797  |
| 1.7483  | -2.5660 | 2.4516  |
| 1.9848  | -0.8384 | 2.6359  |
| 3.4910  | -1.7201 | 0.9357  |
| 2.1749  | -2.4980 | 0.0699  |
| 0.3735  | -1.0935 | -0.9944 |
| 0.4742  | -0.3720 | -3.2648 |
| 2.0172  | 0.3935  | -2.9724 |
| 0.8729  | 1.9028  | -1.2392 |
| -0.6421 | 1.1270  | -1.6482 |
| 1.3413  | 1.1820  | 1.9705  |
| 0.2949  | 2.1252  | 0.9157  |
| -0.3266 | 1.5173  | 2.4143  |
| -0.6200 | 0.2992  | 3.9699  |
| 0.5438  | -0.9339 | 4.4337  |
| 0.2071  | -3.3411 | 3.7983  |
| -1.5387 | -3.3811 | 4.0302  |
| -0.8580 | -3.7857 | 2.4552  |
| -0.7923 | 0.4621  | -5.0031 |
| 3.0734  | 1.3652  | -1.0145 |
| 4.2193  | 0.2205  | -0.1455 |
| 2.4376  | 2.7034  | -3.5031 |
| 1.5335  | 3.4711  | -4.7840 |
| 0.9509  | 3.5861  | -3.1081 |
| -4.0825 | -0.6974 | 0.7130  |
| -2.1788 | -0.7107 | 5.1284  |
| -1.7468 | 2.4601  | -7.5122 |

|         |         |         |
|---------|---------|---------|
| -1.8109 | 1.9412  | -0.0102 |
| 1.7235  | -1.9120 | 2.1493  |
| 2.0395  | -0.2026 | 2.3802  |
| 3.4564  | -1.0877 | 0.6078  |
| 2.0847  | -1.7828 | -0.2421 |
| 0.3142  | -0.2947 | -1.1852 |
| 2.0082  | 1.3891  | -3.1761 |
| 0.6942  | 2.3541  | -3.7824 |
| 0.8884  | 2.6962  | -1.3852 |
| -0.6439 | 1.9657  | -1.7881 |
| 1.4509  | 1.8634  | 1.8038  |
| 0.4306  | 2.8790  | 0.7912  |
| -0.1920 | 2.2638  | 2.2862  |
| -0.4802 | 1.0157  | 3.8210  |
| 0.6564  | -0.2685 | 4.2088  |
| 0.1942  | -2.6499 | 3.5335  |
| -1.5439 | -2.6236 | 3.8204  |
| -0.9301 | -3.0154 | 2.2149  |
| 2.1077  | -0.7915 | -3.9025 |
| 3.0992  | 2.0892  | -1.2059 |
| 4.2270  | 0.8730  | -0.4122 |
| -1.4467 | 1.3958  | -4.3965 |
| -1.5379 | -0.2774 | -4.8873 |
| -1.7684 | 0.1478  | -3.1775 |
| -4.4080 | 0.7780  | 2.0312  |
| -2.0237 | 0.0363  | 5.0217  |
| 1.2133  | -3.6423 | -5.4141 |

|         |         |         |
|---------|---------|---------|
| -1.9130 | 1.5186  | -1.0261 |
| 1.4863  | -0.6906 | 2.9203  |
| 1.5947  | 1.0120  | 2.5168  |
| 3.3970  | -0.2235 | 1.4384  |
| 2.2811  | -1.3893 | 0.7439  |
| 0.5848  | -0.6456 | -0.9396 |
| 2.4569  | 0.4108  | -3.1725 |
| 1.2036  | 0.8844  | -4.2824 |
| 0.9205  | 2.1108  | -2.2063 |
| -0.4439 | 1.0627  | -2.4966 |
| 0.9480  | 2.6040  | 1.1126  |
| 0.0655  | 3.0078  | -0.3553 |
| -0.7844 | 2.9058  | 1.1496  |
| -1.1776 | 2.2474  | 2.9885  |
| -0.1202 | 1.3684  | 4.0815  |
| -0.2110 | -1.1207 | 4.2476  |
| -1.9670 | -1.2709 | 4.2372  |
| -1.0138 | -2.1017 | 3.0111  |
| 2.8734  | -1.8414 | -3.0197 |
| 3.1010  | 1.9574  | -1.5050 |
| 4.1664  | 1.3102  | -0.1535 |
| -0.7226 | -0.5015 | -4.7322 |
| -0.5493 | -2.2358 | -4.6273 |
| -1.1421 | -1.3224 | -3.2170 |
| -4.7227 | 0.8821  | 0.9343  |
| -1.8758 | 0.7476  | 5.2460  |
| 0.4581  | -4.9256 | -3.2714 |

**Supplementary S2.** The Z-matrices of (5*S*\*,6*S*\*,9*S*\*,10*R*\*)-4 optimized at B3LYP/6-31G(d)-GD3BJ level by Gaussian.

| (5 <i>S</i> *,6 <i>S</i> *,9 <i>S</i> *,10 <i>R</i> *)-4A |         |         |         | (5 <i>S</i> *,6 <i>S</i> *,9 <i>S</i> *,10 <i>R</i> *)-4B |         |         | (5 <i>S</i> *,6 <i>S</i> *,9 <i>S</i> *,10 <i>R</i> *)-4C |         |         | (5 <i>S</i> *,6 <i>S</i> *,9 <i>S</i> *,10 <i>R</i> *)-4D |         |         | (5 <i>S</i> *,6 <i>S</i> *,9 <i>S</i> *,10 <i>R</i> *)-4E |         |         |
|-----------------------------------------------------------|---------|---------|---------|-----------------------------------------------------------|---------|---------|-----------------------------------------------------------|---------|---------|-----------------------------------------------------------|---------|---------|-----------------------------------------------------------|---------|---------|
| O                                                         | 3.4050  | -1.4303 | -1.3344 | 3.3965                                                    | -1.4316 | -1.3599 | 1.8292                                                    | 0.3811  | 3.5188  | -0.4553                                                   | -3.7733 | -1.0983 | 1.8242                                                    | 0.4097  | 3.5210  |
| C                                                         | 2.3377  | -1.6695 | -1.9170 | 2.3268                                                    | -1.6641 | -1.9407 | 1.8292                                                    | 1.2674  | 2.6526  | -1.3909                                                   | -2.9634 | -1.1666 | 1.8197                                                    | 1.2926  | 2.6516  |
| C                                                         | 1.0138  | -1.4380 | -1.1761 | 1.0092                                                    | -1.4359 | -1.1877 | 1.3972                                                    | 0.9141  | 1.2235  | -1.2906                                                   | -1.6416 | -0.3952 | 1.3933                                                    | 0.9248  | 1.2242  |
| C                                                         | 0.6714  | 0.1006  | -1.0195 | 0.6574                                                    | 0.1016  | -1.0434 | -0.1667                                                   | 0.6842  | 1.1060  | -0.2744                                                   | -0.6268 | -1.0637 | -0.1722                                                   | 0.7099  | 1.1013  |
| C                                                         | 1.8483  | 0.8452  | -0.3031 | 1.8326                                                    | 0.8562  | -0.3341 | -0.6446                                                   | -0.4032 | 2.1239  | 1.1305                                                    | -1.2943 | -1.2338 | -0.6617                                                   | -0.3700 | 2.1220  |
| C                                                         | -0.1396 | -2.2874 | -1.7391 | -0.1391                                                   | -2.3022 | -1.7317 | 1.9775                                                    | 1.8825  | 0.1732  | -2.6686                                                   | -1.0344 | -0.0717 | 1.9926                                                    | 1.8744  | 0.1692  |
| C                                                         | -1.4138 | -2.0898 | -0.9164 | -1.4247                                                   | -2.0977 | -0.9285 | 1.5669                                                    | 1.4798  | -1.2457 | -2.5255                                                   | 0.2389  | 0.7657  | 1.5722                                                    | 1.4931  | -1.2529 |
| C                                                         | -1.7750 | -0.6297 | -0.8437 | -1.7853                                                   | -0.6367 | -0.8648 | 0.0701                                                    | 1.3469  | -1.3338 | -1.6101                                                   | 1.2197  | 0.0818  | 0.0743                                                    | 1.3681  | -1.3375 |
| C                                                         | -0.6851 | 0.2420  | -0.2027 | -0.6989                                                   | 0.2406  | -0.2265 | -0.4949                                                   | 0.2747  | -0.3959 | -0.1959                                                   | 0.6732  | -0.1522 | -0.4972                                                   | 0.2992  | -0.4006 |
| C                                                         | -1.3805 | 1.7527  | 2.5886  | -1.4017                                                   | 1.7409  | 2.5616  | -1.4907                                                   | -2.0840 | -2.2290 | 2.1085                                                    | 2.1991  | 1.5361  | -1.4829                                                   | -2.0481 | -2.2455 |
| C                                                         | -2.0877 | 1.8705  | 1.2523  | -2.1079                                                   | 1.8669  | 1.2253  | -2.2557                                                   | -0.7944 | -2.0146 | 1.2337                                                    | 2.7731  | 0.4394  | -2.2554                                                   | -0.7635 | -2.0263 |
| C                                                         | -1.1253 | 1.7137  | 0.0585  | -1.1444                                                   | 1.7113  | 0.0321  | -1.9809                                                   | -0.1005 | -0.6617 | 0.8298                                                    | 1.7388  | -0.6318 | -1.9833                                                   | -0.0726 | -0.6712 |
| C                                                         | 0.5141  | 0.7642  | -2.4114 | 0.4942                                                    | 0.7552  | -2.4392 | -0.9313                                                   | 1.9817  | 1.4809  | -0.7480                                                   | -0.2441 | -2.4893 | -0.9276                                                   | 2.0147  | 1.4688  |
| C                                                         | 2.3410  | -2.1241 | -3.3539 | 2.3202                                                    | -2.1137 | -3.3791 | 2.1893                                                    | 2.6850  | 3.0159  | -2.5829                                                   | -3.2491 | -2.0433 | 2.1749                                                    | 2.7138  | 3.0050  |
| C                                                         | -1.4884 | 0.6245  | 3.3179  | -1.5134                                                   | 0.6093  | 3.2849  | -1.7373                                                   | -3.1547 | -1.4507 | 3.4159                                                    | 1.9687  | 1.3009  | -1.7165                                                   | -3.1200 | -1.4647 |
| C                                                         | -2.9574 | -0.2132 | -1.3295 | -2.9661                                                   | -0.2244 | -1.3578 | -0.6321                                                   | 2.1558  | -2.1453 | -2.0744                                                   | 2.4283  | -0.2793 | -0.6238                                                   | 2.1829  | -2.1465 |
| C                                                         | -0.6150 | 2.9758  | 3.0275  | -0.6331                                                   | 2.9599  | 3.0066  | -0.4689                                                   | -2.0530 | -3.3346 | 1.4397                                                    | 1.9777  | 2.8682  | -0.4685                                                   | -2.0092 | -3.3575 |
| O                                                         | 0.2344  | -3.6650 | -1.6779 | 0.2315                                                    | -3.6816 | -1.6671 | 3.4032                                                    | 1.8527  | 0.2646  | -3.4255                                                   | -1.9893 | 0.6744  | 3.4194                                                    | 1.8407  | 0.2560  |
| C                                                         | 2.1876  | 0.3288  | 1.0787  | 2.1790                                                    | 0.3414  | 1.0465  | -0.0113                                                   | -1.7687 | 1.9736  | 1.7857                                                    | -1.7477 | 0.0523  | -0.0288                                                   | -1.7366 | 1.9819  |
| O                                                         | 1.5895  | 0.6640  | 2.0942  | 1.5736                                                    | 0.6608  | 2.0626  | -0.4350                                                   | -2.6337 | 1.2161  | 2.4408                                                    | -1.0069 | 0.7758  | -0.4385                                                   | -2.6003 | 1.2156  |
| O                                                         | 3.1936  | -0.5656 | 1.1061  | 3.1942                                                    | -0.5431 | 1.0703  | 1.0784                                                    | -1.9674 | 2.7379  | 1.5704                                                    | -3.0405 | 0.3606  | 1.0522                                                    | -1.9343 | 2.7592  |
| C                                                         | -0.8053 | 0.3777  | 4.5984  | -0.8287                                                   | 0.3482  | 4.5619  | -1.0070                                                   | -4.4292 | -1.5505 | 4.3349                                                    | 1.3831  | 2.2886  | -0.9753                                                   | -4.3884 | -1.5638 |
| O                                                         | -1.4047 | 0.0502  | 5.6085  | -1.4257                                                   | -0.0009 | 5.5661  | -0.9970                                                   | -5.1408 | -2.5389 | 5.2530                                                    | 2.0054  | 2.7933  | -0.9440                                                   | -5.0929 | -2.5569 |
| O                                                         | 0.5334  | 0.4809  | 4.5113  | 0.5096                                                    | 0.4578  | 4.4761  | -0.3652                                                   | -4.7079 | -0.4000 | 4.0694                                                    | 0.0850  | 2.5232  | -0.3450                                                   | -4.6687 | -0.4071 |
| H                                                         | 1.2047  | -1.8462 | -0.1715 | 1.2113                                                    | -1.8326 | -0.1810 | 1.8944                                                    | -0.0494 | 1.0316  | -0.8750                                                   | -1.9424 | 0.5791  | 1.8812                                                    | -0.0457 | 1.0457  |
| H                                                         | 2.7573  | 0.8390  | -0.9157 | 2.7392                                                    | 0.8515  | -0.9505 | -0.5086                                                   | -0.0696 | 3.1595  | 1.0921                                                    | -2.1413 | -1.9285 | -0.5294                                                   | -0.0309 | 3.1565  |
| H                                                         | 1.6467  | 1.9166  | -0.1991 | 1.6260                                                    | 1.9266  | -0.2312 | -1.7297                                                   | -0.5483 | 2.0669  | 1.8375                                                    | -0.6198 | -1.7298 | -1.7468                                                   | -0.5125 | 2.0590  |
| H                                                         | -0.3336 | -2.0479 | -2.7903 | -0.3328                                                   | -2.0769 | -2.7859 | 1.6607                                                    | 2.9129  | 0.3687  | -3.2302                                                   | -0.8161 | -0.9866 | 1.6908                                                    | 2.9093  | 0.3631  |

|   |         |         |         |         |         |         |         |         |         |         |         |         |         |         |         |
|---|---------|---------|---------|---------|---------|---------|---------|---------|---------|---------|---------|---------|---------|---------|---------|
| H | -1.2770 | -2.4870 | 0.0982  | -1.3040 | -2.4859 | 0.0916  | 2.0422  | 0.5309  | -1.5267 | -2.1304 | -0.0028 | 1.7613  | 2.0358  | 0.5431  | -1.5495 |
| H | -2.2216 | -2.6913 | -1.3526 | -2.2248 | -2.7035 | -1.3725 | 1.9562  | 2.2180  | -1.9584 | -3.5206 | 0.6645  | 0.9480  | 1.9668  | 2.2371  | -1.9564 |
| H | -0.4975 | -0.2117 | 0.7786  | -0.5091 | -0.2104 | 0.7556  | 0.0884  | -0.6346 | -0.5958 | 0.1510  | 0.3286  | 0.8288  | 0.0840  | -0.6121 | -0.5972 |
| H | -2.9066 | 1.1454  | 1.1855  | -2.9290 | 1.1446  | 1.1545  | -2.0626 | -0.1081 | -2.8455 | 0.3551  | 3.2599  | 0.8752  | -2.0662 | -0.0728 | -2.8545 |
| H | -2.5656 | 2.8569  | 1.1964  | -2.5825 | 2.8550  | 1.1729  | -3.3301 | -1.0151 | -2.0755 | 1.7892  | 3.5785  | -0.0606 | -3.3286 | -0.9899 | -2.0878 |
| H | -1.5990 | 2.1328  | -0.8371 | -1.6188 | 2.1280  | -0.8641 | -2.6180 | 0.7892  | -0.5931 | 0.4385  | 2.2733  | -1.5057 | -2.6194 | 0.8178  | -0.6024 |
| H | -0.2638 | 2.3583  | 0.2420  | -0.2851 | 2.3587  | 0.2159  | -2.3433 | -0.7770 | 0.1169  | 1.7502  | 1.2634  | -0.9795 | -2.3485 | -0.7504 | 0.1051  |
| H | 1.4450  | 0.7124  | -2.9859 | 1.4267  | 0.7126  | -3.0118 | -0.7550 | 2.2596  | 2.5257  | -0.7737 | -1.1184 | -3.1484 | -0.7603 | 2.2903  | 2.5157  |
| H | -0.2697 | 0.2936  | -3.0120 | -0.2823 | 0.2709  | -3.0384 | -0.6391 | 2.8364  | 0.8643  | -1.7477 | 0.1993  | -2.4946 | -0.6198 | 2.8667  | 0.8562  |
| H | 0.2649  | 1.8269  | -2.3199 | 0.2315  | 1.8152  | -2.3542 | -2.0132 | 1.8512  | 1.3722  | -0.0664 | 0.4761  | -2.9545 | -2.0095 | 1.8951  | 1.3485  |
| H | 2.0751  | -3.1806 | -3.4183 | 2.0547  | -3.1703 | -3.4442 | 2.2498  | 2.7719  | 4.1051  | -3.4540 | -3.4909 | -1.4319 | 2.2318  | 2.8092  | 4.0937  |
| H | 1.6539  | -1.5195 | -3.9491 | 1.6279  | -1.5088 | -3.9677 | 3.1615  | 2.9494  | 2.5964  | -2.7952 | -2.3967 | -2.6915 | 3.1478  | 2.9768  | 2.5859  |
| H | 3.3456  | -1.9956 | -3.7683 | 3.3216  | -1.9827 | -3.8003 | 1.4202  | 3.3768  | 2.6670  | -2.3605 | -4.1093 | -2.6821 | 1.4058  | 3.4016  | 2.6482  |
| H | -2.1227 | -0.1974 | 3.0034  | -2.1530 | -0.2071 | 2.9662  | -2.4752 | -3.1223 | -0.6569 | 3.8834  | 2.2140  | 0.3544  | -2.4513 | -3.0917 | -0.6676 |
| H | -3.6681 | -0.9111 | -1.7657 | -3.6727 | -0.9270 | -1.7941 | -0.1409 | 2.8968  | -2.7710 | -3.0992 | 2.7270  | -0.0723 | -0.1272 | 2.9229  | -2.7696 |
| H | -3.2775 | 0.8225  | -1.3149 | -3.2879 | 0.8108  | -1.3527 | -1.7137 | 2.1261  | -2.2191 | -1.4694 | 3.1693  | -0.7900 | -1.7056 | 2.1619  | -2.2189 |
| H | -1.2501 | 3.8647  | 2.9488  | -1.2660 | 3.8508  | 2.9321  | 0.1247  | -2.9679 | -3.4041 | 2.1364  | 1.6666  | 3.6517  | 0.1337  | -2.9181 | -3.4294 |
| H | -0.2815 | 2.9219  | 4.0675  | -0.3004 | 2.8999  | 4.0464  | -0.9656 | -1.9034 | -4.2988 | 0.9717  | 2.9072  | 3.2098  | -0.9726 | -1.8658 | -4.3188 |
| H | 0.2669  | 3.1273  | 2.3983  | 0.2493  | 3.1123  | 2.3784  | 0.2337  | -1.2283 | -3.1776 | 0.6641  | 1.2112  | 2.7943  | 0.2272  | -1.1776 | -3.2062 |
| H | -0.5344 | -4.2020 | -1.9430 | 0.2008  | -3.9762 | -0.7384 | 3.7669  | 2.3849  | -0.4662 | -4.2578 | -1.5667 | 0.9542  | 3.7406  | 1.0023  | -0.1236 |
| H | 3.5440  | -0.8279 | 0.2165  | 3.5545  | -0.7914 | 0.1806  | 1.3655  | -1.1821 | 3.2711  | 0.9669  | -3.5235 | -0.2603 | 1.3275  | -1.1519 | 3.3030  |
| H | 0.8727  | 0.6219  | 3.5911  | 0.8490  | 0.6177  | 3.5593  | -0.3917 | -3.9664 | 0.2570  | 3.3739  | -0.2906 | 1.9250  | -0.3898 | -3.9339 | 0.2559  |

**Supplementary S3.** The Z-matrices of (2S\*,5S\*,9S\*,10R\*)-5 optimized at B3LYP/6-31G(d)-GD3BJ level by Gaussian.

| (2S*,5S*,9S*,10R*)-5A |         |         |         | (2S*,5S*,9S*,10R*)-5B |         |         | (2S*,5S*,9S*,10R*)-5C |         |         | (2S*,5S*,9S*,10R*)-5D |         |         | (2S*,5S*,9S*,10R*)-5E |         |         |
|-----------------------|---------|---------|---------|-----------------------|---------|---------|-----------------------|---------|---------|-----------------------|---------|---------|-----------------------|---------|---------|
| C                     | -2.4516 | 0.2773  | 0.6814  | -2.3235               | 0.2063  | 1.2149  | -2.2949               | -0.7981 | -0.1321 | -2.5136               | 1.5740  | 0.9578  | -2.6446               | -0.0297 | 1.1256  |
| C                     | -2.7153 | 1.0713  | -0.5925 | -2.6128               | 1.5410  | 0.5382  | -2.1677               | -1.1155 | -1.6141 | -2.0365               | 3.0185  | 0.8689  | -2.9181               | 1.3475  | 0.5342  |
| C                     | -2.2029 | 0.3701  | -1.8806 | -2.4039               | 1.5184  | -0.9967 | -0.9012               | -1.9419 | -1.9514 | -1.2031               | 3.3187  | -0.4011 | -2.5837               | 1.4487  | -0.9742 |
| C                     | -0.6957 | -0.0208 | -1.6841 | -0.9762               | 0.9463  | -1.3061 | 0.3534                | -1.1995 | -1.3692 | -0.0525               | 2.2575  | -0.5197 | -1.1191               | 0.9348  | -1.2083 |
| C                     | -0.3203 | -0.7735 | -0.3642 | -0.5561               | -0.3812 | -0.5851 | 0.3102                | -0.7378 | 0.1310  | -0.4350               | 0.7457  | -0.3427 | -0.7093               | -0.4290 | -0.5475 |
| C                     | -0.9784 | -0.0502 | 0.8262  | -0.9059               | -0.2678 | 0.9204  | -1.0588               | -0.0903 | 0.3919  | -1.3379               | 0.6021  | 0.9128  | -1.1856               | -0.4315 | 0.9307  |
| C                     | -0.0124 | -0.7265 | -2.8580 | -0.6031               | 0.8438  | -2.7862 | 1.7017                | -1.8615 | -1.6359 | 0.8561                | 2.4017  | -1.7410 | -0.6395               | 0.9479  | -2.6596 |
| C                     | 1.4037  | -1.1364 | -2.6647 | 0.7389                | 0.2967  | -3.1020 | 2.8963                | -1.1299 | -1.1593 | 1.9380                | 1.4010  | -1.8947 | 0.7305                | 0.4467  | -2.9184 |
| C                     | 2.0057  | -1.0827 | -1.4620 | 1.5070                | -0.2900 | -2.1666 | 2.7964                | -0.0968 | -0.3043 | 2.0021                | 0.2944  | -1.1333 | 1.4504                | -0.1886 | -1.9766 |
| C                     | 1.2597  | -0.6654 | -0.1892 | 1.0265                | -0.5219 | -0.7256 | 1.4618                | 0.3595  | 0.3365  | 0.9190                | -0.0702 | -0.1042 | 0.8888                | -0.5201 | -0.5831 |
| C                     | 2.1503  | 0.7946  | 2.5094  | 2.5993                | -1.0314 | 2.0913  | -0.2052               | 2.6384  | 2.0099  | 1.2583                | -3.7755 | 1.1807  | 2.7665                | -0.9092 | 1.9706  |
| C                     | 2.7287  | -0.5027 | 1.9602  | 2.8487                | -1.6666 | 0.7320  | 0.6071                | 1.5211  | 2.6451  | 1.5565                | -2.2917 | 1.0577  | 2.7521                | -1.8164 | 0.7525  |
| C                     | 1.7666  | -1.3610 | 1.1142  | 1.5670                | -1.8468 | -0.1015 | 1.7181                | 0.8650  | 1.7980  | 0.6691                | -1.6059 | 0.0052  | 1.4133                | -1.8747 | -0.0095 |
| C                     | -0.7638 | -2.2586 | -0.3711 | -1.2572               | -1.6279 | -1.1836 | 0.5120                | -1.9029 | 1.1275  | -1.1818               | 0.1724  | -1.5751 | -1.3194               | -1.6541 | -1.2767 |
| C                     | -3.1404 | -0.8019 | -2.2299 | -3.5760               | 0.7634  | -1.6551 | -1.0951               | -3.3910 | -1.4636 | -2.1502               | 3.4071  | -1.6152 | -3.6776               | 0.7213  | -1.7823 |
| C                     | -2.3272 | 1.4085  | -3.0263 | -2.4890               | 2.9922  | -1.4753 | -0.8075               | -1.9912 | -3.4994 | -0.5908               | 4.7309  | -0.2018 | -2.6734               | 2.9533  | -1.3446 |
| C                     | 1.0786  | 0.8010  | 3.3306  | 2.9757                | 0.2426  | 2.3222  | -1.5536               | 2.5845  | 2.0544  | 0.6996                | -4.2576 | 2.3096  | 3.4549                | 0.2500  | 1.9300  |
| C                     | 3.4853  | -1.3534 | -1.3774 | 2.9215                | -0.6615 | -2.5329 | 4.0472                | 0.6943  | -0.0064 | 3.2217                | -0.5813 | -1.2607 | 2.8829                | -0.5256 | -2.2948 |
| C                     | 2.8871  | 2.0388  | 2.0798  | 2.0159                | -1.9517 | 3.1340  | 0.5811                | 3.7611  | 1.3858  | 1.7117                | -4.6218 | 0.0187  | 1.9742                | -1.3986 | 3.1557  |
| O                     | -0.5294 | -0.9209 | -3.9531 | -1.3013               | 1.2369  | -3.7147 | 1.8645                | -2.9064 | -2.2558 | 0.7948                | 3.3142  | -2.5583 | -1.2771               | 1.3954  | -3.6072 |
| O                     | -2.7768 | 1.0631  | 1.8343  | -2.4221               | 0.3656  | 2.6300  | -3.3875               | 0.1115  | 0.0819  | -3.1876               | 1.3802  | 2.1998  | -2.9022               | 0.0005  | 2.5284  |
| C                     | 0.5073  | 2.0186  | 3.9389  | 2.8197                | 0.9939  | 3.5815  | -2.4806               | 3.5218  | 1.3948  | 0.3645                | -5.6682 | 2.5797  | 3.5850                | 1.2329  | 3.0211  |
| O                     | 1.1590  | 2.8295  | 4.5740  | 3.7231                | 1.6546  | 4.0639  | -2.4413               | 4.7334  | 1.5031  | 0.6762                | -6.2358 | 3.6113  | 3.3883                | 2.4241  | 2.8599  |
| O                     | -0.8202 | 2.1204  | 3.7381  | 1.5719                | 0.9470  | 4.0827  | -3.3932               | 2.8548  | 0.6566  | -0.3864               | -6.2219 | 1.6086  | 4.0317                | 0.6870  | 4.1674  |
| H                     | -3.0616 | -0.6300 | 0.7198  | -3.0533               | -0.5545 | 0.9228  | -2.5013               | -1.6994 | 0.4531  | -3.2321               | 1.3442  | 0.1657  | -3.3111               | -0.7836 | 0.6969  |
| H                     | -3.7901 | 1.2841  | -0.6697 | -3.6357               | 1.8576  | 0.7836  | -3.0733               | -1.6365 | -1.9525 | -2.9026               | 3.6915  | 0.9297  | -3.9668               | 1.6196  | 0.7157  |
| H                     | -2.2400 | 2.0578  | -0.4925 | -1.9665               | 2.3070  | 0.9908  | -2.1593               | -0.1705 | -2.1762 | -1.4432               | 3.2440  | 1.7669  | -2.3344               | 2.0899  | 1.0975  |
| H                     | -0.1755 | 0.9515  | -1.6345 | -0.2908               | 1.7217  | -0.9219 | 0.4014                | -0.2691 | -1.9620 | 0.6155                | 2.4925  | 0.3271  | -0.4881               | 1.6984  | -0.7215 |



|   |         |         |         |         |         |         |         |         |         |         |         |         |         |         |         |
|---|---------|---------|---------|---------|---------|---------|---------|---------|---------|---------|---------|---------|---------|---------|---------|
| H | -0.4510 | 0.8975  | 0.9965  | -0.2077 | 0.4272  | 1.4071  | -1.0582 | 0.9173  | -0.0414 | -0.7337 | 0.7466  | 1.8198  | -0.5564 | 0.2481  | 1.5226  |
| H | -0.8653 | -0.6273 | 1.7500  | -0.7583 | -1.2240 | 1.4350  | -1.2154 | 0.0128  | 1.4651  | -1.7396 | -0.4140 | 1.0022  | -1.0495 | -1.4168 | 1.3910  |
| H | 1.9223  | -1.4315 | -3.5710 | 1.0688  | 0.4553  | -4.1236 | 3.8380  | -1.4559 | -1.5882 | 2.6941  | 1.6565  | -2.6301 | 1.1191  | 0.6736  | -3.9058 |
| H | 1.4862  | 0.4060  | -0.0932 | 1.4615  | 0.3126  | -0.1579 | 1.1677  | 1.2421  | -0.2489 | 1.3200  | 0.2634  | 0.8648  | 1.2549  | 0.2845  | 0.0680  |
| H | 3.6288  | -0.2882 | 1.3730  | 3.5904  | -1.0897 | 0.1701  | 1.0889  | 1.9462  | 3.5373  | 1.4003  | -1.7949 | 2.0242  | 3.5635  | -1.5445 | 0.0714  |
| H | 3.0759  | -1.1041 | 2.8110  | 3.3078  | -2.6510 | 0.8899  | -0.0443 | 0.7344  | 3.0416  | 2.6187  | -2.1707 | 0.8292  | 3.0012  | -2.8329 | 1.0862  |
| H | 2.2616  | -2.3091 | 0.8738  | 1.7580  | -2.5827 | -0.8920 | 2.5118  | 1.6223  | 1.7598  | 0.7969  | -2.0782 | -0.9765 | 1.5102  | -2.6055 | -0.8231 |
| H | 0.9409  | -1.6513 | 1.7686  | 0.8243  | -2.3233 | 0.5438  | 2.1454  | 0.0430  | 2.3879  | -0.3651 | -1.8142 | 0.2948  | 0.6857  | -2.3170 | 0.6755  |
| H | -1.8465 | -2.3697 | -0.3193 | -2.3353 | -1.6153 | -1.0321 | 0.4952  | -1.5471 | 2.1630  | -2.1443 | 0.6514  | -1.7448 | -2.4066 | -1.6749 | -1.2278 |
| H | -0.4209 | -2.7975 | -1.2588 | -1.0790 | -1.7342 | -2.2575 | -0.2792 | -2.6487 | 1.0646  | -0.6028 | 0.2682  | -2.4983 | -1.0399 | -1.6960 | -2.3334 |
| H | -0.3778 | -2.8038 | 0.4956  | -0.9139 | -2.5544 | -0.7133 | 1.4649  | -2.4198 | 0.9824  | -1.4087 | -0.8914 | -1.4513 | -0.9929 | -2.5958 | -0.8236 |
| H | -4.1324 | -0.4282 | -2.5130 | -4.5099 | 1.3270  | -1.5354 | -0.1989 | -4.0016 | -1.5972 | -2.8122 | 4.2773  | -1.5212 | -4.6393 | 1.2393  | -1.6763 |
| H | -2.7735 | -1.3925 | -3.0731 | -3.4323 | 0.6186  | -2.7284 | -1.3894 | -3.4557 | -0.4164 | -1.6138 | 3.5229  | -2.5598 | -3.4578 | 0.6867  | -2.8519 |
| H | -3.3079 | -1.4807 | -1.3943 | -3.7636 | -0.2127 | -1.2086 | -1.8978 | -3.8810 | -2.0290 | -2.8100 | 2.5454  | -1.7101 | -3.8547 | -0.2995 | -1.4458 |
| H | -2.0934 | 0.9766  | -4.0035 | -2.4631 | 3.0756  | -2.5655 | -0.0013 | -2.6447 | -3.8448 | -0.0699 | 5.0866  | -1.0953 | -2.5592 | 3.1230  | -2.4190 |
| H | -3.3477 | 1.8053  | -3.0877 | -3.4223 | 3.4608  | -1.1405 | -1.7379 | -2.3722 | -3.9373 | -1.3694 | 5.4678  | 0.0291  | -3.6452 | 3.3717  | -1.0561 |
| H | -1.6562 | 2.2603  | -2.8674 | -1.6632 | 3.5905  | -1.0741 | -0.6342 | -0.9944 | -3.9206 | 0.1238  | 4.7425  | 0.6290  | -1.9025 | 3.5377  | -0.8297 |
| H | 0.5861  | -0.1189 | 3.6240  | 3.4972  | 0.8158  | 1.5604  | -2.0598 | 1.7680  | 2.5596  | 0.4955  | -3.6093 | 3.1573  | 3.9367  | 0.5815  | 1.0143  |
| H | 3.6930  | -2.2508 | -0.7885 | 3.6299  | -0.1349 | -1.8865 | 4.8819  | 0.4078  | -0.6561 | 3.7557  | -0.6256 | -0.3068 | 3.5540  | -0.0299 | -1.5871 |
| H | 3.9310  | -1.5095 | -2.3663 | 3.0884  | -1.7385 | -2.4478 | 3.8693  | 1.7625  | -0.1686 | 2.9552  | -1.5936 | -1.5766 | 3.0517  | -1.6056 | -2.2658 |
| H | 4.0016  | -0.5006 | -0.9265 | 3.1657  | -0.3833 | -3.5645 | 4.3730  | 0.5345  | 1.0260  | 3.9308  | -0.1960 | -2.0025 | 3.1748  | -0.1877 | -3.2958 |
| H | 3.8876  | 2.0536  | 2.5239  | 0.9540  | -2.1280 | 2.9418  | 1.1923  | 3.3969  | 0.5556  | 1.0341  | -4.4976 | -0.8314 | 0.9584  | -1.6737 | 2.8594  |
| H | 2.9939  | 2.0561  | 0.9898  | 2.5333  | -2.9170 | 3.1207  | -0.0443 | 4.5637  | 0.9895  | 2.7187  | -4.3271 | -0.2957 | 2.4557  | -2.2810 | 3.5890  |
| H | 2.3782  | 2.9649  | 2.3577  | 2.1182  | -1.5614 | 4.1504  | 1.2474  | 4.2069  | 2.1320  | 1.7618  | -5.6865 | 0.2634  | 1.8712  | -0.6460 | 3.9417  |
| H | -3.7063 | 1.3449  | 1.7367  | -3.3251 | 0.6721  | 2.8281  | -4.1841 | -0.3233 | -0.2814 | -3.9390 | 1.9981  | 2.2267  | -3.8226 | 0.2905  | 2.6528  |
| H | -1.2389 | 1.4958  | 3.1048  | 0.9342  | 0.4610  | 3.5257  | -3.2617 | 1.8789  | 0.5778  | -0.6267 | -5.5882 | 0.9075  | 4.2207  | -0.2663 | 4.0874  |

| (2 <i>S</i> *,5 <i>S</i> *,9 <i>S</i> *,10 <i>R</i> *)-5F |         |         |         |
|-----------------------------------------------------------|---------|---------|---------|
| C                                                         | -3.1903 | 0.2455  | -0.0763 |
| C                                                         | -3.4145 | 0.8187  | -1.4703 |
| C                                                         | -2.5205 | 0.1741  | -2.5578 |
| C                                                         | -1.0252 | 0.2171  | -2.0818 |
| C                                                         | -0.7127 | -0.2662 | -0.6217 |
| C                                                         | -1.7322 | 0.3886  | 0.3503  |
| C                                                         | -0.0086 | -0.4022 | -3.0418 |
| C                                                         | 1.4084  | -0.4092 | -2.6081 |
| C                                                         | 1.7756  | -0.0821 | -1.3564 |
| C                                                         | 0.7569  | 0.2408  | -0.2505 |
| C                                                         | 2.4923  | 0.3221  | 3.2816  |
| C                                                         | 1.9885  | 0.8294  | 1.9425  |
| C                                                         | 1.2096  | -0.2425 | 1.1614  |
| C                                                         | -0.7875 | -1.8085 | -0.4764 |
| C                                                         | -3.0673 | -1.2284 | -2.8935 |
| C                                                         | -2.6871 | 1.0418  | -3.8340 |
| C                                                         | 3.7800  | -0.0583 | 3.4070  |
| C                                                         | 3.2489  | 0.0251  | -1.0574 |
| C                                                         | 1.4622  | 0.2669  | 4.3803  |
| O                                                         | -0.2702 | -0.8274 | -4.1623 |
| O                                                         | -3.9884 | 0.9698  | 0.8585  |
| C                                                         | 4.4307  | -0.5558 | 4.6329  |
| O                                                         | 5.1067  | -1.5687 | 4.6559  |
| O                                                         | 4.2736  | 0.2731  | 5.6821  |
| H                                                         | -3.5054 | -0.8006 | -0.0221 |
| H                                                         | -4.4759 | 0.7216  | -1.7363 |
| H                                                         | -3.2335 | 1.9027  | -1.4328 |
| H                                                         | -0.7711 | 1.2912  | -2.0966 |
| H                                                         | -1.5053 | 1.4590  | 0.4563  |

| (2 <i>S</i> *,5 <i>S</i> *,9 <i>S</i> *,10 <i>R</i> *)-5G |         |         |
|-----------------------------------------------------------|---------|---------|
| -2.8065                                                   | 0.8214  | 1.1983  |
| -3.4550                                                   | 1.5264  | 0.0131  |
| -3.2200                                                   | 0.8111  | -1.3397 |
| -1.6831                                                   | 0.5452  | -1.5165 |
| -0.9119                                                   | -0.0942 | -0.3086 |
| -1.3031                                                   | 0.6623  | 0.9904  |
| -1.2813                                                   | -0.1761 | -2.8035 |
| 0.1599                                                    | -0.4665 | -2.9890 |
| 1.0552                                                    | -0.3052 | -1.9986 |
| 0.6516                                                    | 0.1060  | -0.5727 |
| 3.6047                                                    | -0.4090 | 1.9772  |
| 2.7589                                                    | 0.2680  | 0.9144  |
| 1.5269                                                    | -0.5675 | 0.5281  |
| -1.2253                                                   | -1.6031 | -0.1349 |
| -4.1206                                                   | -0.4389 | -1.4116 |
| -3.7107                                                   | 1.7860  | -2.4435 |
| 3.4723                                                    | -0.0466 | 3.2694  |
| 2.5150                                                    | -0.4795 | -2.3294 |
| 4.5310                                                    | -1.4842 | 1.4708  |
| -2.0491                                                   | -0.4676 | -3.7146 |
| -3.0005                                                   | 1.6115  | 2.3700  |
| 4.2294                                                    | -0.5980 | 4.4081  |
| 3.6952                                                    | -1.0009 | 5.4255  |
| 5.5624                                                    | -0.5237 | 4.2312  |
| -3.2727                                                   | -0.1501 | 1.3862  |
| -4.5302                                                   | 1.6447  | 0.2051  |
| -3.0649                                                   | 2.5534  | -0.0353 |
| -1.2503                                                   | 1.5530  | -1.6410 |
| -0.8461                                                   | 1.6621  | 0.9864  |

| (2 <i>S</i> *,5 <i>S</i> *,9 <i>S</i> *,10 <i>R</i> *)-5H |         |         |
|-----------------------------------------------------------|---------|---------|
| -2.5147                                                   | 0.0913  | 1.1944  |
| -2.8178                                                   | 1.4375  | 0.5470  |
| -2.5628                                                   | 1.4611  | -0.9805 |
| -1.1154                                                   | 0.9240  | -1.2647 |
| -0.6818                                                   | -0.4109 | -0.5618 |
| -1.0721                                                   | -0.3366 | 0.9400  |
| -0.7079                                                   | 0.8651  | -2.7378 |
| 0.6478                                                    | 0.3469  | -3.0386 |
| 1.4092                                                    | -0.2481 | -2.1032 |
| 0.9084                                                    | -0.5210 | -0.6754 |
| 2.6641                                                    | -0.9520 | 2.0017  |
| 2.7776                                                    | -1.7306 | 0.7020  |
| 1.4547                                                    | -1.8567 | -0.0785 |
| -1.3425                                                   | -1.6596 | -1.2015 |
| -3.7018                                                   | 0.7046  | -1.6939 |
| -2.6625                                                   | 2.9462  | -1.4205 |
| 3.1296                                                    | 0.3117  | 2.0698  |
| 2.8317                                                    | -0.5922 | -2.4608 |
| 2.0027                                                    | -1.6858 | 3.1410  |
| -1.3884                                                   | 1.2733  | -3.6730 |
| -2.7221                                                   | 0.1867  | 2.6028  |
| 3.0695                                                    | 1.1872  | 3.2527  |
| 2.5691                                                    | 2.2973  | 3.2247  |
| 3.6877                                                    | 0.6569  | 4.3238  |
| -3.2077                                                   | -0.6742 | 0.8347  |
| -3.8549                                                   | 1.7216  | 0.7718  |
| -2.2038                                                   | 2.2071  | 1.0369  |
| -0.4555                                                   | 1.7039  | -0.8466 |
| -0.4055                                                   | 0.3655  | 1.4602  |

| (2 <i>S</i> *,5 <i>S</i> *,9 <i>S</i> *,10 <i>R</i> *)-5I |         |         |
|-----------------------------------------------------------|---------|---------|
| -2.4546                                                   | -0.9033 | 0.9835  |
| -3.0910                                                   | -0.6478 | -0.3765 |
| -2.3069                                                   | -1.2839 | -1.5532 |
| -0.8011                                                   | -0.8494 | -1.4616 |
| -0.0888                                                   | -0.9790 | -0.0689 |
| -1.0194                                                   | -0.3895 | 1.0244  |
| 0.1225                                                    | -1.4088 | -2.5454 |
| 1.5555                                                    | -1.0333 | -2.4674 |
| 2.0739                                                    | -0.4074 | -1.3957 |
| 1.2494                                                    | -0.1065 | -0.1354 |
| 1.7735                                                    | 2.2901  | 1.8363  |
| 2.7395                                                    | 1.1340  | 1.6353  |
| 2.0805                                                    | -0.1879 | 1.1849  |
| 0.2573                                                    | -2.4457 | 0.2935  |
| -2.5524                                                   | -2.8062 | -1.5613 |
| -2.9342                                                   | -0.7186 | -2.8553 |
| 0.7690                                                    | 2.1887  | 2.7300  |
| 3.4980                                                    | 0.0768  | -1.4721 |
| 1.9968                                                    | 3.4683  | 0.9233  |
| -0.2439                                                   | -2.0830 | -3.5024 |
| -3.2158                                                   | -0.2432 | 1.9930  |
| -0.3000                                                   | 3.1822  | 2.9215  |
| -1.4786                                                   | 2.9133  | 2.7656  |
| 0.1686                                                    | 4.3743  | 3.3311  |
| -2.4861                                                   | -1.9688 | 1.2269  |
| -4.1291                                                   | -1.0065 | -0.3638 |
| -3.1711                                                   | 0.4386  | -0.5256 |
| -0.8251                                                   | 0.2324  | -1.6799 |
| -1.0466                                                   | 0.7034  | 0.9232  |

|   |         |         |         |         |         |         |         |         |         |         |         |         |
|---|---------|---------|---------|---------|---------|---------|---------|---------|---------|---------|---------|---------|
| H | -1.6381 | -0.0198 | 1.3633  | -0.8918 | 0.1695  | 1.8791  | -0.9151 | -1.2989 | 1.4403  | -0.6269 | -0.5782 | 2.0297  |
| H | 2.1226  | -0.6505 | -3.3888 | 0.4383  | -0.7690 | -3.9933 | 0.9924  | 0.5328  | -4.0506 | 2.1341  | -1.2567 | -3.3578 |
| H | 0.7100  | 1.3398  | -0.2159 | 0.8425  | 1.1886  | -0.5220 | 1.3150  | 0.3054  | -0.0783 | 0.9245  | 0.9345  | -0.2633 |
| H | 1.3458  | 1.7029  | 2.1126  | 2.4195  | 1.2471  | 1.2784  | 3.5542  | -1.2931 | 0.0675  | 3.5220  | 1.4222  | 0.9266  |
| H | 2.8318  | 1.1994  | 1.3520  | 3.3925  | 0.4809  | 0.0490  | 3.1397  | -2.7395 | 0.9400  | 3.2657  | 0.9568  | 2.5829  |
| H | 1.8023  | -1.1623 | 1.0795  | 1.8213  | -1.5753 | 0.2118  | 1.5902  | -2.5929 | -0.8811 | 2.8593  | -0.9556 | 1.0929  |
| H | 0.3455  | -0.5116 | 1.7734  | 0.9548  | -0.7111 | 1.4495  | 0.7284  | -2.3158 | 0.5964  | 1.4609  | -0.5271 | 2.0193  |
| H | -1.7891 | -2.1993 | -0.6462 | -2.2682 | -1.7907 | 0.1141  | -2.4255 | -1.6647 | -1.0932 | 0.8039  | -2.5094 | 1.2399  |
| H | -0.1141 | -2.3278 | -1.1644 | -0.9945 | -2.1850 | -1.0319 | -1.1212 | -1.7502 | -2.2689 | -0.6276 | -3.0647 | 0.4316  |
| H | -0.5208 | -2.1333 | 0.5344  | -0.6512 | -2.0438 | 0.6864  | -1.0030 | -2.5859 | -0.7275 | 0.8790  | -2.9304 | -0.4647 |
| H | -4.0507 | -1.1506 | -3.3742 | -5.1775 | -0.1469 | -1.4552 | -4.6508 | 1.2428  | -1.5760 | -1.9681 | -3.3211 | -2.3277 |
| H | -2.4232 | -1.7764 | -3.5851 | -3.9268 | -1.0466 | -2.2985 | -3.5309 | 0.6032  | -2.7681 | -2.3389 | -3.2820 | -0.6050 |
| H | -3.2192 | -1.8528 | -2.0137 | -4.0307 | -1.0846 | -0.5387 | -3.8771 | -0.2914 | -1.2888 | -3.6073 | -3.0224 | -1.7723 |
| H | -2.1827 | 0.6057  | -4.7008 | -3.6936 | 1.3297  | -3.4372 | -2.6066 | 3.0611  | -2.5067 | -2.5212 | -1.1888 | -3.7522 |
| H | -3.7455 | 1.1488  | -4.1008 | -4.7432 | 2.1043  | -2.2557 | -3.6141 | 3.3877  | -1.1006 | -4.0175 | -0.8880 | -2.8751 |
| H | -2.2860 | 2.0508  | -3.6858 | -3.0935 | 2.6908  | -2.4799 | -1.8605 | 3.5483  | -0.9786 | -2.7728 | 0.3620  | -2.9396 |
| H | 4.4428  | -0.0766 | 2.5463  | 2.7167  | 0.6722  | 3.5749  | 3.5279  | 0.8128  | 1.1921  | 0.6158  | 1.2839  | 3.3104  |
| H | 3.5492  | -0.6681 | -0.2672 | 2.9675  | -1.2778 | -1.7350 | 3.5252  | -0.0562 | -1.8058 | 4.1231  | -0.4034 | -0.7144 |
| H | 3.8654  | -0.2094 | -1.9328 | 2.6708  | -0.7430 | -3.3818 | 3.0150  | -1.6671 | -2.3818 | 3.9555  | -0.1392 | -2.4443 |
| H | 3.5005  | 1.0471  | -0.7591 | 3.0558  | 0.4553  | -2.1546 | 3.0801  | -0.3039 | -3.4887 | 3.5354  | 1.1622  | -1.3386 |
| H | 1.1755  | 1.2810  | 4.6764  | 3.9896  | -2.1923 | 0.8355  | 1.0398  | -2.1016 | 2.8311  | 2.0605  | 3.1359  | -0.1182 |
| H | 0.5639  | -0.2595 | 4.0434  | 5.3353  | -1.0372 | 0.8779  | 2.6407  | -2.5105 | 3.4744  | 1.1944  | 4.2088  | 0.9692  |
| H | 1.8138  | -0.2615 | 5.2703  | 4.9845  | -2.0716 | 2.2735  | 1.7991  | -1.0453 | 4.0031  | 2.9350  | 3.9689  | 1.1830  |
| H | -4.9189 | 0.8620  | 0.5948  | -3.9592 | 1.6808  | 2.5220  | -2.1715 | 0.9135  | 2.9436  | -3.0650 | 0.7188  | 1.9236  |
| H | 3.7817  | 1.0843  | 5.4558  | 5.8099  | -0.0843 | 3.3966  | 4.0938  | -0.2109 | 4.1394  | 1.1365  | 4.3799  | 3.4561  |

**Supplementary S4.** The Z-matrices of (4*S*\*,5*R*\*,9*S*\*,10*R*\*)-**6** optimized at B3LYP/6-31G(d)-GD3BJ level by Gaussian.

| (4 <i>S</i> *,5 <i>R</i> *,9 <i>S</i> *,10 <i>R</i> *)- <b>6A</b> |         |         |         | (4 <i>S</i> *,5 <i>R</i> *,9 <i>S</i> *,10 <i>R</i> *)- <b>6B</b> |         |         | (4 <i>S</i> *,5 <i>R</i> *,9 <i>S</i> *,10 <i>R</i> *)- <b>6C</b> |         |         | (4 <i>S</i> *,5 <i>R</i> *,9 <i>S</i> *,10 <i>R</i> *)- <b>6D</b> |         |         | (4 <i>S</i> *,5 <i>R</i> *,9 <i>S</i> *,10 <i>R</i> *)- <b>6E</b> |         |         |
|-------------------------------------------------------------------|---------|---------|---------|-------------------------------------------------------------------|---------|---------|-------------------------------------------------------------------|---------|---------|-------------------------------------------------------------------|---------|---------|-------------------------------------------------------------------|---------|---------|
| C                                                                 | -2.6213 | -0.8604 | 0.8885  | -2.1854                                                           | -1.8806 | 1.3586  | -1.6473                                                           | -2.7805 | 0.4776  | -2.5340                                                           | -1.5096 | 1.2668  | -2.3396                                                           | -1.7803 | 1.4335  |
| C                                                                 | -2.0764 | -1.1379 | 2.2835  | -1.6769                                                           | -1.9430 | 2.7932  | -1.2399                                                           | -3.1121 | 1.9076  | -2.0245                                                           | -1.8142 | 2.6695  | -1.8022                                                           | -1.8606 | 2.8565  |
| C                                                                 | -1.2086 | 0.0181  | 2.8526  | -1.0979                                                           | -0.5961 | 3.3075  | -1.1209                                                           | -1.8645 | 2.8260  | -1.1808                                                           | -0.6657 | 3.2884  | -1.1442                                                           | -0.5420 | 3.3489  |
| C                                                                 | -0.0970 | 0.3649  | 1.7959  | -0.0239                                                           | -0.0945 | 2.2741  | -0.1767                                                           | -0.8223 | 2.1220  | -0.0461                                                           | -0.2825 | 2.2692  | -0.0705                                                           | -0.1002 | 2.2882  |
| C                                                                 | -0.5730 | 0.6261  | 0.3247  | -0.4609                                                           | -0.0378 | 0.7693  | -0.5097                                                           | -0.4570 | 0.6339  | -0.4882                                                           | 0.0094  | 0.7932  | -0.5386                                                           | -0.0301 | 0.7932  |
| C                                                                 | -1.5078 | -0.5429 | -0.1032 | -1.1047                                                           | -1.4049 | 0.3939  | -0.6938                                                           | -1.7799 | -0.1663 | -1.3963                                                           | -1.1608 | 0.3134  | -1.2585                                                           | -1.3652 | 0.4416  |
| C                                                                 | 0.9053  | 1.4350  | 2.2252  | 0.7110                                                            | 1.1881  | 2.6613  | 0.1181                                                            | 0.4439  | 2.9253  | 0.9353                                                            | 0.7853  | 2.7506  | 0.7369                                                            | 1.1456  | 2.6508  |
| C                                                                 | 1.8894  | 1.8982  | 1.2229  | 1.6299                                                            | 1.7826  | 1.6661  | 0.8825                                                            | 1.5205  | 2.2584  | 1.9327                                                            | 1.2919  | 1.7828  | 1.6545                                                            | 1.6947  | 1.6287  |
| C                                                                 | 1.8423  | 1.5114  | -0.0635 | 1.7344                                                            | 1.3108  | 0.4119  | 1.2058                                                            | 1.4718  | 0.9546  | 1.9213                                                            | 0.9386  | 0.4860  | 1.7070                                                            | 1.2124  | 0.3751  |
| C                                                                 | 0.7160  | 0.6278  | -0.6224 | 0.8481                                                            | 0.1754  | -0.1221 | 0.7343                                                            | 0.3413  | 0.0270  | 0.8229                                                            | 0.0516  | -0.1198 | 0.7595                                                            | 0.1122  | -0.1273 |
| C                                                                 | 1.0248  | -1.2914 | -3.1814 | 1.1599                                                            | -0.2251 | -4.0260 | 1.4557                                                            | 1.2559  | -3.7314 | 0.9876                                                            | -0.0421 | -4.0546 | 1.0575                                                            | -0.2915 | -4.0323 |
| C                                                                 | 1.1822  | 0.2192  | -3.1774 | 1.5308                                                            | -0.3601 | -2.5597 | 1.7068                                                            | 0.6992  | -2.3413 | 1.3555                                                            | -0.3655 | -2.6175 | 1.3594                                                            | -0.5137 | -2.5613 |
| C                                                                 | 0.3537  | 0.9552  | -2.1065 | 0.5081                                                            | 0.3244  | -1.6376 | 0.4704                                                            | 0.8179  | -1.4348 | 0.4946                                                            | 0.4068  | -1.6032 | 0.3985                                                            | 0.2547  | -1.6384 |
| C                                                                 | -1.3328 | 1.9686  | 0.1819  | -1.4752                                                           | 1.1007  | 0.4942  | -1.7946                                                           | 0.4005  | 0.5128  | -1.2612                                                           | 1.3459  | 0.6633  | -1.5001                                                           | 1.1567  | 0.5326  |
| C                                                                 | -2.1526 | 1.1726  | 3.2920  | -2.2816                                                           | 0.3627  | 3.6188  | -2.5531                                                           | -1.3851 | 3.1946  | -2.1444                                                           | 0.4705  | 3.7325  | -2.2700                                                           | 0.4773  | 3.6809  |
| C                                                                 | -0.5472 | -0.5498 | 4.1412  | -0.4074                                                           | -0.9271 | 4.6618  | -0.4553                                                           | -2.3722 | 4.1374  | -0.5476                                                           | -1.2609 | 4.5790  | -0.4406                                                           | -0.9012 | 4.6893  |
| C                                                                 | 2.0218  | -2.0688 | -2.7117 | 0.7737                                                            | -1.3122 | -4.7244 | 2.0874                                                            | 2.3797  | -4.1275 | 0.2127                                                            | -0.8961 | -4.7538 | 1.8036                                                            | 0.5811  | -4.7399 |
| C                                                                 | 2.9832  | 1.9147  | -0.9601 | 2.8124                                                            | 1.8875  | -0.4694 | 2.1194                                                            | 2.5430  | 0.4159  | 3.0713                                                            | 1.3904  | -0.3765 | 2.7820                                                            | 1.7431  | -0.5386 |
| C                                                                 | -0.2841 | -1.8058 | -3.7237 | 1.3487                                                            | 1.1506  | -4.6124 | 0.5547                                                            | 0.4237  | -4.6077 | 1.5233                                                            | 1.2661  | -4.5765 | -0.1060                                                           | -1.0773 | -4.5796 |
| O                                                                 | 0.9987  | 1.8733  | 3.3708  | 0.6522                                                            | 1.7067  | 3.7751  | -0.1649                                                           | 0.5874  | 4.1136  | 1.0045                                                            | 1.1840  | 3.9122  | 0.7361                                                            | 1.6659  | 3.7654  |
| O                                                                 | -1.5317 | 2.4405  | 3.3956  | -1.9402                                                           | 1.7361  | 3.6418  | -2.6356                                                           | -0.0364 | 3.6158  | -1.5338                                                           | 1.7383  | 3.8852  | -1.8570                                                           | 1.8308  | 3.6976  |
| C                                                                 | 2.0209  | -3.5413 | -2.6567 | 0.3946                                                            | -1.3470 | -6.1493 | 1.9594                                                            | 3.0374  | -5.4413 | -0.2200                                                           | -0.7382 | -6.1544 | 1.6554                                                            | 0.8991  | -6.1720 |
| O                                                                 | 2.2704  | -4.1632 | -1.6398 | 0.8249                                                            | -2.1814 | -6.9255 | 2.9220                                                            | 3.4060  | -6.0903 | -1.3786                                                           | -0.8704 | -6.5059 | 1.6054                                                            | 2.0410  | -6.5925 |
| O                                                                 | 1.8001  | -4.1068 | -3.8582 | -0.5334                                                           | -0.4253 | -6.4685 | 0.6794                                                            | 3.2610  | -5.7937 | 0.8076                                                            | -0.5281 | -6.9985 | 1.6770                                                            | -0.1956 | -6.9554 |
| H                                                                 | -3.3542 | -0.0480 | 0.9095  | -3.0696                                                           | -1.2400 | 1.2850  | -2.6744                                                           | -2.4048 | 0.4410  | -3.2744                                                           | -0.7041 | 1.2864  | -3.1918                                                           | -1.0963 | 1.3757  |
| H                                                                 | -3.1659 | -1.7459 | 0.5382  | -2.5150                                                           | -2.8820 | 1.0558  | -1.6448                                                           | -3.7039 | -0.1144 | -3.0609                                                           | -2.3915 | 0.8821  | -2.7261                                                           | -2.7654 | 1.1448  |
| H                                                                 | -2.9147 | -1.3528 | 2.9589  | -2.4910                                                           | -2.2818 | 3.4470  | -1.9591                                                           | -3.8270 | 2.3279  | -2.8789                                                           | -2.0505 | 3.3170  | -2.6173                                                           | -2.1541 | 3.5307  |
| H                                                                 | -1.4777 | -2.0582 | 2.2388  | -0.9011                                                           | -2.7194 | 2.8460  | -0.2744                                                           | -3.6357 | 1.8739  | -1.4178                                                           | -2.7290 | 2.6202  | -1.0657                                                           | -2.6749 | 2.8969  |

|   |         |         |         |         |         |         |         |         |         |         |         |         |         |         |         |
|---|---------|---------|---------|---------|---------|---------|---------|---------|---------|---------|---------|---------|---------|---------|---------|
| H | 0.5233  | -0.5469 | 1.7438  | 0.7731  | -0.8573 | 2.3171  | 0.8056  | -1.3249 | 2.0856  | 0.5843  | -1.1869 | 2.2103  | 0.6881  | -0.9018 | 2.3181  |
| H | -1.9793 | -0.3357 | -1.0693 | -1.5478 | -1.3712 | -0.6070 | -1.0591 | -1.5813 | -1.1794 | -1.8411 | -0.9412 | -0.6629 | -1.7223 | -1.3152 | -0.5492 |
| H | -0.9088 | -1.4529 | -0.2424 | -0.3221 | -2.1745 | 0.3560  | 0.2822  | -2.2697 | -0.2839 | -0.7825 | -2.0608 | 0.1743  | -0.5164 | -2.1733 | 0.3913  |
| H | 2.6807  | 2.5259  | 1.6197  | 2.2503  | 2.5886  | 2.0447  | 1.2087  | 2.3203  | 2.9155  | 2.7029  | 1.9239  | 2.2131  | 2.3167  | 2.4771  | 1.9856  |
| H | 1.1190  | -0.3929 | -0.5923 | 1.4541  | -0.7367 | -0.0139 | 1.5748  | -0.3682 | -0.0113 | 1.2412  | -0.9662 | -0.1158 | 1.3256  | -0.8254 | -0.0184 |
| H | 2.2393  | 0.4862  | -3.0922 | 1.5952  | -1.4207 | -2.2833 | 1.9990  | -0.3553 | -2.4275 | 1.2315  | -1.4415 | -2.4366 | 1.2987  | -1.5882 | -2.3448 |
| H | 0.8796  | 0.5934  | -4.1647 | 2.5364  | 0.0445  | -2.4183 | 2.5647  | 1.2041  | -1.8888 | 2.4214  | -0.1654 | -2.4805 | 2.3970  | -0.2348 | -2.3562 |
| H | 0.4457  | 2.0356  | -2.2779 | 0.4004  | 1.3848  | -1.8965 | 0.0901  | 1.8472  | -1.4394 | 0.5838  | 1.4884  | -1.7597 | 0.3570  | 1.3132  | -1.9242 |
| H | -0.6956 | 0.7315  | -2.3137 | -0.4609 | -0.1281 | -1.8679 | -0.3159 | 0.2189  | -1.9012 | -0.5460 | 0.1677  | -1.8406 | -0.6035 | -0.1335 | -1.8353 |
| H | -0.7293 | 2.8235  | 0.5010  | -2.4154 | 0.9628  | 1.0268  | -1.7298 | 1.3290  | 1.0877  | -0.6779 | 2.1996  | 1.0209  | -2.4362 | 1.0665  | 1.0823  |
| H | -1.6321 | 2.1569  | -0.8540 | -1.0821 | 2.0831  | 0.7721  | -1.9998 | 0.6809  | -0.5252 | -1.5338 | 1.5571  | -0.3757 | -1.0544 | 2.1191  | 0.8007  |
| H | -2.2582 | 1.9897  | 0.7563  | -1.7492 | 1.1535  | -0.5643 | -2.6855 | -0.1293 | 0.8478  | -2.2024 | 1.3414  | 1.2116  | -1.7893 | 1.2210  | -0.5211 |
| H | -2.6037 | 0.9476  | 4.2661  | -2.7271 | 0.1183  | 4.5908  | -2.9704 | -2.0061 | 3.9966  | -2.6194 | 0.2175  | 4.6883  | -2.7097 | 0.2558  | 4.6610  |
| H | -2.9970 | 1.2921  | 2.6101  | -3.0955 | 0.2537  | 2.8990  | -3.2483 | -1.4961 | 2.3599  | -2.9714 | 0.6023  | 3.0317  | -3.1016 | 0.4114  | 2.9762  |
| H | 0.1881  | -1.3268 | 3.9038  | 0.4847  | -1.5462 | 4.5147  | 0.5878  | -2.6631 | 3.9696  | 0.2016  | -2.0244 | 4.3410  | 0.4161  | -1.5646 | 4.5257  |
| H | -0.0443 | 0.2203  | 4.7315  | -0.1086 | -0.0316 | 5.2125  | -0.4723 | -1.6253 | 4.9352  | -0.0683 | -0.5019 | 5.2025  | -0.0854 | -0.0196 | 5.2288  |
| H | -1.2984 | -1.0057 | 4.7978  | -1.0842 | -1.4865 | 5.3193  | -0.9786 | -3.2549 | 4.5251  | -1.3110 | -1.7409 | 5.2035  | -1.1294 | -1.4234 | 5.3647  |
| H | 2.9081  | -1.6321 | -2.2599 | 0.7647  | -2.2979 | -4.2674 | 2.8105  | 2.8730  | -3.4839 | -0.2137 | -1.7774 | -4.2823 | 2.5691  | 1.1818  | -4.2563 |
| H | 2.6354  | 2.5242  | -1.7985 | 3.3835  | 2.6738  | 0.0378  | 1.6507  | 3.0972  | -0.4016 | 2.7272  | 1.9995  | -1.2166 | 3.3912  | 2.5149  | -0.0539 |
| H | 3.7355  | 2.5100  | -0.4297 | 3.5283  | 1.1089  | -0.7489 | 2.3868  | 3.2803  | 1.1816  | 3.7899  | 2.0022  | 0.1810  | 3.4649  | 0.9385  | -0.8265 |
| H | 3.4963  | 1.0265  | -1.3405 | 2.3928  | 2.3385  | -1.3727 | 3.0560  | 2.0998  | 0.0652  | 3.6222  | 0.5243  | -0.7550 | 2.3576  | 2.1988  | -1.4371 |
| H | -0.3473 | -1.6083 | -4.7985 | 0.5441  | 1.8176  | -4.2884 | -0.4903 | 0.5479  | -4.3079 | 2.6106  | 1.2075  | -4.6889 | 0.1434  | -2.1427 | -4.6117 |
| H | -0.4207 | -2.8791 | -3.5672 | 2.3034  | 1.5758  | -4.2842 | 0.6396  | 0.6795  | -5.6675 | 1.0951  | 1.5494  | -5.5415 | -0.9905 | -0.9505 | -3.9479 |
| H | -1.1290 | -1.3134 | -3.2343 | 1.3708  | 1.1462  | -5.7057 | 0.8154  | -0.6368 | -4.5224 | 1.2936  | 2.0821  | -3.8843 | -0.3980 | -0.7653 | -5.5857 |
| H | -0.6776 | 2.3304  | 3.8650  | -1.1150 | 1.8424  | 4.1612  | -1.9153 | 0.1326  | 4.2597  | -0.6948 | 1.6223  | 4.3794  | -1.0140 | 1.8935  | 4.1947  |
| H | 1.7067  | -3.4526 | -4.5756 | -0.8384 | 0.0908  | -5.6995 | 0.0423  | 2.9927  | -5.1060 | 1.6752  | -0.5482 | -6.5538 | 1.8209  | -1.0194 | -6.4539 |

| (4 <i>S</i> *,5 <i>R</i> *,9 <i>S</i> *,10 <i>R</i> *)-6F |         |         |         |
|-----------------------------------------------------------|---------|---------|---------|
| C                                                         | -2.1124 | -2.2946 | 0.6529  |
| C                                                         | -1.7875 | -2.5414 | 2.1163  |
| C                                                         | -1.5534 | -1.2396 | 2.9310  |
| C                                                         | -0.4850 | -0.3693 | 2.1712  |
| C                                                         | -0.6384 | -0.1808 | 0.6164  |
| C                                                         | -0.9746 | -1.5497 | -0.0360 |
| C                                                         | -0.1829 | 0.9934  | 2.7840  |
| C                                                         | 0.8615  | 1.8087  | 2.1228  |
| C                                                         | 1.3317  | 1.4989  | 0.9011  |
| C                                                         | 0.7735  | 0.3334  | 0.0644  |
| C                                                         | 1.9501  | 0.5060  | -3.6880 |
| C                                                         | 2.0253  | 0.2286  | -2.1969 |
| C                                                         | 0.7362  | 0.6375  | -1.4645 |
| C                                                         | -1.7520 | 0.8326  | 0.2358  |
| C                                                         | -2.9243 | -0.5513 | 3.1847  |
| C                                                         | -0.9673 | -1.6906 | 4.2979  |
| C                                                         | 1.9041  | -0.5208 | -4.5611 |
| C                                                         | 2.4926  | 2.2974  | 0.3671  |
| C                                                         | 2.0266  | 1.9607  | -4.0757 |
| O                                                         | -0.7197 | 1.4360  | 3.7946  |
| O                                                         | -2.9582 | 0.2693  | 4.3436  |
| C                                                         | 1.8433  | -0.4172 | -6.0312 |
| O                                                         | 2.5587  | -1.0721 | -6.7679 |
| O                                                         | 0.8637  | 0.4008  | -6.4601 |
| H                                                         | -3.0573 | -1.7511 | 0.5534  |
| H                                                         | -2.2587 | -3.2593 | 0.1522  |
| H                                                         | -2.5909 | -3.1368 | 2.5688  |
| H                                                         | -0.8885 | -3.1717 | 2.1636  |
| H                                                         | 0.4546  | -0.9326 | 2.3065  |

| (4 <i>S</i> *,5 <i>R</i> *,9 <i>S</i> *,10 <i>R</i> *)-6G |         |         |
|-----------------------------------------------------------|---------|---------|
| -2.1735                                                   | -2.3308 | 0.7254  |
| -1.9458                                                   | -2.4802 | 2.2241  |
| -1.6907                                                   | -1.1318 | 2.9523  |
| -0.5294                                                   | -0.3793 | 2.2049  |
| -0.6737                                                   | -0.2181 | 0.6517  |
| -1.0147                                                   | -1.6109 | 0.0445  |
| -0.0895                                                   | 0.9405  | 2.8368  |
| 0.8948                                                    | 1.7631  | 2.1003  |
| 1.3099                                                    | 1.4512  | 0.8605  |
| 0.7331                                                    | 0.2675  | 0.0683  |
| 1.9999                                                    | 0.3068  | -3.7179 |
| 1.9468                                                    | 0.0780  | -2.2119 |
| 0.6730                                                    | 0.5274  | -1.4704 |
| -1.7801                                                   | 0.7957  | 0.2656  |
| -3.0452                                                   | -0.3812 | 3.0897  |
| -1.2296                                                   | -1.5129 | 4.3885  |
| 0.9843                                                    | 0.8404  | -4.4279 |
| 2.4290                                                    | 2.2683  | 0.2680  |
| 3.2891                                                    | -0.1819 | -4.3380 |
| -0.4346                                                   | 1.3179  | 3.9555  |
| -2.9297                                                   | 1.0138  | 3.3003  |
| 0.9831                                                    | 1.0907  | -5.8823 |
| 0.0897                                                    | 0.7120  | -6.6181 |
| 2.0208                                                    | 1.8518  | -6.2792 |
| -3.1154                                                   | -1.8116 | 0.5232  |
| -2.2804                                                   | -3.3285 | 0.2822  |
| -2.8080                                                   | -2.9952 | 2.6674  |
| -1.0842                                                   | -3.1458 | 2.3729  |
| 0.3528                                                    | -1.0272 | 2.3493  |

| (4 <i>S</i> *,5 <i>R</i> *,9 <i>S</i> *,10 <i>R</i> *)-6H |         |         |
|-----------------------------------------------------------|---------|---------|
| -2.1605                                                   | -1.3748 | 2.0302  |
| -1.6610                                                   | -0.8021 | 3.3455  |
| -1.2880                                                   | 0.7040  | 3.2686  |
| -0.3002                                                   | 0.9060  | 2.0604  |
| -0.6442                                                   | 0.2185  | 0.6871  |
| -1.0978                                                   | -1.2445 | 0.9450  |
| 0.1147                                                    | 2.3456  | 1.7779  |
| 1.0825                                                    | 2.5615  | 0.6779  |
| 1.3859                                                    | 1.5873  | -0.1989 |
| 0.7004                                                    | 0.2087  | -0.1811 |
| 1.4699                                                    | -1.7775 | -3.4914 |
| 1.6553                                                    | -1.2704 | -2.0728 |
| 0.4841                                                    | -0.3900 | -1.6044 |
| -1.7685                                                   | 0.9523  | -0.0935 |
| -2.5947                                                   | 1.5448  | 3.2140  |
| -0.5467                                                   | 1.0277  | 4.5957  |
| 2.1096                                                    | -1.1620 | -4.5066 |
| 2.4817                                                    | 1.8528  | -1.1988 |
| 0.5344                                                    | -2.9492 | -3.6422 |
| -0.2706                                                   | 3.3184  | 2.4188  |
| -2.4577                                                   | 2.8649  | 3.7205  |
| 2.0493                                                    | -1.5344 | -5.9319 |
| 1.8269                                                    | -0.7265 | -6.8157 |
| 2.3549                                                    | -2.8277 | -6.1477 |
| -3.0947                                                   | -0.8909 | 1.7283  |
| -2.3959                                                   | -2.4368 | 2.1699  |
| -2.4177                                                   | -0.9696 | 4.1225  |
| -0.7819                                                   | -1.3832 | 3.6573  |
| 0.6329                                                    | 0.4260  | 2.4026  |

| (4 <i>S</i> *,5 <i>R</i> *,9 <i>S</i> *,10 <i>R</i> *)-6I |         |         |
|-----------------------------------------------------------|---------|---------|
| -2.2517                                                   | -1.8364 | -0.4763 |
| -3.2325                                                   | -0.7131 | -0.1680 |
| -2.9047                                                   | 0.6161  | -0.9018 |
| -1.4049                                                   | 0.9853  | -0.6061 |
| -0.3345                                                   | -0.1325 | -0.8608 |
| -0.8145                                                   | -1.4372 | -0.1608 |
| -0.9312                                                   | 2.3154  | -1.1890 |
| 0.5050                                                    | 2.6474  | -1.0713 |
| 1.4085                                                    | 1.7777  | -0.5877 |
| 1.0437                                                    | 0.3363  | -0.1954 |
| 2.6647                                                    | -1.3616 | 1.9834  |
| 3.2319                                                    | -0.8298 | 0.6813  |
| 2.1978                                                    | -0.6859 | -0.4521 |
| -0.1202                                                   | -0.4119 | -2.3694 |
| -3.3154                                                   | 0.4700  | -2.3940 |
| -3.8425                                                   | 1.6846  | -0.2697 |
| 2.5804                                                    | -0.5624 | 3.0652  |
| 2.8134                                                    | 2.2754  | -0.3736 |
| 2.2609                                                    | -2.8143 | 1.9714  |
| -1.6802                                                   | 3.1629  | -1.6726 |
| -2.6895                                                   | 1.3856  | -3.2739 |
| 1.9782                                                    | -0.9768 | 4.3477  |
| 0.9235                                                    | -1.5744 | 4.4573  |
| 2.7391                                                    | -0.5875 | 5.3887  |
| -2.3373                                                   | -2.1548 | -1.5198 |
| -2.5163                                                   | -2.7135 | 0.1270  |
| -4.2481                                                   | -1.0461 | -0.4186 |
| -3.2267                                                   | -0.5438 | 0.9177  |
| -1.3789                                                   | 1.1702  | 0.4820  |

| (4 <i>S</i> *,5 <i>R</i> *,9 <i>S</i> *,10 <i>R</i> *)-6J |         |         |
|-----------------------------------------------------------|---------|---------|
| -2.3314                                                   | -1.6469 | -0.4243 |
| -3.1918                                                   | -0.5010 | 0.0801  |
| -2.8873                                                   | 0.8573  | -0.6097 |
| -1.3389                                                   | 1.1218  | -0.5131 |
| -0.3523                                                   | -0.0539 | -0.8618 |
| -0.8537                                                   | -1.3592 | -0.1850 |
| -0.8368                                                   | 2.3812  | -1.2094 |
| 0.6068                                                    | 2.6863  | -1.0847 |
| 1.4837                                                    | 1.7786  | -0.6197 |
| 1.0789                                                    | 0.3384  | -0.2572 |
| 2.7043                                                    | -1.4653 | 1.8083  |
| 3.2433                                                    | -0.9657 | 0.4799  |
| 2.1757                                                    | -0.7158 | -0.6041 |
| -0.2265                                                   | -0.3074 | -2.3884 |
| -3.4783                                                   | 0.8343  | -2.0475 |
| -3.6428                                                   | 1.9350  | 0.2166  |
| 2.1253                                                    | -2.6806 | 1.8875  |
| 2.9054                                                    | 2.2203  | -0.3936 |
| 2.8446                                                    | -0.5012 | 2.9578  |
| -1.5488                                                   | 3.1652  | -1.8293 |
| -3.7907                                                   | 2.1179  | -2.5703 |
| 1.5471                                                    | -3.2877 | 3.0991  |
| 0.4201                                                    | -3.7482 | 3.1304  |
| 2.4206                                                    | -3.3455 | 4.1214  |
| -2.5293                                                   | -1.8419 | -1.4830 |
| -2.6055                                                   | -2.5626 | 0.1134  |
| -4.2504                                                   | -0.7636 | -0.0422 |
| -3.0326                                                   | -0.4072 | 1.1635  |
| -1.1766                                                   | 1.3317  | 0.5583  |

|   |         |         |         |         |         |         |         |         |         |         |         |         |         |         |         |
|---|---------|---------|---------|---------|---------|---------|---------|---------|---------|---------|---------|---------|---------|---------|---------|
| H | -1.2453 | -1.4282 | -1.0904 | -1.2583 | -1.5292 | -1.0199 | -1.4957 | -1.7010 | 0.0322  | -0.1751 | -2.2846 | -0.4286 | -0.2843 | -2.2278 | -0.5330 |
| H | -0.0834 | -2.1911 | -0.0201 | -0.1298 | -2.2584 | 0.1069  | -0.2299 | -1.8503 | 1.2377  | -0.7279 | -1.3162 | 0.9273  | -0.6879 | -1.2960 | 0.8985  |
| H | 1.2384  | 2.6395  | 2.7103  | 1.2952  | 2.6019  | 2.6607  | 1.5475  | 3.5417  | 0.6591  | 0.7601  | 3.6633  | -1.3552 | 0.8891  | 3.6974  | -1.3590 |
| H | 1.4857  | -0.4925 | 0.2122  | 1.4422  | -0.5585 | 0.2295  | 1.4048  | -0.4552 | 0.3427  | 0.8656  | 0.3742  | 0.8876  | 0.9546  | 0.3460  | 0.8335  |
| H | 2.2029  | -0.8405 | -2.0209 | 2.0776  | -0.9976 | -2.0330 | 1.7637  | -2.1303 | -1.3991 | 3.7479  | 0.1184  | 0.8530  | 3.8520  | -0.0712 | 0.6392  |
| H | 2.9000  | 0.7448  | -1.7927 | 2.8201  | 0.5741  | -1.7794 | 2.6007  | -0.7248 | -2.0018 | 4.0189  | -1.5178 | 0.3447  | 3.9489  | -1.7154 | 0.0957  |
| H | 0.5169  | 1.6993  | -1.6308 | 0.4676  | 1.5870  | -1.6657 | 0.2943  | 0.4106  | -2.3305 | 2.7283  | -0.4177 | -1.3750 | 2.6854  | -0.4279 | -1.5328 |
| H | -0.0776 | 0.0914  | -1.9510 | -0.1555 | -0.0255 | -1.9209 | -0.4095 | -1.0185 | -1.6263 | 1.8010  | -1.6874 | -0.6388 | 1.7246  | -1.6879 | -0.8221 |
| H | -1.6374 | 1.7965  | 0.7395  | -2.7725 | 0.4728  | 0.5777  | -1.9056 | 0.5346  | -1.0959 | 0.1867  | 0.4831  | -2.9187 | 0.0316  | 0.5963  | -2.9475 |
| H | -1.7635 | 1.0376  | -0.8394 | -1.6062 | 1.7851  | 0.6989  | -2.7427 | 0.8551  | 0.3859  | 0.6523  | -1.1699 | -2.5342 | 0.5457  | -1.0498 | -2.6135 |
| H | -2.7514 | 0.4598  | 0.4597  | -1.8482 | 0.9289  | -0.8187 | -1.5679 | 2.0196  | -0.2218 | -1.0139 | -0.8020 | -2.8550 | -1.1397 | -0.7146 | -2.8220 |
| H | -3.7000 | -1.3095 | 3.3408  | -3.6277 | -0.7922 | 3.9232  | -3.3686 | 1.0740  | 3.8307  | -4.3992 | 0.5961  | -2.5060 | -4.4227 | 0.2784  | -2.0545 |
| H | -3.2565 | 0.0551  | 2.3462  | -3.6775 | -0.5147 | 2.2095  | -3.0088 | 1.6215  | 2.2120  | -3.1055 | -0.5295 | -2.7801 | -2.8294 | 0.3395  | -2.7655 |
| H | -0.0462 | -2.2699 | 4.1641  | -0.2409 | -1.9854 | 4.3786  | 0.3327  | 0.3865  | 4.7267  | -3.5655 | 1.8947  | 0.7695  | -3.3297 | 1.9227  | 1.2671  |
| H | -0.7223 | -0.8466 | 4.9490  | -1.1842 | -0.6514 | 5.0595  | -0.1965 | 2.0630  | 4.6400  | -3.8348 | 2.6302  | -0.8178 | -3.4698 | 2.9485  | -0.1567 |
| H | -1.6790 | -2.3280 | 4.8356  | -1.9248 | -2.2279 | 4.8455  | -1.2029 | 0.8630  | 5.4584  | -4.8828 | 1.3367  | -0.2629 | -4.7240 | 1.7547  | 0.1956  |
| H | 1.9642  | -1.5504 | -4.2193 | 0.0309  | 1.0910  | -3.9751 | 2.6974  | -0.2646 | -4.3344 | 2.9095  | 0.4702  | 3.0243  | 1.9855  | -3.2948 | 1.0025  |
| H | 2.2319  | 2.8052  | -0.5655 | 2.1262  | 2.7450  | -0.6680 | 2.8998  | 2.8607  | -1.0944 | 2.9301  | 3.3247  | -0.6684 | 3.0506  | 3.2811  | -0.6282 |
| H | 2.8171  | 3.0740  | 1.0693  | 2.7527  | 3.0725  | 0.9389  | 3.3079  | 1.1514  | -1.0489 | 3.0771  | 2.2162  | 0.6866  | 3.1795  | 2.0891  | 0.6573  |
| H | 3.3539  | 1.6442  | 0.1982  | 3.3041  | 1.6367  | 0.0892  | 2.1158  | 1.7691  | -2.2256 | 3.5336  | 1.7029  | -0.9643 | 3.5997  | 1.6594  | -1.0254 |
| H | 1.0728  | 2.4592  | -3.8783 | 4.1176  | 0.4705  | -4.0444 | -0.4174 | -2.7520 | -3.1395 | 1.3125  | -2.9454 | 1.4439  | 3.8962  | -0.4177 | 3.2501  |
| H | 2.8075  | 2.4673  | -3.4982 | 3.5118  | -1.1982 | -3.9950 | 0.2926  | -3.1726 | -4.6846 | 3.0235  | -3.4146 | 1.4635  | 2.4890  | 0.4932  | 2.6695  |
| H | 2.2773  | 2.1059  | -5.1302 | 3.2555  | -0.2237 | -5.4298 | 0.9797  | -3.8440 | -3.1959 | 2.1551  | -3.2371 | 2.9741  | 2.2665  | -0.7960 | 3.8375  |
| H | -2.1993 | 0.8905  | 4.2986  | -2.2445 | 1.1693  | 3.9844  | -1.6946 | 3.2857  | 3.2683  | -2.7166 | 2.2766  | -2.8652 | -2.9995 | 2.6892  | -2.4649 |
| H | 0.3228  | 0.7618  | -5.7337 | 2.5867  | 2.1383  | -5.5385 | 2.6007  | -3.3023 | -5.3321 | 3.6013  | -0.2102 | 5.1347  | 3.3059  | -3.0109 | 3.8858  |

| <b>(4S*,5R*,9S*,10R*)-6K</b> |         |         |         |
|------------------------------|---------|---------|---------|
| C                            | -2.6742 | -0.7617 | 0.6753  |
| C                            | -2.2270 | -1.0861 | 2.0948  |
| C                            | -1.3378 | 0.0159  | 2.7342  |
| C                            | -0.1520 | 0.3266  | 1.7489  |
| C                            | -0.5302 | 0.6342  | 0.2583  |
| C                            | -1.4889 | -0.4860 | -0.2432 |
| C                            | 0.8748  | 1.3383  | 2.2558  |
| C                            | 1.9335  | 1.7725  | 1.3188  |
| C                            | 1.9413  | 1.4112  | 0.0243  |
| C                            | 0.8092  | 0.5947  | -0.6155 |
| C                            | 1.2537  | -1.2738 | -3.1567 |
| C                            | 1.4051  | 0.2371  | -3.1544 |
| C                            | 0.5441  | 0.9701  | -2.1077 |
| C                            | -1.2213 | 2.0114  | 0.0989  |
| C                            | -2.2474 | 1.2084  | 3.1434  |
| C                            | -0.7796 | -0.6065 | 4.0464  |
| C                            | 0.0979  | -1.8317 | -3.5716 |
| C                            | 3.1471  | 1.7777  | -0.8005 |
| C                            | 2.4933  | -2.0400 | -2.7728 |
| O                            | 0.9283  | 1.7434  | 3.4158  |
| O                            | -1.5704 | 2.4418  | 3.2971  |
| C                            | -0.2087 | -3.2723 | -3.6419 |
| O                            | -0.7199 | -3.7914 | -4.6178 |
| O                            | 0.0459  | -3.9187 | -2.4885 |
| H                            | -3.3666 | 0.0856  | 0.6676  |
| H                            | -3.2391 | -1.6141 | 0.2784  |
| H                            | -3.1133 | -1.2684 | 2.7163  |
| H                            | -1.6730 | -2.0347 | 2.0688  |
| H                            | 0.4262  | -0.6134 | 1.7138  |



|   |         |         |         |
|---|---------|---------|---------|
| H | -1.8892 | -0.2490 | -1.2344 |
| H | -0.9241 | -1.4210 | -0.3559 |
| H | 2.7291  | 2.3563  | 1.7710  |
| H | 1.1608  | -0.4449 | -0.5887 |
| H | 2.4589  | 0.5074  | -3.0481 |
| H | 1.1235  | 0.6113  | -4.1486 |
| H | 0.6736  | 2.0513  | -2.2460 |
| H | -0.4975 | 0.7774  | -2.3792 |
| H | -0.5977 | 2.8331  | 0.4635  |
| H | -1.4571 | 2.2279  | -0.9478 |
| H | -2.1739 | 2.0664  | 0.6243  |
| H | -2.7587 | 0.9935  | 4.0896  |
| H | -3.0484 | 1.3778  | 2.4208  |
| H | -0.0688 | -1.4133 | 3.8352  |
| H | -0.2766 | 0.1279  | 4.6806  |
| H | -1.5882 | -1.0377 | 4.6493  |
| H | -0.7125 | -1.2145 | -3.9505 |
| H | 2.8746  | 2.4292  | -1.6353 |
| H | 3.9013  | 2.3155  | -0.2145 |
| H | 3.6313  | 0.8740  | -1.1829 |
| H | 2.7078  | -1.9098 | -1.7079 |
| H | 2.4163  | -3.1112 | -2.9765 |
| H | 3.3537  | -1.6758 | -3.3447 |
| H | -0.7577 | 2.2869  | 3.8238  |
| H | 0.3687  | -3.3286 | -1.7833 |

**Supplementary S5.** The Z-matrices of (2R\*,4S\*,5R\*,9S\*,10R\*)-7 optimized at B3LYP/6-31G(d)-GD3BJ level by Gaussian.

| (2R*,4S*,5R*,9S*,10R*)-7A |         |         |         | (2R*,4S*,5R*,9S*,10R*)-7B |         |         | (2R*,4S*,5R*,9S*,10R*)-7C |         |         | (2R*,4S*,5R*,9S*,10R*)-7D |         |         | (2R*,4S*,5R*,9S*,10R*)-7E |         |         |
|---------------------------|---------|---------|---------|---------------------------|---------|---------|---------------------------|---------|---------|---------------------------|---------|---------|---------------------------|---------|---------|
| C                         | -2.2338 | -0.2594 | -1.1926 | -2.1406                   | 0.2354  | -1.4603 | -2.0878                   | 0.5837  | -1.2113 | 2.0301                    | 1.1650  | -1.0620 | -2.2002                   | 0.4045  | -1.2682 |
| C                         | -1.5608 | -1.1612 | -2.2232 | -1.3793                   | -0.1897 | -2.7124 | -1.4268                   | 0.0760  | -2.4841 | 2.1071                    | 0.0523  | -2.0967 | -1.5367                   | -0.0945 | -2.5447 |
| C                         | -0.6772 | -2.2774 | -1.5908 | -0.5073                   | -1.4594 | -2.5107 | -0.8130                   | -1.3454 | -2.3321 | 0.7520                    | -0.2246 | -2.7988 | -0.8188                   | -1.4591 | -2.3726 |
| C                         | 0.3368  | -1.6007 | -0.5970 | 0.4179                    | -1.2253 | -1.2611 | 0.1542                    | -1.3416 | -1.0963 | -0.3335                   | -0.4789 | -1.6954 | 0.1680                    | -1.3471 | -1.1578 |
| C                         | -0.2718 | -0.6348 | 0.4713  | -0.2832                   | -0.7523 | 0.0577  | -0.3864                   | -0.7279 | 0.2413  | -0.4149                   | 0.5339  | -0.4969 | -0.3816                   | -0.7373 | 0.1803  |
| C                         | -1.2200 | 0.3489  | -0.2435 | -1.2028                   | 0.4505  | -0.2791 | -1.0942                   | 0.6050  | -0.0648 | 1.0150                    | 0.8249  | 0.0245  | -1.1818                   | 0.5503  | -0.1419 |
| C                         | 1.3591  | -2.5245 | 0.0678  | 1.4145                    | -2.3432 | -0.9523 | 0.8420                    | -2.6647 | -0.7649 | -1.7504                   | -0.7354 | -2.2026 | 0.9571                    | -2.6128 | -0.8314 |
| C                         | 2.2407  | -1.9387 | 1.1083  | 2.2249                    | -2.2183 | 0.2807  | 1.7607                    | -2.6657 | 0.4043  | -2.7835                   | -1.0148 | -1.1757 | 1.9008                    | -2.5372 | 0.3101  |
| C                         | 2.0761  | -0.6834 | 1.5638  | 2.0064                    | -1.2481 | 1.1854  | 1.8112                    | -1.6345 | 1.2689  | -2.5544                   | -0.8041 | 0.1335  | 1.9053                    | -1.4928 | 1.1586  |
| C                         | 0.9225  | 0.2113  | 1.0985  | 0.8468                    | -0.2495 | 1.0626  | 0.8823                    | -0.4182 | 1.1543  | -1.2490                   | -0.1826 | 0.6597  | 0.8846                    | -0.3458 | 1.0687  |
| C                         | 0.6252  | 3.3627  | 0.6866  | 0.3320                    | 2.7446  | 2.2705  | 1.1528                    | 2.6741  | 1.9279  | 0.2085                    | -0.2522 | 3.5778  | 0.9107                    | 2.7404  | 2.1304  |
| C                         | 0.9933  | 2.6632  | 1.9882  | 0.8644                    | 1.5075  | 2.9775  | 1.3080                    | 1.4933  | 2.8770  | -1.2525                   | 0.0166  | 3.2522  | 1.3042                    | 1.4747  | 2.8763  |
| C                         | 0.4294  | 1.2391  | 2.1669  | 0.2647                    | 0.1945  | 2.4421  | 0.4942                    | 0.2333  | 2.5198  | -1.4573                   | 0.7339  | 1.9056  | 0.4848                    | 0.2401  | 2.4592  |
| C                         | -1.0474 | -1.3851 | 1.5809  | -1.1214                   | -1.8777 | 0.7127  | -1.3761                   | -1.6613 | 0.9874  | -1.0874                   | 1.8778  | -0.8855 | -1.2958                   | -1.7188 | 0.9608  |
| C                         | -1.6078 | -3.3726 | -1.0029 | -1.4429                   | -2.6994 | -2.4759 | -1.9168                   | -2.4284 | -2.2677 | 0.3985                    | 0.9055  | -3.7970 | -1.8544                   | -2.6045 | -2.2506 |
| C                         | 0.1021  | -2.9201 | -2.7724 | 0.3664                    | -1.5789 | -3.7918 | 0.0058                    | -1.5949 | -3.6293 | 0.9600                    | -1.5233 | -3.6279 | -0.0065                   | -1.6823 | -3.6791 |
| C                         | -0.6602 | 3.6018  | 0.3502  | 1.1158                    | 3.4195  | 1.4055  | -0.0480                   | 3.2478  | 1.6997  | 0.6937                    | -1.5090 | 3.5207  | 1.7310                    | 3.2546  | 1.1918  |
| C                         | 3.1136  | -0.1077 | 2.4924  | 2.9908                    | -1.0932 | 2.3170  | 2.8771                    | -1.6294 | 2.3337  | -3.5914                   | -1.2678 | 1.1246  | 3.0047                    | -1.4119 | 2.1871  |
| C                         | 1.8056  | 3.7757  | -0.1569 | -1.0499                   | 3.1797  | 2.6894  | 2.4418                    | 3.1472  | 1.3033  | 0.9936                    | 0.9458  | 4.0500  | -0.3695                   | 3.3887  | 2.5941  |
| O                         | 1.5418  | -3.6944 | -0.2636 | 1.6399                    | -3.2898 | -1.7040 | 0.7127                    | -3.6970 | -1.4135 | -2.0747                   | -0.7643 | -3.3844 | 0.8995                    | -3.6535 | -1.4775 |
| O                         | -2.8588 | 0.8545  | -1.8405 | -2.7878                   | 1.4832  | -1.7079 | -2.5002                   | 1.9458  | -1.3736 | 3.2969                    | 1.2990  | -0.4188 | -2.7482                   | 1.7015  | -1.5017 |
| O                         | -1.0097 | -4.1777 | -0.0061 | -0.8967                   | -3.8313 | -1.8278 | -2.8474                   | -2.2581 | -3.3352 | 1.5067                    | 1.1842  | -4.6515 | -2.7482                   | -2.6129 | -3.3627 |
| C                         | -1.0781 | 4.3225  | -0.8684 | 0.7563                    | 4.6363  | 0.6538  | -0.2520                   | 4.4291  | 0.8383  | 2.0721                    | -1.9385 | 3.8218  | 1.5078                    | 4.4751  | 0.3945  |
| O                         | -0.6559 | 5.4207  | -1.1863 | 1.4969                    | 5.6015  | 0.5811  | 0.3671                    | 5.4720  | 0.9608  | 2.3155                    | -2.9094 | 4.5170  | 2.3780                    | 5.3116  | 0.2257  |
| O                         | -1.9985 | 3.6424  | -1.5781 | -0.4117                   | 4.5334  | -0.0062 | -1.2180                   | 4.2377  | -0.0798 | 3.0110                    | -1.2144 | 3.1861  | 0.2976                    | 4.5207  | -0.1913 |
| H                         | -3.0120 | -0.7930 | -0.6395 | -2.9205                   | -0.4864 | -1.2015 | -2.9752                   | -0.0050 | -0.9605 | 1.7979                    | 2.1261  | -1.5302 | -3.0247                   | -0.2484 | -0.9674 |
| H                         | -2.3283 | -1.5989 | -2.8757 | -2.0915                   | -0.3374 | -3.5357 | -2.1466                   | 0.1176  | -3.3113 | 2.8971                    | 0.2809  | -2.8234 | -2.2810                   | -0.1348 | -3.3505 |
| H                         | -0.9493 | -0.5342 | -2.8880 | -0.7465                   | 0.6497  | -3.0355 | -0.6402                   | 0.7885  | -2.7734 | 2.4582                    | -0.8617 | -1.5951 | -0.8140                   | 0.6648  | -2.8784 |

|   |         |         |         |
|---|---------|---------|---------|
| H | 0.9660  | -0.9675 | -1.2468 |
| H | -0.6160 | 1.0579  | -0.8250 |
| H | -1.7795 | 0.9530  | 0.4782  |
| H | 3.0565  | -2.5781 | 1.4298  |
| H | 1.3583  | 0.7886  | 0.2709  |
| H | 2.0833  | 2.6344  | 2.0981  |
| H | 0.6364  | 3.2862  | 2.8191  |
| H | 0.6737  | 0.8890  | 3.1764  |
| H | -0.6597 | 1.3276  | 2.1750  |
| H | -0.4392 | -2.1510 | 2.0708  |
| H | -1.3946 | -0.7071 | 2.3665  |
| H | -1.9459 | -1.8724 | 1.2013  |
| H | -1.9673 | -4.0393 | -1.7960 |
| H | -2.5095 | -2.9443 | -0.5597 |
| H | 0.6382  | -3.8262 | -2.4785 |
| H | -0.5811 | -3.2081 | -3.5808 |
| H | 0.8301  | -2.2206 | -3.1984 |
| H | -1.4781 | 3.2982  | 0.9935  |
| H | 3.5288  | 0.8136  | 2.0732  |
| H | 2.6921  | 0.1040  | 3.4786  |
| H | 3.9538  | -0.7946 | 2.6453  |
| H | 2.4746  | 2.9225  | -0.3128 |
| H | 1.5270  | 4.1384  | -1.1492 |
| H | 2.3689  | 4.5666  | 0.3489  |
| H | -3.4905 | 0.4942  | -2.4917 |
| H | -0.1215 | -4.4560 | -0.3165 |
| H | -2.1814 | 2.7118  | -1.3199 |

|         |         |         |
|---------|---------|---------|
| 1.0722  | -0.3885 | -1.5621 |
| -0.5845 | 1.3331  | -0.4940 |
| -1.8143 | 0.7366  | 0.5839  |
| 3.0412  | -2.9285 | 0.3650  |
| 1.3023  | 0.6355  | 0.5964  |
| 1.9575  | 1.4766  | 2.9242  |
| 0.6296  | 1.5924  | 4.0464  |
| 0.4178  | -0.5959 | 3.1865  |
| -0.8198 | 0.3248  | 2.4021  |
| -0.5234 | -2.7675 | 0.9308  |
| -1.5703 | -1.5573 | 1.6577  |
| -1.9591 | -2.1900 | 0.0895  |
| -1.7192 | -3.0020 | -3.4932 |
| -2.3900 | -2.4804 | -1.9779 |
| 0.9062  | -2.5279 | -3.8454 |
| -0.2534 | -1.5198 | -4.6949 |
| 1.1018  | -0.7687 | -3.8512 |
| 2.1456  | 3.1174  | 1.2353  |
| 3.4459  | -0.0988 | 2.2894  |
| 2.5133  | -1.2443 | 3.2886  |
| 3.8102  | -1.8181 | 2.2513  |
| -1.1421 | 3.1521  | 3.7805  |
| -1.2829 | 4.2042  | 2.3864  |
| -1.8084 | 2.5174  | 2.2633  |
| -3.4113 | 1.3519  | -2.4445 |
| 0.0179  | -3.9690 | -2.1554 |
| -0.8387 | 3.6586  | 0.0675  |

|         |         |         |
|---------|---------|---------|
| 0.9858  | -0.6893 | -1.4143 |
| -0.3343 | 1.3586  | -0.3087 |
| -1.6221 | 0.9836  | 0.8171  |
| 2.4102  | -3.5317 | 0.4785  |
| 1.4843  | 0.3198  | 0.6052  |
| 2.3666  | 1.2232  | 2.9634  |
| 1.0121  | 1.8266  | 3.8807  |
| 0.5995  | -0.4936 | 3.3335  |
| -0.5611 | 0.5162  | 2.5502  |
| -1.5497 | -1.3358 | 2.0174  |
| -2.3642 | -1.6712 | 0.5247  |
| -1.0260 | -2.6958 | 1.0428  |
| -2.4949 | -2.3864 | -1.3484 |
| -1.5003 | -3.4355 | -2.3563 |
| 0.4287  | -2.6035 | -3.6602 |
| -0.6178 | -1.4774 | -4.5231 |
| 0.8364  | -0.8854 | -3.7187 |
| -0.9492 | 2.8833  | 2.1790  |
| 3.4817  | -0.7204 | 2.2605  |
| 2.4406  | -1.6901 | 3.3341  |
| 3.5629  | -2.4781 | 2.2314  |
| 2.9676  | 2.3050  | 0.8406  |
| 2.2981  | 3.8936  | 0.5184  |
| 3.0927  | 3.5802  | 2.0698  |
| -3.0821 | 1.9716  | -2.1579 |
| -3.3763 | -3.0741 | -3.3817 |
| -1.5707 | 3.3273  | -0.1969 |

|         |         |         |
|---------|---------|---------|
| -0.0362 | -1.4438 | -1.2494 |
| 1.3884  | -0.0463 | 0.5801  |
| 1.0124  | 1.6451  | 0.7518  |
| -3.7061 | -1.4418 | -1.5550 |
| -0.6485 | -1.0448 | 0.9823  |
| -1.8283 | -0.9142 | 3.2789  |
| -1.6749 | 0.6399  | 4.0509  |
| -2.4638 | 1.1693  | 1.8855  |
| -0.7834 | 1.5947  | 1.8909  |
| -1.2932 | 2.5010  | -0.0101 |
| -0.4513 | 2.4933  | -1.5218 |
| -2.0408 | 1.7406  | -1.4031 |
| 0.1492  | 1.8412  | -3.3044 |
| -0.4423 | 0.6306  | -4.4392 |
| 0.0765  | -1.7770 | -4.2214 |
| 1.8003  | -1.4213 | -4.3244 |
| 1.1794  | -2.3793 | -2.9796 |
| 0.0430  | -2.3464 | 3.2836  |
| -4.4435 | -1.7505 | 0.6325  |
| -3.1589 | -2.0065 | 1.8061  |
| -3.9925 | -0.4332 | 1.7054  |
| 0.4103  | 1.5194  | 4.7783  |
| 1.9267  | 0.6717  | 4.5499  |
| 1.2365  | 1.6023  | 3.2099  |
| 3.9532  | 1.4893  | -1.1138 |
| 1.1698  | 1.7363  | -5.3791 |
| 2.6534  | -0.5345 | 2.5838  |

|         |         |         |
|---------|---------|---------|
| 0.9419  | -0.6422 | -1.5079 |
| -0.4862 | 1.3559  | -0.4143 |
| -1.7112 | 0.9198  | 0.7438  |
| 2.6122  | -3.3542 | 0.3735  |
| 1.4135  | 0.4453  | 0.5188  |
| 2.3748  | 1.2779  | 2.7588  |
| 1.1588  | 1.6477  | 3.9504  |
| 0.5856  | -0.5301 | 3.2334  |
| -0.5704 | 0.5246  | 2.4896  |
| -1.5143 | -1.3600 | 1.9710  |
| -2.2722 | -1.8422 | 0.4927  |
| -0.8531 | -2.7127 | 1.0702  |
| -2.4850 | -2.4972 | -1.3722 |
| -1.3903 | -3.5923 | -2.1946 |
| 0.4415  | -2.6794 | -3.7189 |
| -0.6392 | -1.5760 | -4.5678 |
| 0.8031  | -0.9496 | -3.7749 |
| 2.6961  | 2.7991  | 0.9870  |
| 3.5876  | -0.4969 | 2.0461  |
| 2.6048  | -1.4312 | 3.2042  |
| 3.7059  | -2.2504 | 2.1061  |
| -0.4072 | 3.4155  | 3.6885  |
| -0.4671 | 4.4245  | 2.2573  |
| -1.2371 | 2.8292  | 2.2335  |
| -3.4110 | 1.6098  | -2.2104 |
| -2.3036 | -3.0953 | -4.0823 |
| -0.2507 | 3.7267  | -0.0433 |

| (2 <i>R</i> *,4 <i>S</i> *,5 <i>R</i> *,9 <i>S</i> *,10 <i>R</i> *)-7 <b>F</b> |         |         |         |
|--------------------------------------------------------------------------------|---------|---------|---------|
| C                                                                              | 2.6778  | 0.8501  | -1.2788 |
| C                                                                              | 2.8194  | -0.1771 | -2.3977 |
| C                                                                              | 1.4798  | -0.5119 | -3.1072 |
| C                                                                              | 0.4272  | -0.9135 | -2.0091 |
| C                                                                              | 0.2519  | 0.0710  | -0.8015 |
| C                                                                              | 1.6608  | 0.4015  | -0.2331 |
| C                                                                              | -0.9387 | -1.3507 | -2.5372 |
| C                                                                              | -2.0077 | -1.6100 | -1.5485 |
| C                                                                              | -1.8546 | -1.3464 | -0.2393 |
| C                                                                              | -0.5956 | -0.6743 | 0.3292  |
| C                                                                              | -1.0666 | 0.4581  | 4.0701  |
| C                                                                              | -0.8213 | -0.4768 | 2.8991  |
| C                                                                              | -0.8920 | 0.2540  | 1.5477  |
| C                                                                              | -0.4576 | 1.3856  | -1.2116 |
| C                                                                              | 1.1102  | 0.6731  | -4.0428 |
| C                                                                              | 1.7807  | -1.7378 | -4.0162 |
| C                                                                              | -0.0627 | 0.7435  | 4.9242  |
| C                                                                              | -2.9439 | -1.7940 | 0.7012  |
| C                                                                              | -2.4886 | 0.9328  | 4.2278  |
| O                                                                              | -1.1773 | -1.5781 | -3.7221 |
| O                                                                              | 3.9360  | 0.9973  | -0.6235 |
| O                                                                              | -0.2630 | 0.7611  | -4.3691 |
| C                                                                              | -0.1500 | 1.6195  | 6.1075  |
| O                                                                              | 0.2718  | 1.2943  | 7.2028  |
| O                                                                              | -0.6626 | 2.8320  | 5.8237  |
| H                                                                              | 2.4078  | 1.8342  | -1.6721 |
| H                                                                              | 3.5624  | 0.1791  | -3.1244 |
| H                                                                              | 3.2572  | -1.0928 | -1.9744 |
| H                                                                              | 0.8315  | -1.8429 | -1.5713 |

| (2 <i>R</i> *,4 <i>S</i> *,5 <i>R</i> *,9 <i>S</i> *,10 <i>R</i> *)-7 <b>G</b> |         |         |
|--------------------------------------------------------------------------------|---------|---------|
| -2.1661                                                                        | 0.1847  | -1.3196 |
| -1.3566                                                                        | -0.1032 | -2.5756 |
| -0.4464                                                                        | -1.3622 | -2.4620 |
| 0.4309                                                                         | -1.2205 | -1.1630 |
| -0.2882                                                                        | -0.7970 | 0.1656  |
| -1.2490                                                                        | 0.3691  | -0.1267 |
| 1.3622                                                                         | -2.3831 | -0.8322 |
| 2.2194                                                                         | -2.2368 | 0.3720  |
| 2.0114                                                                         | -1.2570 | 1.2717  |
| 0.8431                                                                         | -0.2685 | 1.1575  |
| 0.4185                                                                         | 2.7615  | 2.0774  |
| 0.7748                                                                         | 1.5919  | 2.9849  |
| 0.2649                                                                         | 0.2106  | 2.5269  |
| -1.0900                                                                        | -1.9518 | 0.8221  |
| -1.3345                                                                        | -2.6337 | -2.5330 |
| 0.4785                                                                         | -1.3356 | -3.7096 |
| -0.8648                                                                        | 3.0841  | 1.8087  |
| 3.0104                                                                         | -1.0660 | 2.3834  |
| 1.6062                                                                         | 3.5221  | 1.5423  |
| 1.4565                                                                         | -3.4033 | -1.5071 |
| -2.8624                                                                        | 1.4280  | -1.4518 |
| -0.6531                                                                        | -3.7981 | -2.9714 |
| -1.2745                                                                        | 4.2371  | 0.9829  |
| -0.8896                                                                        | 5.3781  | 1.1709  |
| -2.1419                                                                        | 3.8918  | 0.0125  |
| -2.9095                                                                        | -0.5969 | -1.1368 |
| -2.0353                                                                        | -0.1905 | -3.4346 |
| -0.7420                                                                        | 0.7808  | -2.8002 |
| 1.1221                                                                         | -0.3952 | -1.4067 |

| (2 <i>R</i> *,4 <i>S</i> *,5 <i>R</i> *,9 <i>S</i> *,10 <i>R</i> *)-7 <b>H</b> |         |         |
|--------------------------------------------------------------------------------|---------|---------|
| -2.2583                                                                        | -0.5307 | -2.1504 |
| -1.5066                                                                        | -1.4022 | -3.1517 |
| -0.5342                                                                        | -2.4141 | -2.4879 |
| 0.4069                                                                         | -1.6225 | -1.5065 |
| -0.2876                                                                        | -0.6706 | -0.4721 |
| -1.2984                                                                        | 0.2285  | -1.2387 |
| 1.4860                                                                         | -2.4560 | -0.8161 |
| 2.3103                                                                         | -1.7940 | 0.2183  |
| 2.0538                                                                         | -0.5481 | 0.6528  |
| 0.8357                                                                         | 0.2600  | 0.1792  |
| 0.3455                                                                         | 3.4787  | 2.3888  |
| 0.8725                                                                         | 2.6064  | 1.2632  |
| 0.2548                                                                         | 1.1984  | 1.2818  |
| -1.0341                                                                        | -1.4520 | 0.6379  |
| -1.3717                                                                        | -3.5755 | -1.8833 |
| 0.3078                                                                         | -3.0124 | -3.6509 |
| 1.1614                                                                         | 3.8279  | 3.4042  |
| 3.0470                                                                         | 0.0882  | 1.5915  |
| -1.0712                                                                        | 3.9651  | 2.2183  |
| 1.7631                                                                         | -3.6138 | -1.1250 |
| -3.0313                                                                        | 0.4325  | -2.8639 |
| -0.7246                                                                        | -4.2950 | -0.8520 |
| 0.8088                                                                         | 4.6716  | 4.5614  |
| 1.5145                                                                         | 5.5854  | 4.9497  |
| -0.3134                                                                        | 4.2662  | 5.1851  |
| -2.9594                                                                        | -1.1215 | -1.5543 |
| -2.2304                                                                        | -1.9256 | -3.7913 |
| -0.9514                                                                        | -0.7442 | -3.8360 |
| 0.9923                                                                         | -0.9587 | -2.1665 |

| (2 <i>R</i> *,4 <i>S</i> *,5 <i>R</i> *,9 <i>S</i> *,10 <i>R</i> *)-7 <b>I</b> |         |         |
|--------------------------------------------------------------------------------|---------|---------|
| -2.3622                                                                        | 0.6182  | -1.2606 |
| -1.9103                                                                        | -0.0969 | -2.5302 |
| -1.3367                                                                        | -1.5163 | -2.2716 |
| -0.2142                                                                        | -1.4011 | -1.1753 |
| -0.5879                                                                        | -0.6435 | 0.1462  |
| -1.2360                                                                        | 0.7177  | -0.2355 |
| 0.5242                                                                         | -2.6993 | -0.8486 |
| 1.4991                                                                         | -2.6749 | 0.2642  |
| 1.6484                                                                         | -1.6051 | 1.0643  |
| 0.7606                                                                         | -0.3569 | 0.9511  |
| 1.4274                                                                         | 2.6792  | 1.8417  |
| 1.5066                                                                         | 1.4332  | 2.7077  |
| 0.4946                                                                         | 0.3354  | 2.3260  |
| -1.5695                                                                        | -1.4534 | 1.0293  |
| -2.5199                                                                        | -2.4794 | -1.9740 |
| -0.7062                                                                        | -1.9669 | -3.6203 |
| 2.3542                                                                         | 2.8927  | 0.8859  |
| 2.7829                                                                         | -1.6164 | 2.0562  |
| 0.2638                                                                         | 3.5944  | 2.1290  |
| 0.4212                                                                         | -3.7342 | -1.5051 |
| -2.7988                                                                        | 1.9343  | -1.5956 |
| -2.1609                                                                        | -3.6496 | -1.2639 |
| 2.3833                                                                         | 4.0378  | -0.0397 |
| 2.4133                                                                         | 3.9040  | -1.2500 |
| 2.4459                                                                         | 5.2205  | 0.5987  |
| -3.2272                                                                        | 0.1153  | -0.8201 |
| -2.7496                                                                        | -0.1408 | -3.2377 |
| -1.1530                                                                        | 0.5243  | -3.0302 |
| 0.5687                                                                         | -0.7860 | -1.6525 |

| (2 <i>R</i> *,4 <i>S</i> *,5 <i>R</i> *,9 <i>S</i> *,10 <i>R</i> *)-7 <b>J</b> |         |         |
|--------------------------------------------------------------------------------|---------|---------|
| -2.3010                                                                        | 0.7749  | -1.9692 |
| -1.8178                                                                        | 0.1231  | -3.2609 |
| -1.1710                                                                        | -1.2723 | -3.0506 |
| -0.0527                                                                        | -1.1368 | -1.9523 |
| -0.4605                                                                        | -0.4412 | -0.6076 |
| -1.1734                                                                        | 0.8979  | -0.9482 |
| 0.7476                                                                         | -2.4076 | -1.6693 |
| 1.7173                                                                         | -2.3762 | -0.5528 |
| 1.8155                                                                         | -1.3291 | 0.2842  |
| 0.8730                                                                         | -0.1179 | 0.2098  |
| 1.2495                                                                         | 2.2167  | 3.3572  |
| 1.5585                                                                         | 1.6205  | 1.9961  |
| 0.5699                                                                         | 0.5091  | 1.6057  |
| -1.4033                                                                        | -1.3228 | 0.2488  |
| -2.3032                                                                        | -2.3032 | -2.7847 |
| -0.5224                                                                        | -1.6444 | -4.4147 |
| 0.5704                                                                         | 3.3788  | 3.4402  |
| 2.9393                                                                         | -1.3323 | 1.2884  |
| 1.7270                                                                         | 1.4076  | 4.5354  |
| 0.6958                                                                         | -3.4218 | -2.3631 |
| -2.7638                                                                        | 2.0914  | -2.2646 |
| -1.8872                                                                        | -3.4766 | -2.1137 |
| 0.2098                                                                         | 4.0893  | 4.6809  |
| -0.9184                                                                        | 4.4847  | 4.9132  |
| 1.2727                                                                         | 4.3256  | 5.4732  |
| -3.1449                                                                        | 0.2295  | -1.5375 |
| -2.6557                                                                        | 0.0573  | -3.9685 |
| -1.0968                                                                        | 0.7999  | -3.7421 |
| 0.6985                                                                         | -0.4693 | -2.4095 |

|   |         |         |         |
|---|---------|---------|---------|
| H | 2.0637  | -0.4801 | 0.2856  |
| H | 1.6095  | 1.1802  | 0.5366  |
| H | -2.8985 | -2.0795 | -1.9535 |
| H | 0.0297  | -1.5020 | 0.6965  |
| H | 0.1673  | -0.9453 | 2.9919  |
| H | -1.5442 | -1.2951 | 2.9529  |
| H | -1.8661 | 0.7418  | 1.4208  |
| H | -0.1662 | 1.0705  | 1.6039  |
| H | -0.5991 | 2.0543  | -0.3566 |
| H | 0.1159  | 1.9632  | -1.9358 |
| H | -1.4463 | 1.2061  | -1.6443 |
| H | 1.6700  | 0.6095  | -4.9838 |
| H | 1.3910  | 1.6360  | -3.6106 |
| H | 0.9596  | -1.9660 | -4.7005 |
| H | 2.6650  | -1.5553 | -4.6391 |
| H | 1.9842  | -2.6357 | -3.4219 |
| H | 0.9149  | 0.2817  | 4.8171  |
| H | -3.7733 | -2.2775 | 0.1721  |
| H | -2.5517 | -2.5289 | 1.4104  |
| H | -3.3715 | -0.9502 | 1.2494  |
| H | -3.1852 | 0.0997  | 4.0842  |
| H | -2.6921 | 1.3399  | 5.2222  |
| H | -2.7173 | 1.7059  | 3.4880  |
| H | 4.5763  | 1.3239  | -1.2795 |
| H | -0.5782 | -0.1297 | -4.6338 |
| H | -0.8501 | 2.9518  | 4.8742  |

|         |         |         |
|---------|---------|---------|
| -0.6591 | 1.2773  | -0.3058 |
| -1.8812 | 0.5878  | 0.7407  |
| 3.0377  | -2.9453 | 0.4470  |
| 1.2911  | 0.6098  | 0.6715  |
| 1.8610  | 1.5462  | 3.1228  |
| 0.3658  | 1.8016  | 3.9822  |
| 0.4853  | -0.5225 | 3.3117  |
| -0.8266 | 0.2645  | 2.5109  |
| -1.4023 | -1.7063 | 1.8416  |
| -2.0165 | -2.1675 | 0.2875  |
| -0.5200 | -2.8827 | 0.8869  |
| -2.1459 | -2.4797 | -3.2535 |
| -1.8129 | -2.8700 | -1.5860 |
| 1.1932  | -2.1635 | -3.7207 |
| -0.1106 | -1.3955 | -4.6323 |
| 1.0608  | -0.4079 | -3.7530 |
| -1.6890 | 2.5168  | 2.2256  |
| 3.4079  | -0.0468 | 2.3644  |
| 2.5596  | -1.2567 | 3.3609  |
| 3.8657  | -1.7443 | 2.2871  |
| 2.3182  | 2.8312  | 1.0779  |
| 1.3446  | 4.2589  | 0.7791  |
| 2.1157  | 4.0438  | 2.3589  |
| -3.4199 | 1.3655  | -2.2508 |
| 0.1772  | -3.8892 | -2.4555 |
| -2.2947 | 2.9344  | -0.1474 |

|         |         |         |
|---------|---------|---------|
| -0.7498 | 0.9615  | -1.8473 |
| -1.9008 | 0.8315  | -0.5495 |
| 3.1667  | -2.3695 | 0.5550  |
| 1.2157  | 0.9055  | -0.6271 |
| 0.6533  | 3.0919  | 0.3035  |
| 1.9630  | 2.5480  | 1.3189  |
| 0.3716  | 0.7429  | 2.2733  |
| -0.8224 | 1.3289  | 1.1510  |
| -0.3706 | -2.1240 | 1.1904  |
| -1.4908 | -0.7797 | 1.3711  |
| -1.8555 | -2.0522 | 0.2480  |
| -1.6512 | -4.2947 | -2.6628 |
| -2.3193 | -3.2223 | -1.4708 |
| 0.9141  | -3.8656 | -3.3360 |
| -0.3411 | -3.3716 | -4.4591 |
| 0.9793  | -2.2630 | -4.0849 |
| 2.2068  | 3.5317  | 3.4096  |
| 3.4948  | 0.9712  | 1.1261  |
| 2.5797  | 0.3732  | 2.5378  |
| 3.8718  | -0.5895 | 1.8406  |
| -1.7798 | 3.1596  | 2.4335  |
| -1.3091 | 4.8131  | 2.8665  |
| -1.2355 | 4.3049  | 1.1900  |
| -3.6718 | -0.0502 | -3.4150 |
| 0.1865  | -4.5099 | -1.1461 |
| -0.6932 | 3.4561  | 4.7977  |

|         |         |         |
|---------|---------|---------|
| -0.4653 | 1.3929  | -0.6330 |
| -1.6337 | 1.2314  | 0.6469  |
| 2.1216  | -3.5604 | 0.3436  |
| 1.3433  | 0.3379  | 0.3325  |
| 2.5249  | 1.0328  | 2.6995  |
| 1.3250  | 1.7297  | 3.7492  |
| 0.4753  | -0.4177 | 3.1238  |
| -0.4982 | 0.7906  | 2.3566  |
| -1.7995 | -0.9340 | 1.9647  |
| -2.5327 | -1.6137 | 0.5461  |
| -1.1706 | -2.4356 | 1.2996  |
| -3.0033 | -2.7944 | -2.9067 |
| -3.3082 | -1.9923 | -1.3963 |
| -0.4174 | -3.0210 | -3.6188 |
| -1.4166 | -1.8387 | -4.4463 |
| 0.1825  | -1.3738 | -3.8639 |
| 3.1270  | 2.1586  | 0.6768  |
| 3.4773  | -0.7979 | 1.8442  |
| 2.4191  | -1.5269 | 3.0831  |
| 3.3641  | -2.5444 | 2.0075  |
| 0.3902  | 4.0619  | 3.1108  |
| 0.1503  | 4.3897  | 1.3876  |
| -0.6783 | 3.0391  | 2.1332  |
| -2.0585 | 2.4057  | -2.0168 |
| -1.3618 | -4.0348 | -1.6826 |
| 2.4816  | 5.1291  | 1.5694  |

|         |         |         |
|---------|---------|---------|
| -0.4371 | 1.6190  | -1.3311 |
| -1.5875 | 1.3707  | -0.0502 |
| 2.3768  | -3.2364 | -0.4983 |
| 1.4231  | 0.6370  | -0.3720 |
| 1.5234  | 2.4069  | 1.2302  |
| 2.5914  | 1.2618  | 2.0004  |
| 0.5384  | -0.2741 | 2.3725  |
| -0.4242 | 0.9654  | 1.6227  |
| -1.6587 | -0.8413 | 1.1980  |
| -2.3573 | -1.5152 | -0.2409 |
| -0.9580 | -2.2922 | 0.4917  |
| -2.7719 | -2.6108 | -3.7274 |
| -3.1140 | -1.8741 | -2.1921 |
| -0.1811 | -2.6821 | -4.4496 |
| -1.2405 | -1.5241 | -5.2350 |
| 0.3348  | -0.9995 | -4.6388 |
| 0.1749  | 3.8608  | 2.5501  |
| 3.6125  | -0.4899 | 1.1044  |
| 2.5619  | -1.2795 | 2.3131  |
| 3.5474  | -2.2420 | 1.2241  |
| 2.8202  | 1.4312  | 4.5877  |
| 1.3318  | 1.7664  | 5.4894  |
| 1.4107  | 0.3641  | 4.4410  |
| -3.5336 | 2.0093  | -2.8541 |
| -1.0684 | -3.8074 | -2.5410 |
| 2.1124  | 4.0212  | 5.0817  |

| (2 <i>R</i> *,4 <i>S</i> *,5 <i>R</i> *,9 <i>S</i> *,10 <i>R</i> *)-7 <i>K</i> |         |         |         |
|--------------------------------------------------------------------------------|---------|---------|---------|
| C                                                                              | 2.6729  | 0.9586  | -1.4113 |
| C                                                                              | 2.8093  | -0.0909 | -2.5097 |
| C                                                                              | 1.4593  | -0.4797 | -3.1703 |
| C                                                                              | 0.4508  | -0.8820 | -2.0319 |
| C                                                                              | 0.2843  | 0.1270  | -0.8433 |
| C                                                                              | 1.6999  | 0.5085  | -0.3252 |
| C                                                                              | -0.9174 | -1.3694 | -2.5080 |
| C                                                                              | -1.9525 | -1.6260 | -1.4829 |
| C                                                                              | -1.7689 | -1.3260 | -0.1855 |
| C                                                                              | -0.5085 | -0.6134 | 0.3287  |
| C                                                                              | -0.9744 | 0.5273  | 4.0677  |
| C                                                                              | -0.6163 | -0.3719 | 2.8982  |
| C                                                                              | -0.7862 | 0.3295  | 1.5401  |
| C                                                                              | -0.4732 | 1.4115  | -1.2631 |
| C                                                                              | 1.0292  | 0.6709  | -4.1225 |
| C                                                                              | 1.7679  | -1.7191 | -4.0582 |
| C                                                                              | -2.1746 | 0.3919  | 4.6675  |
| C                                                                              | -2.8242 | -1.7681 | 0.7961  |
| C                                                                              | 0.0744  | 1.5402  | 4.4486  |
| O                                                                              | -1.1811 | -1.6398 | -3.6785 |
| O                                                                              | 3.9464  | 1.1534  | -0.7988 |
| O                                                                              | -0.3534 | 0.7078  | -4.4169 |
| C                                                                              | -2.6707 | 1.1665  | 5.8198  |
| O                                                                              | -3.7709 | 1.6888  | 5.8387  |
| O                                                                              | -1.8232 | 1.1495  | 6.8657  |
| H                                                                              | 2.3649  | 1.9257  | -1.8188 |
| H                                                                              | 3.5201  | 0.2677  | -3.2668 |
| H                                                                              | 3.2850  | -0.9840 | -2.0788 |
| H                                                                              | 0.8933  | -1.7891 | -1.5842 |

| (2 <i>R</i> *,4 <i>S</i> *,5 <i>R</i> *,9 <i>S</i> *,10 <i>R</i> *)-7 <i>L</i> |         |         |
|--------------------------------------------------------------------------------|---------|---------|
| 2.7043                                                                         | 0.8329  | -1.3124 |
| 2.8340                                                                         | -0.1961 | -2.4304 |
| 1.4905                                                                         | -0.5202 | -3.1361 |
| 0.4408                                                                         | -0.9173 | -2.0342 |
| 0.2762                                                                         | 0.0666  | -0.8239 |
| 1.6894                                                                         | 0.3916  | -0.2606 |
| -0.9297                                                                        | -1.3463 | -2.5574 |
| -1.9946                                                                        | -1.6039 | -1.5638 |
| -1.8343                                                                        | -1.3437 | -0.2548 |
| -0.5705                                                                        | -0.6768 | 0.3092  |
| -1.0605                                                                        | 0.4474  | 4.0500  |
| -0.7874                                                                        | -0.4808 | 2.8796  |
| -0.8611                                                                        | 0.2514  | 1.5292  |
| -0.4286                                                                        | 1.3852  | -1.2295 |
| 1.1246                                                                         | 0.6690  | -4.0677 |
| 1.7797                                                                         | -1.7461 | -4.0489 |
| -0.0642                                                                        | 0.7675  | 4.9006  |
| -2.9210                                                                        | -1.7907 | 0.6892  |
| -2.4982                                                                        | 0.8706  | 4.2117  |
| -1.1769                                                                        | -1.5683 | -3.7414 |
| 3.9813                                                                         | 0.9648  | -0.6916 |
| -0.2521                                                                        | 0.7698  | -4.3782 |
| -0.1691                                                                        | 1.6402  | 6.0853  |
| 0.2984                                                                         | 1.3385  | 7.1688  |
| -0.7475                                                                        | 2.8257  | 5.8159  |
| 2.4438                                                                         | 1.8154  | -1.7160 |
| 3.5785                                                                         | 0.1541  | -3.1586 |
| 3.2652                                                                         | -1.1157 | -2.0085 |
| 0.8417                                                                         | -1.8495 | -1.5993 |

| (2 <i>R</i> *,4 <i>S</i> *,5 <i>R</i> *,9 <i>S</i> *,10 <i>R</i> *)-7 <i>M</i> |         |         |
|--------------------------------------------------------------------------------|---------|---------|
| -3.1401                                                                        | -0.2695 | 0.5265  |
| -3.4785                                                                        | -1.4848 | -0.3304 |
| -2.3911                                                                        | -2.5913 | -0.2970 |
| -1.0092                                                                        | -1.9325 | -0.6575 |
| -0.6036                                                                        | -0.6492 | 0.1480  |
| -1.8010                                                                        | 0.3436  | 0.1240  |
| 0.1739                                                                         | -2.8960 | -0.7479 |
| 1.5190                                                                         | -2.3157 | -0.9516 |
| 1.7421                                                                         | -0.9904 | -0.9234 |
| 0.6408                                                                         | 0.0281  | -0.5907 |
| 2.2109                                                                         | 3.5858  | 0.0085  |
| 1.5974                                                                         | 2.4241  | -0.7528 |
| 1.1738                                                                         | 1.2761  | 0.1787  |
| -0.2341                                                                        | -0.9702 | 1.6180  |
| -2.4878                                                                        | -3.3353 | 1.0642  |
| -2.7909                                                                        | -3.6075 | -1.4048 |
| 3.5219                                                                         | 3.8656  | -0.1388 |
| 3.1175                                                                         | -0.5011 | -1.2994 |
| 1.2449                                                                         | 4.4067  | 0.8238  |
| 0.0667                                                                         | -4.1211 | -0.7434 |
| -4.1669                                                                        | 0.7008  | 0.3315  |
| -1.3006                                                                        | -3.9969 | 1.4576  |
| 4.2610                                                                         | 4.9604  | 0.5174  |
| 5.0081                                                                         | 5.7073  | -0.0887 |
| 4.0886                                                                         | 4.9830  | 1.8525  |
| -3.1454                                                                        | -0.5287 | 1.5890  |
| -4.4508                                                                        | -1.8886 | -0.0159 |
| -3.6362                                                                        | -1.1477 | -1.3653 |
| -1.1324                                                                        | -1.5944 | -1.7013 |

| (2 <i>R</i> *,4 <i>S</i> *,5 <i>R</i> *,9 <i>S</i> *,10 <i>R</i> *)-7 <i>N</i> |         |         |
|--------------------------------------------------------------------------------|---------|---------|
| -2.6300                                                                        | 0.7840  | 0.8454  |
| -3.2478                                                                        | 0.0347  | -0.3297 |
| -2.7069                                                                        | -1.4100 | -0.4967 |
| -1.1362                                                                        | -1.3434 | -0.5496 |
| -0.4191                                                                        | -0.5486 | 0.5976  |
| -1.1082                                                                        | 0.8393  | 0.7353  |
| -0.4321                                                                        | -2.6783 | -0.7881 |
| 1.0443                                                                         | -2.7005 | -0.7107 |
| 1.7608                                                                         | -1.6349 | -0.3133 |
| 1.1083                                                                         | -0.3306 | 0.1718  |
| 2.5872                                                                         | 2.4952  | -0.0695 |
| 3.0472                                                                         | 1.3398  | 0.8018  |
| 1.9288                                                                         | 0.3957  | 1.2856  |
| -0.4860                                                                        | -1.2866 | 1.9578  |
| -3.3419                                                                        | -2.3028 | 0.6060  |
| -3.2555                                                                        | -1.9089 | -1.8641 |
| 2.8636                                                                         | 2.4861  | -1.3897 |
| 3.2604                                                                         | -1.7226 | -0.4173 |
| 1.8301                                                                         | 3.5859  | 0.6430  |
| -1.0092                                                                        | -3.7139 | -1.1153 |
| -3.1429                                                                        | 2.1146  | 0.8347  |
| -2.6102                                                                        | -3.4757 | 0.9083  |
| 2.5024                                                                         | 3.5317  | -2.3638 |
| 1.9326                                                                         | 3.2866  | -3.4119 |
| 2.9473                                                                         | 4.7514  | -2.0086 |
| -2.9338                                                                        | 0.3361  | 1.7957  |
| -4.3410                                                                        | 0.0282  | -0.2194 |
| -3.0617                                                                        | 0.6118  | -1.2473 |
| -0.9182                                                                        | -0.7804 | -1.4739 |

| (2 <i>R</i> *,4 <i>S</i> *,5 <i>R</i> *,9 <i>S</i> *,10 <i>R</i> *)-7 <i>O</i> |         |         |
|--------------------------------------------------------------------------------|---------|---------|
| 2.4849                                                                         | 1.0166  | -1.5908 |
| 2.6890                                                                         | -0.1658 | -2.5259 |
| 1.3654                                                                         | -0.6984 | -3.1325 |
| 0.3651                                                                         | -0.9961 | -1.9601 |
| 0.1838                                                                         | 0.1003  | -0.8478 |
| 1.5801                                                                         | 0.6298  | -0.4224 |
| -1.0159                                                                        | -1.4900 | -2.3827 |
| -1.9761                                                                        | -1.7968 | -1.2962 |
| -1.7441                                                                        | -1.4376 | -0.0205 |
| -0.5137                                                                        | -0.6137 | 0.4014  |
| -0.9051                                                                        | 0.7222  | 4.0827  |
| -0.5370                                                                        | -0.2247 | 2.9548  |
| -0.8062                                                                        | 0.3801  | 1.5665  |
| -0.6802                                                                        | 1.3026  | -1.3154 |
| 0.8184                                                                         | 0.2693  | -4.2116 |
| 1.7322                                                                         | -2.0284 | -3.8498 |
| -2.0719                                                                        | 0.5545  | 4.7376  |
| -2.7060                                                                        | -1.9178 | 1.0358  |
| 0.0939                                                                         | 1.8160  | 4.3598  |
| -1.3626                                                                        | -1.6886 | -3.5418 |
| 3.7450                                                                         | 1.4089  | -1.0497 |
| 1.8431                                                                         | 0.6133  | -5.1437 |
| -2.5720                                                                        | 1.3702  | 5.8594  |
| -3.7000                                                                        | 1.8288  | 5.8890  |
| -1.6884                                                                        | 1.4679  | 6.8704  |
| 2.0825                                                                         | 1.8802  | -2.1284 |
| 3.4095                                                                         | 0.1044  | -3.3084 |
| 3.1893                                                                         | -0.9682 | -1.9638 |
| 0.8089                                                                         | -1.8665 | -1.4468 |

|   |         |         |         |
|---|---------|---------|---------|
| H | 2.1418  | -0.3494 | 0.2014  |
| H | 1.6502  | 1.3038  | 0.4274  |
| H | -2.8447 | -2.1226 | -1.8508 |
| H | 0.1477  | -1.4192 | 0.6911  |
| H | 0.4227  | -0.7069 | 3.0134  |
| H | -1.2213 | -1.2825 | 2.9396  |
| H | -1.7867 | 0.7727  | 1.4600  |
| H | -0.0978 | 1.1778  | 1.5363  |
| H | -0.6132 | 2.0946  | -0.4194 |
| H | 0.0648  | 1.9889  | -2.0141 |
| H | -1.4667 | 1.1945  | -1.6666 |
| H | 1.5680  | 0.6028  | -5.0754 |
| H | 1.2897  | 1.6520  | -3.7194 |
| H | 0.9346  | -1.9861 | -4.7131 |
| H | 2.6289  | -1.5283 | -4.7106 |
| H | 2.0128  | -2.5963 | -3.4488 |
| H | -2.9174 | -0.2998 | 4.2796  |
| H | -3.6611 | -2.2745 | 0.3014  |
| H | -2.4019 | -2.4819 | 1.5094  |
| H | -3.2489 | -0.9198 | 1.3393  |
| H | 0.4033  | 2.1062  | 3.5717  |
| H | -0.2842 | 2.2757  | 5.1735  |
| H | 0.9453  | 1.0347  | 4.8777  |
| H | 4.5525  | 1.4951  | -1.4792 |
| H | -0.6489 | -0.1992 | -4.6461 |
| H | -1.0319 | 0.6025  | 6.7053  |

|         |         |         |
|---------|---------|---------|
| 2.0908  | -0.4906 | 0.2579  |
| 1.6432  | 1.1720  | 0.5077  |
| -2.8887 | -2.0697 | -1.9658 |
| 0.0533  | -1.5066 | 0.6742  |
| 0.2096  | -0.9299 | 2.9789  |
| -1.4932 | -1.3142 | 2.9265  |
| -1.8343 | 0.7417  | 1.4053  |
| -0.1331 | 1.0661  | 1.5841  |
| -0.5641 | 2.0532  | -0.3730 |
| 0.1457  | 1.9611  | -1.9545 |
| -1.4195 | 1.2111  | -1.6591 |
| 1.6735  | 0.6006  | -5.0147 |
| 1.4183  | 1.6292  | -3.6381 |
| 0.9542  | -1.9674 | -4.7302 |
| 2.6626  | -1.5679 | -4.6751 |
| 1.9799  | -2.6466 | -3.4574 |
| 0.9270  | 0.3361  | 4.7896  |
| -3.7550 | -2.2684 | 0.1621  |
| -2.5286 | -2.5303 | 1.3933  |
| -3.3424 | -0.9476 | 1.2430  |
| -3.1652 | 0.0136  | 4.0687  |
| -2.7138 | 1.2683  | 5.2073  |
| -2.7563 | 1.6359  | 3.4734  |
| 3.9266  | 1.6946  | -0.0507 |
| -0.5725 | -0.1160 | -4.6533 |
| -0.9709 | 2.9365  | 4.8735  |

|         |         |         |
|---------|---------|---------|
| -1.9054 | 0.7699  | -0.8838 |
| -1.6184 | 1.2056  | 0.7759  |
| 2.2960  | -3.0382 | -1.1807 |
| 0.2729  | 0.3822  | -1.5656 |
| 0.7237  | 2.7854  | -1.3103 |
| 2.2992  | 2.0649  | -1.5105 |
| 2.0031  | 0.9933  | 0.8394  |
| 0.4039  | 1.6809  | 0.8408  |
| 0.5865  | -1.6899 | 1.6921  |
| 0.0766  | -0.0738 | 2.1639  |
| -1.0744 | -1.3732 | 2.1825  |
| -3.2905 | -4.0822 | 1.0398  |
| -2.7532 | -2.6599 | 1.8804  |
| -2.1970 | -4.5243 | -1.3688 |
| -3.8398 | -3.9101 | -1.2980 |
| -2.6805 | -3.1728 | -2.4047 |
| 4.1421  | 3.3006  | -0.8293 |
| 3.8028  | -1.3272 | -1.5219 |
| 3.0658  | 0.1163  | -2.2009 |
| 3.5744  | 0.0746  | -0.4900 |
| 0.3313  | 4.5985  | 0.2509  |
| 0.9726  | 3.8759  | 1.7411  |
| 1.6481  | 5.3847  | 1.1011  |
| -4.0059 | 1.4325  | 0.9519  |
| -0.9715 | -4.5203 | 0.6956  |
| 3.5399  | 4.2460  | 2.1785  |

|         |         |         |
|---------|---------|---------|
| -0.8457 | 1.4688  | -0.1265 |
| -0.7337 | 1.3843  | 1.6090  |
| 1.5026  | -3.6242 | -1.0496 |
| 1.0894  | 0.3222  | -0.7107 |
| 3.8296  | 0.7721  | 0.2906  |
| 3.5459  | 1.7612  | 1.6851  |
| 2.3728  | -0.3490 | 1.9592  |
| 1.2751  | 0.9930  | 1.9260  |
| 0.0376  | -0.7330 | 2.7439  |
| -1.5066 | -1.4057 | 2.3203  |
| -0.0358 | -2.2826 | 1.9130  |
| -4.3543 | -2.6101 | 0.3173  |
| -3.4667 | -1.7629 | 1.5470  |
| -3.0857 | -2.9771 | -2.0212 |
| -4.3390 | -1.7515 | -1.9318 |
| -2.7979 | -1.3678 | -2.6999 |
| 3.3431  | 1.6299  | -1.8559 |
| 3.6374  | -0.9559 | -1.1005 |
| 3.7338  | -1.6080 | 0.5617  |
| 3.5921  | -2.6887 | -0.8150 |
| 2.4980  | 4.1209  | 1.3256  |
| 1.3860  | 4.3155  | -0.0392 |
| 1.0050  | 3.1690  | 1.2271  |
| -2.8102 | 2.5678  | 1.6281  |
| -2.3700 | -3.9154 | 0.0646  |
| 3.4648  | 4.7430  | -1.1821 |

|         |         |         |
|---------|---------|---------|
| 2.0960  | -0.1307 | 0.1806  |
| 1.4926  | 1.5007  | 0.2381  |
| -2.8492 | -2.3639 | -1.6021 |
| 0.2084  | -1.3515 | 0.7828  |
| 0.5250  | -0.4877 | 3.0440  |
| -1.0809 | -1.1661 | 3.0765  |
| -1.8375 | 0.7497  | 1.5046  |
| -0.1757 | 1.2686  | 1.4828  |
| -0.9140 | 1.9804  | -0.4884 |
| -0.1698 | 1.9249  | -2.0499 |
| -1.6352 | 0.9943  | -1.7498 |
| 0.4568  | 1.2053  | -3.7948 |
| 0.0025  | -0.1798 | -4.7836 |
| 0.8765  | -2.4601 | -4.3776 |
| 2.5264  | -1.8764 | -4.5900 |
| 2.0937  | -2.7788 | -3.1374 |
| -2.7850 | -0.2023 | 4.4224  |
| -3.5244 | -2.5093 | 0.6095  |
| -2.1893 | -2.5637 | 1.7517  |
| -3.1668 | -1.0815 | 1.5681  |
| 0.3559  | 2.3443  | 3.4380  |
| -0.2817 | 2.5731  | 5.0531  |
| 1.0089  | 1.3894  | 4.7831  |
| 4.3217  | 1.6370  | -1.8005 |
| 1.4048  | 1.0526  | -5.8937 |
| -0.8716 | 0.9588  | 6.7129  |

| <b>(2R*,4S*,5R*,9S*,10R*)-7P</b> |         |         |         |
|----------------------------------|---------|---------|---------|
| C                                | -2.6300 | 0.7322  | 0.8115  |
| C                                | -3.1532 | -0.0215 | -0.4015 |
| C                                | -2.6066 | -1.4698 | -0.5155 |
| C                                | -1.0363 | -1.4114 | -0.4277 |
| C                                | -0.3782 | -0.5230 | 0.6926  |
| C                                | -1.1092 | 0.8434  | 0.7559  |
| C                                | -0.3223 | -2.7578 | -0.4392 |
| C                                | 1.1577  | -2.7313 | -0.4177 |
| C                                | 1.8402  | -1.6078 | -0.1311 |
| C                                | 1.1490  | -0.2899 | 0.2665  |
| C                                | 2.5103  | 2.5670  | -0.1554 |
| C                                | 3.0194  | 1.4888  | 0.7855  |
| C                                | 1.9416  | 0.5315  | 1.3318  |
| C                                | -0.4372 | -1.1740 | 2.1008  |
| C                                | -3.3059 | -2.3547 | 0.5539  |
| C                                | -3.0217 | -1.9744 | -1.9252 |
| C                                | 2.7949  | 2.4913  | -1.4717 |
| C                                | 3.3392  | -1.6395 | -0.2687 |
| C                                | 1.6948  | 3.6595  | 0.4874  |
| O                                | -0.8901 | -3.8443 | -0.4911 |
| O                                | -3.1598 | 2.0553  | 0.8098  |
| O                                | -3.3714 | -3.7322 | 0.2178  |
| C                                | 2.3888  | 3.4521  | -2.5132 |
| O                                | 1.8556  | 3.1076  | -3.5527 |
| O                                | 2.7536  | 4.7164  | -2.2305 |
| H                                | -2.9557 | 0.2559  | 1.7410  |
| H                                | -4.2516 | -0.0217 | -0.3887 |
| H                                | -2.8903 | 0.5507  | -1.3033 |
| H                                | -0.7389 | -0.9467 | -1.3836 |



|   |         |         |         |
|---|---------|---------|---------|
| H | -0.8347 | 1.4524  | -0.1169 |
| H | -0.7849 | 1.4289  | 1.6240  |
| H | 1.6396  | -3.6666 | -0.6831 |
| H | 1.1188  | 0.3022  | -0.6575 |
| H | 3.8225  | 0.9206  | 0.3073  |
| H | 3.5019  | 1.9852  | 1.6383  |
| H | 2.4181  | -0.1540 | 2.0447  |
| H | 1.2652  | 1.1391  | 1.9383  |
| H | -1.4515 | -1.2230 | 2.4971  |
| H | -0.0259 | -2.1871 | 2.1173  |
| H | 0.1249  | -0.5923 | 2.8384  |
| H | -4.3464 | -2.0348 | 0.6810  |
| H | -2.8435 | -2.2801 | 1.5348  |
| H | -2.6517 | -2.9820 | -2.1363 |
| H | -4.1132 | -1.9946 | -2.0260 |
| H | -2.6328 | -1.3186 | -2.7128 |
| H | 3.3196  | 1.6327  | -1.8816 |
| H | 3.6667  | -0.9018 | -1.0071 |
| H | 3.8287  | -1.4421 | 0.6890  |
| H | 3.7021  | -2.6145 | -0.6139 |
| H | 2.3328  | 4.2726  | 1.1318  |
| H | 1.2125  | 4.3178  | -0.2398 |
| H | 0.8928  | 3.2388  | 1.0999  |
| H | -4.1306 | 1.9881  | 0.8097  |
| H | -2.4669 | -4.0315 | -0.0202 |
| H | 3.2493  | 4.7929  | -1.3942 |
